# Supplementary material for: Synthesis of Benzo[b]azocin‐2‐ones by Aryl Amination and Ring‐Expansion of α‐(Iodophenyl)‐β‐oxoesters
Source: PubMed Central journal article supplement (PMC6899745; doi:10.1002/chem.201903139), 2019-10-28

# CHEMISTRY

## A **European** Journal

### Supporting Information

#### **Synthesis of Benzo[*b*]azocin-2-ones by Aryl Amination and Ring-Expansion of $\alpha$ -(Iodophenyl)- $\beta$ -oxoesters**

Anna Dierks, Jan Tönjes, Marc Schmidtman, and Jens Christoffers\*<sup>[a]</sup>

chem\_201903139\_sm\_miscellaneous\_information.pdf

## Supporting Information

|                                                                                                                       |     |
|-----------------------------------------------------------------------------------------------------------------------|-----|
| Preparation of compounds <b>20b</b> and <b>20c</b>                                                                    | S1  |
| Conversion of $\beta$ -oxoester <b>20a</b> with <i>n</i> -butylamine (products <b>18b</b> , <b>25b</b> )              | S2  |
| Conversion of $\beta$ -oxoester <b>20a</b> with <i>n</i> -hexylamine (products <b>18c</b> , <b>24c</b> , <b>25c</b> ) | S3  |
| Conversion of $\beta$ -oxoester <b>20a</b> with cyclohexylamine (products <b>18d</b> , <b>24d</b> )                   | S4  |
| Conversion of $\beta$ -oxoester <b>20a</b> with allylamine (products <b>18e</b> , <b>24e</b> )                        | S5  |
| Conversion of $\beta$ -oxoester <b>20a</b> with 2-ethoxyethylamine (product <b>18f</b> )                              | S6  |
| Preparation of compounds <b>18j</b> and <b>18k</b>                                                                    | S7  |
| Preparation of compounds <b>27b</b> and <b>27c</b>                                                                    | S8  |
| $^1\text{H}$ and $^{13}\text{C}\{^1\text{H}\}$ NMR spectra of all reported compounds                                  | S10 |

**Ethyl 1-(2-iodophenyl)-2-oxocyclohexane-1-carboxylate (20b).**<sup>[25]</sup> According to GPA, TFAA (630 mg, 3.00 mmol), PIFA (1.12 g, 2.60 mmol) and  $\beta$ -oxoester **21b** (340 mg, 2.00 mmol) were converted in TFA (4 mL) and MeCN (4 mL) to furnish the title compound **20b** (468 mg, 1.26 mmol, 63%) after chromatography ( $\text{SiO}_2$ , hexanes/MTBE 5:1,  $R_f = 0.29$ ) as a colorless oil.  $^1\text{H-NMR}$  (300 MHz,  $\text{CDCl}_3$ ):  $\delta = 1.27$  (t,  $J = 7.1$  Hz, 3H), 1.75–1.91 (m, 2H), 1.97–2.07 (m, 2H), 2.58–2.85 (m, 4H), 4.20–4.37 (m, 2H), 6.96 (t,  $J = 7.5$  Hz, 1H), 7.05 (d,  $J = 7.9$  Hz, 1H), 7.32 (t,  $J = 7.6$  Hz, 1H), 7.96 (d,  $J = 7.8$  Hz, 1H) ppm. All spectroscopic data are in accordance with the literature.<sup>[25]</sup>  $\text{C}_{15}\text{H}_{17}\text{IO}_3$  (372.20 g mol $^{-1}$ ).

**Methyl 1-(2-iodophenyl)-2-oxocycloheptane-1-carboxylate (20c).**<sup>[25]</sup> According to GPA, TFAA (315 mg, 1.50 mmol), PIFA (559 mg, 1.30 mmol) and  $\beta$ -oxoester **21c** (170 mg, 1.00 mmol) were converted in TFA (2 mL) and MeCN (2 mL) to furnish the the title compound **20c** (173 mg, 465  $\mu\text{mol}$ , 47%) after chromatography ( $\text{SiO}_2$ , hexanes/MTBE 2:1,  $R_f = 0.43$ ) as a colorless oil.  $^1\text{H-NMR}$  (300 MHz,  $\text{CDCl}_3$ ): 1.47–1.58 (m, 1H), 1.68–1.80 (m, 5H), 2.11–2.19 (m, 1H), 2.73–2.81 (m, 1H), 2.96–3.03 (m, 1H), 3.16–3.24 (m, 1H), 3.73 (s, 3H), 6.96 (t,  $J = 7.6$  Hz, 1H), 7.02 (d,  $J = 7.7$  Hz, 1H), 7.32 (t,  $J = 7.7$  Hz, 1H), 7.94 (d,  $J = 7.8$  Hz, 1H) ppm. All spectroscopic data are in accordance with the literature.<sup>[25]</sup>  $\text{C}_{15}\text{H}_{17}\text{IO}_3$  (372.20 g mol $^{-1}$ ).

**Conversion of  $\beta$ -oxoester 20a with *n*-butylamine.** According to GPB,  $\beta$ -oxoester **20a** (179 mg, 500  $\mu$ mol),  $K_3PO_4$  (212 mg, 1.00 mmol) and  $CuI$  (14 mg, 75  $\mu$ mol) were converted with *n*-butylamine (0.5 mL). The crude product was purified by column chromatography ( $SiO_2$ , hexanes/MTBE 1:1) to yield the benzazocinone **18b** (78 mg, 0.26 mmol, 51%,  $R_f = 0.33$ ) as a colorless solid, mp 78 °C. As a second fraction, the acyclic amide **25b** (33 mg, 77  $\mu$ mol, 15%,  $R_f = 0.17$ ) was obtained as a colorless oil.

**Ethyl 1-butyl-2-oxo-1,2,3,4,5,6-hexahydrobenzo[*b*]azocine-6-carboxylate (18b).**

$^1H$ -NMR (500 MHz,  $CDCl_3$ ):  $\delta = 0.87$  (t,  $J = 7.3$  Hz, 3H), 1.16 (t,  $J = 7.1$  Hz, 3H), 1.24–1.37 (m, 2H), 1.40–1.49 (m, 1H), 1.50–1.65 (m, 2H), 1.76–1.85 (m, 2H), 1.89–1.94 (m, 1H), 2.23 (dd,  $J = 11.0$  Hz,  $J = 7.8$  Hz, 1H), 2.44 (dd,  $J = 13.4$  Hz,  $J = 4.5$  Hz, 1H), 3.26 (ddd,  $J = 13.3$  Hz,  $J = 10.4$  Hz,  $J = 5.0$  Hz, 1H), 3.55 (d,  $J = 11.0$  Hz, 1H), 4.08 (dq,  $J = 10.8$  Hz,  $J = 7.1$  Hz, 1H), 4.16 (dq,  $J = 10.8$  Hz,  $J = 7.1$  Hz, 1H), 4.38 (ddd,  $J = 13.3$  Hz,  $J = 10.4$  Hz,  $J = 5.9$  Hz, 1H), 7.21–7.24 (m, 1H), 7.28–7.32 (m, 2H), 7.33–7.35 (m, 1H) ppm.  $^{13}C\{^1H\}$ -NMR (125 MHz,  $CDCl_3$ ):  $\delta = 13.85$  ( $CH_3$ ), 13.98 ( $CH_3$ ), 20.43 ( $CH_2$ ), 24.27 ( $CH_2$ ), 29.22 ( $CH_2$ ), 31.95 ( $CH_2$ ), 33.16 ( $CH_2$ ), 44.78 (CH), 48.98 ( $CH_2$ ), 61.88 ( $CH_2$ ), 125.83 (CH), 126.87 (CH), 128.08 (CH), 128.41 (CH), 139.16 (C), 140.72 (C), 173.87 (C), 173.88 (C) ppm. IR (ATR):  $\nu(\tilde{)} = 2960$  (w), 2937 (w), 2869 (w), 1734 (s), 1653 (vs), 1495 (m), 1456 (m), 1397 (m), 1302 (m), 1226 (m), 1187 (s), 1154 (m), 1102 (m), 1047 (m), 1028 (m), 767 (m), 741 (m)  $cm^{-1}$ . HR-MS (ESI): calcd. 310.1989 (for  $C_{18}H_{25}LiNO_3^+$ ), found 310.1996 [ $M + Li^+$ ].  $C_{18}H_{25}NO_3$  (303.40  $g\ mol^{-1}$ ).

**Ethyl 6-(butylamino)-2-(2-iodophenyl)-6-oxohexanoate (25b).**

$^1H$ -NMR (500 MHz,  $CDCl_3$ ):  $\delta = 0.91$  (t,  $J = 7.3$  Hz, 3H), 1.20 (t,  $J = 7.1$  Hz, 3H), 1.33 (sext,  $J = 7.3$  Hz, 2H), 1.43–1.49 (m, 2H), 1.59–1.69 (m, 2H), 1.73–1.80 (m, 1H), 1.99–2.07 (m, 1H), 2.18 (t,  $J = 7.5$  Hz, 2H), 3.23 (q,  $J = 7.0$  Hz, 2H), 4.01 (t,  $J = 7.4$  Hz, 1H), 4.07–4.18 (m, 2H), 5.53 (br s, 1H), 6.90–6.95 (m, 1H), 7.30–7.31 (m, 2H), 7.84 (d,  $J = 7.9$  Hz, 1H) ppm.  $^{13}C\{^1H\}$ -NMR (125 MHz,  $CDCl_3$ ):  $\delta = 13.73$  ( $CH_3$ ), 14.09 ( $CH_3$ ), 20.05 ( $CH_2$ ), 23.53 ( $CH_2$ ), 31.66 ( $CH_2$ ), 32.93 ( $CH_2$ ), 36.37 ( $CH_2$ ), 39.21 ( $CH_2$ ), 54.68 (CH), 60.99 ( $CH_2$ ), 101.62 (C), 127.67 (CH), 128.65 (CH), 128.83 (CH), 139.75 (CH), 141.89 (C), 172.17 (C), 173.27 (C) ppm. IR (ATR):  $\nu(\tilde{)} = 3300$  (w), 2938 (w), 1731 (vs), 1640 (vs), 1548 (s), 1465 (m), 1369 (m), 1178 (m), 1149 (s), 1010 (s), 746

(s)  $\text{cm}^{-1}$ . HR-MS (EI, 70 eV): calcd. 431.0952 (for  $\text{C}_{18}\text{H}_{26}\text{INO}_3^+$ ), found 431.0952 [ $\text{M}^+$ ].  $\text{C}_{18}\text{H}_{26}\text{INO}_3$  (431.31  $\text{g mol}^{-1}$ ).

**Conversion of  $\beta$ -oxoester 20a with *n*-hexylamine.** According to GPB,  $\beta$ -oxoester **20a** (179 mg, 500  $\mu\text{mol}$ ),  $\text{K}_3\text{PO}_4$  (212 mg, 1.00 mmol) and  $\text{CuI}$  (14 mg, 75  $\mu\text{mol}$ ) were converted with *n*-hexylamine (0.5 mL). The crude mixture was separated by column chromatography ( $\text{SiO}_2$ , hexanes/MTBE 1:2) to yield as the first fraction the benzofuran **23a** (4 mg, 0.02 mmol, 4%,  $R_f = 0.65$ ) as a pale yellow oil. Secondly, the benzazocinone **18c** (83 mg, 0.25 mmol, 50%,  $R_f = 0.34$ ) was eluted as a colorless oil. As third and fourth fractions, the acyclic amide **25c** (5 mg, 0.01 mmol, 2%,  $R_f = 0.21$ ) and the acyclic amide **24c** (26 mg, 78  $\mu\text{mol}$ , 16%,  $R_f = 0.18$ ) were obtained, both as a colorless oils.

**Ethyl 1-hexyl-2-oxo-1,2,3,4,5,6-hexahydrobenzo[*b*]azocine-6-carboxylate (18c).**

$^1\text{H-NMR}$  (500 MHz,  $\text{CDCl}_3$ ):  $\delta = 0.80\text{--}0.82$  (m, 3H), 1.14 (t,  $J = 7.1$  Hz, 3H), 1.21–1.23 (m, 5H), 1.26–1.32 (m, 1H), 1.39–1.64 (m, 3H), 1.74–1.85 (m, 2H), 1.87–1.92 (m, 1H), 2.21 (dd,  $J = 11.0$  Hz,  $J = 7.8$  Hz, 1H), 2.40–2.44 (m, 1H), 3.23 (ddd,  $J = 13.2$  Hz,  $J = 10.8$  Hz,  $J = 4.9$  Hz, 1H), 3.53 (d,  $J = 10.7$  Hz, 1H), 4.06 (dq,  $J = 10.8$  Hz,  $J = 7.1$  Hz, 1H), 4.13 (dq,  $J = 10.8$  Hz,  $J = 7.1$  Hz, 1H), 4.35 (ddd,  $J = 13.2$  Hz,  $J = 10.8$  Hz,  $J = 5.8$  Hz, 1H), 7.19–7.22 (m, 1H), 7.26–7.33 (m, 3H) ppm.  $^{13}\text{C}\{^1\text{H}\}\text{-NMR}$  (125 MHz,  $\text{CDCl}_3$ ):  $\delta = 13.92$  (2  $\text{CH}_3$ ), 22.36 ( $\text{CH}_2$ ), 24.21 ( $\text{CH}_2$ ), 26.70 ( $\text{CH}_2$ ), 26.90 ( $\text{CH}_2$ ), 31.51 ( $\text{CH}_2$ ), 31.92 ( $\text{CH}_2$ ), 33.09 ( $\text{CH}_2$ ), 44.72 (CH), 49.17 ( $\text{CH}_2$ ), 60.82 ( $\text{CH}_2$ ), 125.81 (CH), 126.80 (CH), 128.03 (CH), 128.36 (CH), 139.10 (C), 140.65 (C), 173.74 (C), 173.83 (C) ppm. IR (ATR):  $\nu(\text{tilde}) = 2931$  (w), 2864 (w), 1733 (s), 1652 (vs), 1493 (m), 1454 (m), 1396 (m), 1300 (m), 1224 (m), 1183 (s), 1150 (m), 1098 (m), 1046 (m), 1025 (m), 765 (m), 738 (m)  $\text{cm}^{-1}$ . HR-MS (EI, 70 eV): calcd. 331.2142 (for  $\text{C}_{20}\text{H}_{29}\text{NO}_3^+$ ), found 310.2140 [ $\text{M}^+$ ].  $\text{C}_{20}\text{H}_{29}\text{NO}_3$  (331.46  $\text{g mol}^{-1}$ ).

**Ethyl 6-(hexylamino)-2-(2-iodophenyl)-6-oxohexanoate (25c).**  $^1\text{H-NMR}$  (500 MHz,  $\text{CDCl}_3$ ):  $\delta = 0.88$  (t,  $J = 7.0$  Hz, 3H), 1.21 (t,  $J = 7.1$  Hz, 3H), 1.28–1.33 (m, 6H), 1.45–1.49 (m, 2H), 1.62–1.68 (m, 2H), 1.73–1.80 (m, 1H), 2.00–2.07 (m, 1H), 2.19 (t,  $J = 7.5$  Hz, 2H), 3.22 (q,  $J = 7.0$  Hz, 2H), 4.02 (dd,  $J = 8.1$  Hz,  $J = 6.7$  Hz, 1H), 4.08–4.19 (m, 2H), 5.49 (br s, 1H), 6.91–6.96 (m, 1H), 7.30–7.31 (m, 2H), 7.85 (d,  $J = 7.9$  Hz, 1H) ppm.  $^{13}\text{C}\{^1\text{H}\}\text{-NMR}$  (125 MHz,  $\text{CDCl}_3$ ):  $\delta = 14.02$  ( $\text{CH}_3$ ), 14.10 ( $\text{CH}_3$ ), 22.55

(CH<sub>2</sub>), 23.55 (CH<sub>2</sub>), 26.59 (CH<sub>2</sub>), 29.58 (CH<sub>2</sub>), 31.47 (CH<sub>2</sub>), 32.94 (CH<sub>2</sub>), 36.41 (CH<sub>2</sub>), 39.53 (CH<sub>2</sub>), 54.70 (CH), 61.01 (CH<sub>2</sub>), 101.64 (C), 127.69 (CH), 128.67 (CH), 128.85 (CH), 139.77 (CH), 141.91 (C), 172.16 (C), 173.30 (C) ppm. IR (ATR):  $\tilde{\nu}$  = 3276 (w), 2929 (s), 2861 (m), 1733 (vs), 1642 (vs), 1549 (s), 1465 (s), 1437 (m), 1370 (m), 1178 (m), 1150 (s), 1010 (s), 747 (s) cm<sup>-1</sup>. HR-MS (EI, 70 eV): calcd. 459.1265 (for C<sub>20</sub>H<sub>30</sub>INO<sub>3</sub><sup>+</sup>), found 459.1262 [M<sup>+</sup>]. C<sub>20</sub>H<sub>30</sub>INO<sub>3</sub> (459.37 g mol<sup>-1</sup>).

**Ethyl 6-(hexylamino)-6-oxo-2-phenylhexanoate (24c).** <sup>1</sup>H-NMR (500 MHz, CDCl<sub>3</sub>):  $\delta$  = 0.86–0.88 (m, 3H), 1.19 (t, *J* = 7.1 Hz, 3H), 1.25–1.32 (m, 6H), 1.43–1.49 (m, 2H), 1.53–1.66 (m, 2H), 1.73–1.82 (m, 1H), 2.03–2.12 (m, 1H), 2.12–2.17 (m, 2H), 3.19–3.23 (m, 2H), 3.52 (t, *J* = 7.6 Hz, 1H), 4.07 (dq, *J* = 10.8 Hz, *J* = 7.1 Hz, 1H), 4.14 (dq, *J* = 10.8 Hz, *J* = 7.1 Hz, 1H), 5.48 (br s, 1H), 7.22–7.32 (m, 5H) ppm. <sup>13</sup>C{<sup>1</sup>H}-NMR (125 MHz, CDCl<sub>3</sub>):  $\delta$  = 13.99 (CH<sub>3</sub>), 14.09 (CH<sub>3</sub>), 22.52 (CH<sub>2</sub>), 23.72 (CH<sub>2</sub>), 26.56 (CH<sub>2</sub>), 29.55 (CH<sub>2</sub>), 31.44 (CH<sub>2</sub>), 33.05 (CH<sub>2</sub>), 36.39 (CH<sub>2</sub>), 39.50 (CH<sub>2</sub>), 51.55 (CH), 60.77 (CH<sub>2</sub>), 127.20 (CH), 127.80 (2 CH), 128.59 (2 CH), 138.94 (C), 172.22 (C), 173.88 (C) ppm. IR (ATR):  $\tilde{\nu}$  = 3294 (w), 2954 (m), 2927 (m), 2857 (m), 1732 (vs), 1641 (vs), 1549 (m), 1455 (m), 1175 (m), 1148 (m), 1026 (m), 732 (m), 698 (s) cm<sup>-1</sup>. HR-MS (EI, 70 eV): calcd. 333.2298 (for C<sub>20</sub>H<sub>31</sub>NO<sub>3</sub><sup>+</sup>), found 333.2297 [M<sup>+</sup>]. C<sub>20</sub>H<sub>31</sub>NO<sub>3</sub> (333.47 g mol<sup>-1</sup>).

**Conversion of  $\beta$ -oxoester 20a with cyclohexylamine.** According to GPB,  $\beta$ -oxoester **20a** (179 mg, 500  $\mu$ mol), K<sub>3</sub>PO<sub>4</sub> (212 mg, 1.00 mmol) and CuI (14 mg, 75  $\mu$ mol) were converted with cyclohexylamine (0.5 mL). The crude mixture was separated by column chromatography (SiO<sub>2</sub>, hexanes/MTBE 1:2) to yield the benzofuran **23a** (13 mg, 56  $\mu$ mol, 11%, *R*<sub>f</sub> = 0.65) as a pale yellow oil in the first fraction. Secondly, the benzazocinone **18d** (83 mg, 0.25 mmol, 50%, *R*<sub>f</sub> = 0.31) was eluted as a colorless solid, mp 120–123 °C. As third fraction, the acyclic amide **24d** (22 mg, 66  $\mu$ mol, 13%, *R*<sub>f</sub> = 0.19) was obtained as a colorless oil.

**Ethyl 1-cyclohexyl-2-oxo-1,2,3,4,5,6-hexahydrobenzo[*b*]azocine-6-carboxylate (18d).** <sup>1</sup>H-NMR (500 MHz, CDCl<sub>3</sub>):  $\delta$  = 0.97–1.05 (m, 2H), 1.17 (t, *J* = 7.1 Hz, 3H), 1.33–1.39 (m, 1H), 1.43–1.53 (m, 3H), 1.55–1.60 (m, 1H), 1.68–1.70 (m, 2H), 1.77–1.84 (m, 3H), 1.86–1.92 (m, 1H), 2.14–2.23 (m, 2H), 2.40–2.44 (m, 1H), 3.63 (d, *J* = 11.1 Hz, 1H), 4.09 (dq, *J* = 10.7 Hz, *J* = 7.2 Hz, 1H), 4.16 (dq, *J* = 10.7 Hz, *J* = 7.2

Hz, 1H), 4.56 (tt,  $J = 12.0$  Hz,  $J = 3.5$  Hz, 1H), 7.20–7.21 (m, 1H), 7.27–7.30 (m, 1H), 7.32–7.37 (m, 2H) ppm.  $^{13}\text{C}\{^1\text{H}\}$ -NMR (125 MHz,  $\text{CDCl}_3$ ):  $\delta = 13.89$  ( $\text{CH}_3$ ), 24.43 ( $\text{CH}_2$ ), 25.45 ( $\text{CH}_2$ ), 25.80 ( $\text{CH}_2$ ), 25.92 ( $\text{CH}_2$ ), 29.97 ( $\text{CH}_2$ ), 32.15 ( $\text{CH}_2$ ), 32.78 ( $\text{CH}_2$ ), 33.57 ( $\text{CH}_2$ ), 44.86 (CH), 55.36 (CH), 60.77 ( $\text{CH}_2$ ), 126.81 (CH), 127.30 (CH), 127.82 (CH), 128.85 (CH), 138.30 (C), 140.51 (C), 173.77 (C), 173.84 (C) ppm. IR (ATR):  $\nu(\text{tilde}) = 2930$  (m), 2856 (w), 1732 (vs), 1645 (vs), 1492 (m), 1446 (m), 1369 (m), 1302 (m), 1222 (m), 1186 (s), 1143 (m), 1024 (m), 769 (m), 745 (m)  $\text{cm}^{-1}$ . HR-MS (EI, 70 eV): calcd. 329.1985 (for  $\text{C}_{20}\text{H}_{27}\text{NO}_3^+$ ), found 329.1985 [ $\text{M}^+$ ].  $\text{C}_{20}\text{H}_{27}\text{NO}_3$  (329.44  $\text{g mol}^{-1}$ ).

**Ethyl 6-(cyclohexylamino)-6-oxo-2-phenylhexanoate (24d).**  $^1\text{H}$ -NMR (500 MHz,  $\text{CDCl}_3$ ):  $\delta = 1.04$ – $1.15$  (m, 3H), 1.19 (t,  $J = 7.1$  Hz, 3H), 1.29– $1.39$  (m, 2H), 1.55– $1.62$  (m, 3H), 1.67– $1.70$  (m, 2H), 1.74– $1.81$  (m, 1H), 1.87– $1.89$  (m, 2H), 2.03– $2.10$  (m, 1H), 2.13 (t,  $J = 7.9$  Hz, 2H), 3.52 (t,  $J = 7.6$  Hz, 1H), 3.70– $3.77$  (m, 1H), 4.07 (dq,  $J = 10.8$  Hz,  $J = 7.1$  Hz, 1H), 4.14 (dq,  $J = 10.8$  Hz,  $J = 7.1$  Hz, 1H), 5.35 (br d,  $J = 7.6$  Hz, 1H), 7.22– $7.26$  (m, 1H), 7.27– $7.32$  (m, 4H) ppm.  $^{13}\text{C}\{^1\text{H}\}$ -NMR (125 MHz,  $\text{CDCl}_3$ ):  $\delta = 14.08$  ( $\text{CH}_3$ ), 23.75 ( $\text{CH}_2$ ), 24.84 (2  $\text{CH}_2$ ), 25.49 ( $\text{CH}_2$ ), 32.99 ( $\text{CH}_2$ ), 33.18 (2  $\text{CH}_2$ ), 36.53 ( $\text{CH}_2$ ), 48.08 (CH), 51.54 (CH), 60.76 ( $\text{CH}_2$ ), 127.20 (CH), 127.80 (2 CH), 128.59 (2 CH), 138.95 (C), 171.36 (C), 173.88 (C) ppm. IR (ATR):  $\nu(\text{tilde}) = 3288$  (w), 2929 (s), 2853 (m), 1731 (vs), 1637 (vs), 1544 (s), 1451 (m), 1146 (s), 1027 (m), 733 (m), 698 (s)  $\text{cm}^{-1}$ . HR-MS (EI, 70 eV): calcd. 331.2142 (for  $\text{C}_{20}\text{H}_{29}\text{NO}_3^+$ ), found 331.2135 [ $\text{M}^+$ ].  $\text{C}_{20}\text{H}_{29}\text{NO}_3$  (331.46  $\text{g mol}^{-1}$ ).

**Conversion of  $\beta$ -oxoester 20a with allylamine.** According to GPB,  $\beta$ -oxoester **20a** (179 mg, 500  $\mu\text{mol}$ ),  $\text{K}_3\text{PO}_4$  (212 mg, 1.00 mmol) and CuI (14 mg, 75  $\mu\text{mol}$ ) were converted with allylamine (0.5 mL). The crude product was purified by column chromatography ( $\text{SiO}_2$ , hexanes/MTBE 1:2) to yield the benzazocinone **18e** (70 mg, 0.24 mmol, 49%,  $R_f = 0.28$ ) as a colorless oil. As second fraction, the acyclic amide **24e** (30 mg, 0.10 mmol, 20%,  $R_f = 0.12$ ) was obtained as a colorless oil.

**Ethyl 1-allyl-2-oxo-1,2,3,4,5,6-hexahydrobenzo[*b*]azocine-6-carboxylate (18e).**  $^1\text{H}$ -NMR (500 MHz,  $\text{CDCl}_3$ ):  $\delta = 1.17$  (t,  $J = 7.0$  Hz, 3H), 1.51– $1.60$  (m, 1H), 1.77– $1.94$  (m, 3H), 2.25– $2.29$  (m, 1H), 2.42– $2.46$  (m, 1H), 3.52 (d,  $J = 11.2$  Hz, 1H), 4.05– $4.18$  (m, 3H), 4.76 (dd,  $J = 14.4$  Hz,  $J = 6.3$  Hz, 1H), 5.10 (d,  $J = 10.1$  Hz, 1H), 5.15

(d,  $J = 17.1$  Hz, 1H), 5.86–5.94 (m, 1H), 7.20–7.33 (m, 4H) ppm.  $^{13}\text{C}\{^1\text{H}\}$ -NMR (125 MHz,  $\text{CDCl}_3$ ):  $\delta = 13.96$  ( $\text{CH}_3$ ), 24.28 ( $\text{CH}_2$ ), 32.01 ( $\text{CH}_2$ ), 33.06 ( $\text{CH}_2$ ), 44.78 (CH), 51.74 ( $\text{CH}_2$ ), 60.84 ( $\text{CH}_2$ ), 118.78 ( $\text{CH}_2$ ), 125.96 (CH), 126.95 (CH), 127.99 (CH), 128.57 (CH), 132.19 (CH), 139.04 (C), 140.48 (C), 173.81 (C), 173.82 (C) ppm. IR (ATR):  $\nu(\text{tilde}) = 2979$  (w), 2935 (w), 1731 (vs), 1651 (vs), 1493 (m), 1454 (m), 1389 (m), 1225 (m), 1185 (s), 1150 (m), 1098 (m), 765 (m), 739 (m)  $\text{cm}^{-1}$ . HR-MS (ESI): calcd. 287.1516 (for  $\text{C}_{17}\text{H}_{21}\text{NO}_3^+$ ), found 287.1518 [ $\text{M}^+$ ].  $\text{C}_{17}\text{H}_{21}\text{NO}_3$  (287.36  $\text{g mol}^{-1}$ ).

**Ethyl 6-(allylamino)-6-oxo-2-phenylhexanoate (24e).**  $^1\text{H}$ -NMR (500 MHz,  $\text{CDCl}_3$ ):  $\delta = 1.16$  (t,  $J = 7.1$  Hz, 3H), 1.51–1.65 (m, 2H), 1.77 (dddd,  $J = 13.3$  Hz,  $J = 10.2$  Hz,  $J = 7.3$  Hz,  $J = 5.8$  Hz, 1H), 2.05 (dddd,  $J = 13.3$  Hz,  $J = 10.5$  Hz,  $J = 7.9$  Hz,  $J = 5.5$  Hz, 1H), 2.13–2.19 (m, 2H), 3.50 (t,  $J = 7.6$  Hz, 1H), 3.82 (tt,  $J = 5.7$  Hz,  $J = 1.4$  Hz, 2H), 4.01–4.14 (m, 2H), 5.08 (dq,  $J = 10.2$  Hz,  $J = 1.4$  Hz, 1H), 5.12 (dq,  $J = 17.2$  Hz,  $J = 1.6$  Hz, 1H), 5.59 (br s, 1H), 5.78 (ddt,  $J = 17.2$  Hz,  $J = 10.2$  Hz,  $J = 5.7$  Hz, 1H), 7.19–7.29 (m, 5H) ppm.  $^{13}\text{C}\{^1\text{H}\}$ -NMR (125 MHz,  $\text{CDCl}_3$ ):  $\delta = 14.06$  ( $\text{CH}_3$ ), 23.63 ( $\text{CH}_2$ ), 33.01 ( $\text{CH}_2$ ), 36.23 ( $\text{CH}_2$ ), 41.86 ( $\text{CH}_2$ ), 51.53 (CH), 60.75 ( $\text{CH}_2$ ), 116.33 ( $\text{CH}_2$ ), 127.20 (CH), 127.80 (2 CH), 128.58 (2 CH), 134.21 (CH), 138.89 (C), 172.16 (C), 173.83 (C) ppm. IR (ATR):  $\nu(\text{tilde}) = 3288$  (w), 2929 (w), 1731 (vs), 1642 (vs), 1547 (s), 1457 (m), 1372 (m), 1269 (m), 1174 (s), 1152 (vs), 1026 (m), 920 (m), 734 (m), 700 (vs)  $\text{cm}^{-1}$ . HR-MS (EI, 70 eV): calcd. 289.1672 (for  $\text{C}_{17}\text{H}_{23}\text{NO}_3^+$ ), found 289.1669 [ $\text{M}^+$ ].  $\text{C}_{17}\text{H}_{23}\text{NO}_3$  (289.38  $\text{g mol}^{-1}$ ).

**Ethyl 1-(2-ethoxyethyl)-2-oxo-1,2,3,4,5,6-hexahydrobenzo[*b*]azocine-6-carboxylate (18f).** According to GPB,  $\beta$ -oxoester **20a** (179 mg, 500  $\mu\text{mol}$ ),  $\text{K}_3\text{PO}_4$  (212 mg, 1.00 mmol) and CuI (14 mg, 75  $\mu\text{mol}$ ) were converted with 2-ethoxyethylamine (0.5 mL). The crude product was purified by column chromatography ( $\text{SiO}_2$ , hexanes/MTBE 5:1) to yield the benzazocinone **18f** (60 mg, 0.19 mmol, 38%,  $R_f = 0.26$ ) as a colorless oil.  $^1\text{H}$ -NMR (500 MHz,  $\text{CDCl}_3$ ):  $\delta = 1.12$  (t,  $J = 7.0$  Hz, 3H), 1.17 (t,  $J = 7.1$  Hz, 3H), 1.53 (dddd,  $J = 14.3$  Hz,  $J = 12.3$  Hz,  $J = 11.1$  Hz,  $J = 5.6$  Hz, 1H), 1.75–1.95 (m, 3H), 2.24 (dd,  $J = 11.4$  Hz,  $J = 8.1$  Hz, 1H), 2.44–2.48 (m, 1H), 3.41–3.47 (m, 2H), 3.50 (ddd,  $J = 9.2$  Hz,  $J = 5.9$  Hz,  $J = 4.4$  Hz, 1H), 3.53–3.57 (m, 1H), 3.61 (ddd,  $J = 9.2$  Hz,  $J = 7.6$  Hz,  $J = 5.5$  Hz, 1H), 3.67 (dd,  $J = 11.1$  Hz,  $J = 1.0$  Hz, 1H), 4.08–4.18 (m, 2H), 4.49 (ddd,  $J = 13.4$  Hz,  $J = 7.6$  Hz,  $J = 5.9$  Hz, 1H), 7.29–7.31 (m, 3H), 7.31–7.35 (m, 1H) ppm.  $^{13}\text{C}\{^1\text{H}\}$ -NMR (125 MHz,  $\text{CDCl}_3$ ):  $\delta = 14.02$  ( $\text{CH}_3$ ), 15.01

(CH<sub>3</sub>), 24.34 (CH<sub>2</sub>), 32.14 (CH<sub>2</sub>), 33.06 (CH<sub>2</sub>), 44.54 (CH), 48.44 (CH<sub>2</sub>), 60.84 (CH<sub>2</sub>), 66.11 (CH<sub>2</sub>), 66.68 (CH<sub>2</sub>), 126.10 (CH), 127.05 (CH), 128.05 (CH), 128.47 (CH), 139.15 (C), 140.74 (C), 173.95 (C), 174.36 (C) ppm. IR (ATR):  $\nu(\text{tilde}) = 2972$  (w), 2942 (w), 2864 (w), 1730 (s), 1653 (vs), 1494 (m), 1454 (m), 1392 (m), 1300 (m), 1225 (m), 1186 (m), 1113 (s), 1045 (m), 1026 (m), 766 (m), 735 (m) cm<sup>-1</sup>. HR-MS (EI, 70 eV): calcd. 319.1778 (for C<sub>18</sub>H<sub>25</sub>NO<sub>4</sub><sup>+</sup>), found 319.1772 [M<sup>+</sup>]. C<sub>18</sub>H<sub>25</sub>NO<sub>4</sub> (319.40 g mol<sup>-1</sup>).

**Ethyl [1-(methoxycarbonyl)methyl]-2-oxo-1,2,3,4,5,6-hexahydrobenzo[*b*]azocine-6-carboxylate (18j).** According to GPC, benzazocinone **18g** (124 mg, 500  $\mu$ mol), *n*BuLi (0.21 mL, 2.5 mol L<sup>-1</sup> in hexanes, 0.53 mmol) and *i*Pr<sub>2</sub>NH (54 mg, 0.53 mmol) were converted with methyl bromoacetate (81 mg, 0.53 mmol) to yield the title compound **18j** (126 mg, 395  $\mu$ mol, 79%) after chromatography (SiO<sub>2</sub>, hexanes/MTBE 1:5, *R*<sub>f</sub> = 0.28) as a colorless solid, mp 100–104 °C. <sup>1</sup>H-NMR (500 MHz, CDCl<sub>3</sub>):  $\delta = 1.16$  (t, *J* = 7.1 Hz, 3H), 1.53 (dddd, *J* = 14.3 Hz, *J* = 12.9 Hz, *J* = 11.1 Hz, *J* = 5.4 Hz, 1H), 1.80 (td, *J* = 12.9 Hz, *J* = 5.4 Hz, 1H), 1.88–1.95 (m, 2H), 2.27 (dd, *J* = 12.3 Hz, *J* = 8.2 Hz, 1H), 2.47 (dd, *J* = 14.3 Hz, *J* = 5.4 Hz, 1H), 3.71 (s, 3H), 4.01 (dd, *J* = 11.1 Hz, *J* = 0.9 Hz, 1H), 4.06–4.17 (m, 2H), 4.35 (d, *J* = 17.0 Hz, 1H), 4.58 (d, *J* = 17.0 Hz, 1H), 7.24–7.30 (m, 3H), 7.33–7.35 (m, 1H) ppm. <sup>13</sup>C{<sup>1</sup>H}-NMR (125 MHz, CDCl<sub>3</sub>):  $\delta = 13.94$  (CH<sub>3</sub>), 24.19 (CH<sub>2</sub>), 32.15 (CH<sub>2</sub>), 32.53 (CH<sub>2</sub>), 44.44 (CH), 50.98 (CH<sub>2</sub>), 52.07 (CH<sub>3</sub>), 60.78 (CH<sub>2</sub>), 125.28 (CH), 127.49 (CH), 128.12 (CH), 128.68 (CH), 138.71 (C), 140.83 (C), 169.28 (C), 173.87 (C), 174.31 (C) ppm. IR (ATR):  $\nu(\text{tilde}) = 2973$  (w), 2952 (w), 1757 (s), 1716 (vs), 1649 (vs), 1496 (m), 1441 (m), 1384 (m), 1220 (s), 1196 (vs), 1095 (m), 1025 (m), 977 (m), 781 (m), 742 (m), 722 (m) cm<sup>-1</sup>. HR-MS (EI, 70 eV): calcd. 319.1414 (for C<sub>17</sub>H<sub>21</sub>NO<sub>5</sub><sup>+</sup>), found 319.1426 [M<sup>+</sup>]. C<sub>17</sub>H<sub>21</sub>NO<sub>5</sub> (319.36 g mol<sup>-1</sup>).

**Ethyl 1-[1-(ethoxycarbonyl)ethyl]-2-oxo-1,2,3,4,5,6-hexahydrobenzo[*b*]azocine-6-carboxylate (18k).** According to GPC, benzazocinone **18g** (124 mg, 500  $\mu$ mol) in abs. THF (1 mL), *n*BuLi (0.21 mL, 2.5 mol L<sup>-1</sup> in hexanes, 0.53 mmol) and *i*Pr<sub>2</sub>NH (54 mg, 0.53 mmol) were converted with ethyl 2-bromopropionate (96 mg, 0.53 mmol) to yield in a first fraction the title compound **18k** (59 mg, 0.17 mmol, 34%, *R*<sub>f</sub> = 0.32) after chromatography (SiO<sub>2</sub>, hexanes/EtOAc 1:1) as a colorless oil. The product **18k** was isolated as a mixture of two diastereomers (ratio 87:13 by <sup>1</sup>H-NMR). In the se-



cond fraction, starting material **18g** (45 mg, 0.18 mmol, 36%,  $R_f = 0.11$ ) was recovered.  $^1\text{H-NMR}$  (500 MHz,  $\text{CDCl}_3$ ), major diastereomer:  $\delta = 1.06\text{--}1.11$  (m, 3H), 1.19–1.25 (m, 6H), 1.42–1.53 (m, 1H), 1.65–1.77 (m, 1H), 1.80–1.89 (m, 2H), 2.18–2.23 (m, 1H), 2.35–2.39 (m, 1H), 3.64 (dd,  $J = 11.1$  Hz,  $J = 6.5$  Hz, 1H), 4.00–4.09 (m, 2H), 4.13–4.23 (m, 2H), 4.96–5.02 (m, 1H), 7.17–7.22 (m, 1H), 7.23–7.28 (m, 2H), 7.38–7.41 (m, 1H) ppm; minor diastereomer:  $\delta = 1.06\text{--}1.11$  (m, 3H), 1.19–1.25 (m, 3H), 1.42–1.53 (m, 4H), 1.65–1.89 (m, 3H), 2.11–2.17 (m, 1H), 2.35–2.39 (m, 1H), 3.74 (dd,  $J = 11.0$  Hz,  $J = 6.7$  Hz, 1H), 4.00–4.09 (m, 2H), 4.13–4.23 (m, 3H), 7.17–7.22 (m, 1H), 7.23–7.28 (m, 3H) ppm.  $^{13}\text{C}\{^1\text{H}\}\text{-NMR}$  (125 MHz,  $\text{CDCl}_3$ ), major diastereomer:  $\delta = 13.96$  ( $\text{CH}_3$ ), 14.15 ( $\text{CH}_3$ ), 15.02 ( $\text{CH}_3$ ), 24.31 ( $\text{CH}_2$ ), 32.01 ( $\text{CH}_2$ ), 33.13 ( $\text{CH}_2$ ), 44.69 (CH), 54.86 (CH), 60.87 ( $\text{CH}_2$ ), 61.28 ( $\text{CH}_2$ ), 126.90 (2 CH), 127.81 (CH), 129.11 (CH), 138.45 (C), 139.88 (C), 172.20 (C), 173.76 (C), 174.26 (C) ppm; minor diastereomer:  $\delta = 13.96$  ( $\text{CH}_3$ ), 14.30 ( $\text{CH}_3$ ), 14.91 ( $\text{CH}_3$ ), 24.13 ( $\text{CH}_2$ ), 32.05 ( $\text{CH}_2$ ), 33.06 ( $\text{CH}_2$ ), 44.80 (CH), 59.64 (CH), 60.91 ( $\text{CH}_2$ ), 61.20 ( $\text{CH}_2$ ), 126.53 (CH), 126.96 (CH), 128.21 (CH), 128.85 (CH), 139.27 (C), 140.46 (C), 171.01 (C), 173.41 (C), 173.82 (C) ppm. IR (ATR):  $\nu(\text{tilde}) = 2978$  (w), 2941 (w), 1731 (vs), 1656 (vs), 1494 (m), 1452 (m), 1371 (m), 1303 (m), 1226 (m), 1186 (s), 1090 (m), 1049 (m), 1022 (m), 768 (m), 738 (m)  $\text{cm}^{-1}$ . HR-MS (EI, 70 eV): calcd. 347.1727 (for  $\text{C}_{19}\text{H}_{25}\text{NO}_5^+$ ), found 347.1734 [ $\text{M}^+$ ].  $\text{C}_{19}\text{H}_{25}\text{NO}_5$  (347.41  $\text{g mol}^{-1}$ ).

**1-Benzyl-2-oxo-1,2,3,4,5,6-hexahydrobenzo[*b*]azocine-6-carboxylic acid *N*-[2-(ethoxycarbonyl)ethyl]amide (27b).** According to GPD, HATU (209 mg, 550  $\mu\text{mol}$ ), DIPEA (142 mg, 1.10 mmol) and  $\beta$ -alanine ethyl ester-hydrochloride (115 mg, 749  $\mu\text{mol}$ ) were converted with benzazocinone **26** (154 mg, 500  $\mu\text{mol}$ ) to yield the title compound **27b** (173 mg, 424  $\mu\text{mol}$ , 85%) after chromatography ( $\text{SiO}_2$ , hexanes/EtOAc 1:3,  $R_f = 0.33$ ) as a colorless oil.  $^1\text{H-NMR}$  (500 MHz,  $\text{CDCl}_3$ ):  $\delta = 1.20$  (t,  $J = 7.1$  Hz, 3H), 1.37 (dddd,  $J = 14.3$  Hz,  $J = 12.6$  Hz,  $J = 10.9$  Hz,  $J = 5.5$  Hz, 1H), 1.73 (dtdd,  $J = 14.6$  Hz,  $J = 12.7$  Hz,  $J = 5.5$  Hz,  $J = 1.8$  Hz, 1H), 1.83–1.93 (m, 2H), 2.26–2.32 (m, 4H), 2.57 (dd,  $J = 10.9$  Hz,  $J = 0.9$  Hz, 1H), 2.98 (dq,  $J = 13.1$  Hz,  $J = 7.0$  Hz, 1H), 3.18 (dq,  $J = 13.1$  Hz,  $J = 6.6$  Hz, 1H), 3.62 (br t,  $J = 5.8$  Hz, 1H), 3.99–4.09 (m, 2H), 4.13 (d,  $J = 13.7$  Hz, 1H), 6.00 (d,  $J = 13.7$  Hz, 1H), 7.22–7.27 (m, 4H), 7.28–7.31 (m, 3H), 7.31–7.36 (m, 2H) ppm.  $^{13}\text{C}\{^1\text{H}\}\text{-NMR}$  (125 MHz,  $\text{CDCl}_3$ ):  $\delta = 14.14$  ( $\text{CH}_3$ ), 24.42 ( $\text{CH}_2$ ), 31.54 ( $\text{CH}_2$ ), 33.11 ( $\text{CH}_2$ ), 33.70 ( $\text{CH}_2$ ), 35.11 ( $\text{CH}_2$ ), 45.19 (CH), 51.93 ( $\text{CH}_2$ ), 60.38 ( $\text{CH}_2$ ), 125.76 (CH), 127.20 (CH), 127.77 (CH), 128.09

(CH), 128.76 (CH), 128.83 (2 CH), 129.99 (2 CH), 136.79 (C), 139.22 (C), 140.20 (C), 171.43 (C), 172.98 (C), 173.79 (C) ppm. IR (ATR):  $\nu(\text{tilde}) = 3412$  (w), 3031 (w), 2939 (w), 2865 (w), 1731 (s), 1675 (s), 1650 (vs), 1513 (m), 1492 (m), 1452 (m), 1393 (m), 1181 (s), 1152 (m), 844 (m), 759 (m), 735 (m), 705 (s), 634 (m)  $\text{cm}^{-1}$ . HR-MS (EI, 70 eV): calcd. 408.2044 (for  $\text{C}_{24}\text{H}_{28}\text{N}_2\text{O}_4^+$ ), found 408.2039 [ $\text{M}^+$ ].  $\text{C}_{24}\text{H}_{28}\text{N}_2\text{O}_4$  (408.50  $\text{g mol}^{-1}$ ).

**1-Benzyl-2-oxo-1,2,3,4,5,6-hexahydrobenzo[*b*]azocine-6-carboxylic acid *N*-(2,2,2-trifluoroethyl)amide (27c).** According to GPD, HATU (209 mg, 550  $\mu\text{mol}$ ), DIPEA (71 mg, 0.55 mmol) and 2,2,2-trifluoroethylamine (74 mg, 0.75 mmol) were converted with benzazocinone **26** (154 mg, 500  $\mu\text{mol}$ ) to yield the title compound **27c** (172 mg, 441  $\mu\text{mol}$ , 88%) after chromatography ( $\text{SiO}_2$ , hexanes/EtOAc 1:1,  $R_f = 0.29$ ) as a colorless solid, mp 127–128  $^\circ\text{C}$ .  $^1\text{H-NMR}$  (500 MHz,  $\text{CDCl}_3$ ):  $\delta = 1.40$  (dddd,  $J = 14.4$  Hz,  $J = 12.8$  Hz,  $J = 10.9$  Hz,  $J = 5.5$  Hz, 1H), 1.70–1.79 (m, 1H), 1.85–1.94 (m, 2H), 2.30–2.34 (m, 2H), 2.65 (dd,  $J = 10.9$  Hz,  $J = 0.9$  Hz, 1H), 3.25 (dq,  $J = 14.8$  Hz,  $J = 9.0$  Hz,  $J = 5.8$  Hz, 1H), 3.42 (br t,  $J = 6.6$  Hz, 1H), 3.67 (dq,  $J = 14.8$  Hz,  $J = 9.1$  Hz,  $J = 7.5$  Hz, 1H), 4.09 (d,  $J = 13.7$  Hz, 1H), 6.08 (d,  $J = 13.7$  Hz, 1H), 7.21 (dd,  $J = 7.9$  Hz,  $J = 1.1$  Hz, 1H), 7.25–7.28 (m, 6H), 7.35–7.40 (m, 2H) ppm.  $^{13}\text{C}\{^1\text{H}\}$ -NMR (125 MHz,  $\text{CDCl}_3$ ):  $\delta = 24.31$  ( $\text{CH}_2$ ), 31.45 ( $\text{CH}_2$ ), 33.06 ( $\text{CH}_2$ ), 40.20 (q,  $^2J_{\text{CF}} = 34.8$  Hz,  $\text{CH}_2$ ), 45.23 (CH), 51.79 ( $\text{CH}_2$ ), 123.68 (q,  $^1J_{\text{CF}} = 279.1$  Hz, C), 125.83 (CH), 127.16 (CH), 127.57 (CH), 128.47 (CH), 128.83 (2 CH), 128.92 (CH), 130.09 (2 CH), 136.87 (C), 139.08 (C), 139.30 (C), 173.08 (C), 173.64 (C) ppm.  $^{19}\text{F}\{^1\text{H}\}$ -NMR (470 MHz,  $\text{CDCl}_3$ ):  $\delta = -72.10$  (s,  $\text{CF}_3$ ) ppm. IR (ATR):  $\nu(\text{tilde}) = 3410$  (m), 2969 (w), 2948 (w), 2865 (w), 1690 (s), 1644 (vs), 1598 (m), 1514 (m), 1493 (m), 1454 (m), 1438 (m), 1392 (s), 1276 (s), 1228 (m), 1195 (m), 1162 (s), 1144 (vs), 1083 (m), 989 (m), 833 (m), 780 (m), 764 (s), 733 (s), 711 (s), 664 (m), 633 (s)  $\text{cm}^{-1}$ . HR-MS (EI, 70 eV): calcd. 390.1550 (for  $\text{C}_{21}\text{H}_{21}\text{F}_3\text{N}_2\text{O}_2^+$ ), found 390.1541 [ $\text{M}^+$ ].  $\text{C}_{21}\text{H}_{21}\text{F}_3\text{N}_2\text{O}_2$  (390.41  $\text{g mol}^{-1}$ ).

7.94  
7.91  
7.30  
7.25  
6.97  
6.92

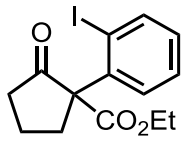

compound **20a**

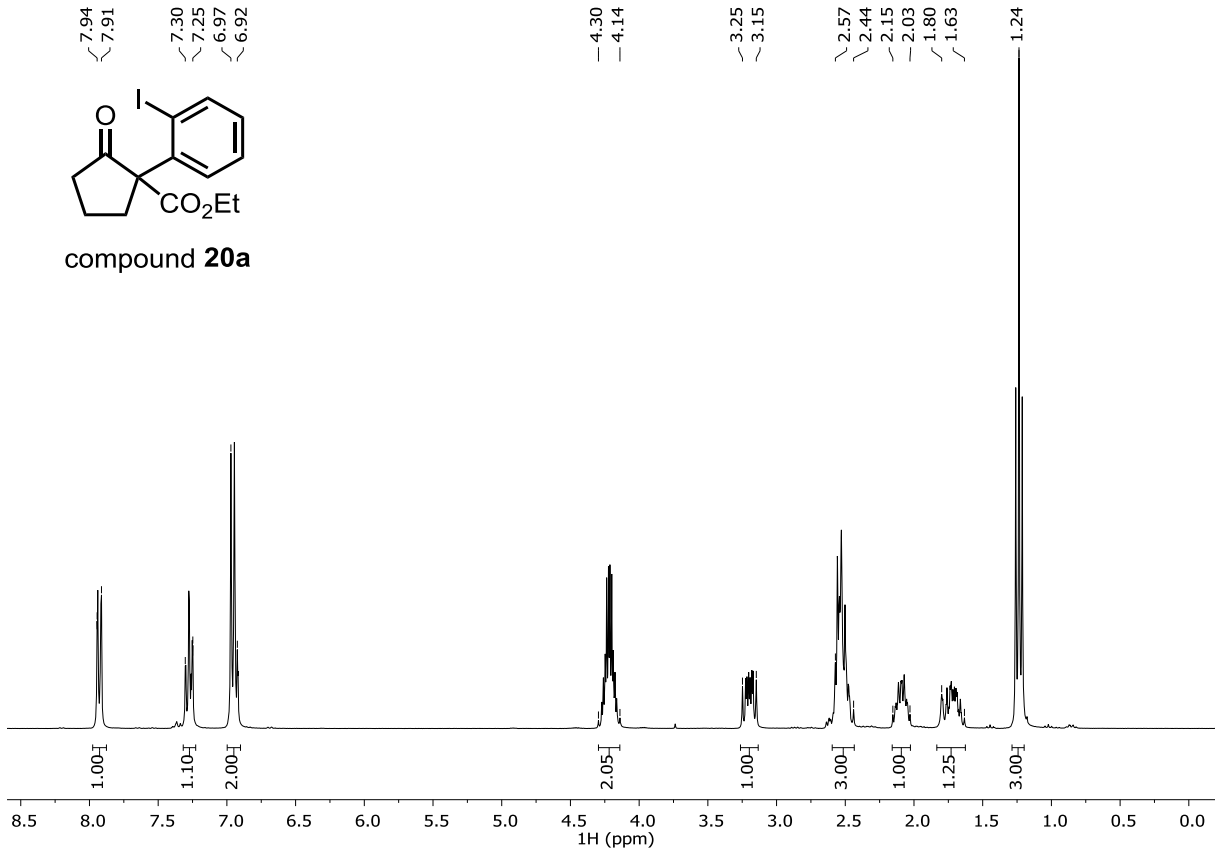

7.97  
7.95  
7.33  
7.06  
7.04  
6.96

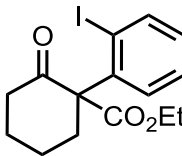

compound **20b**

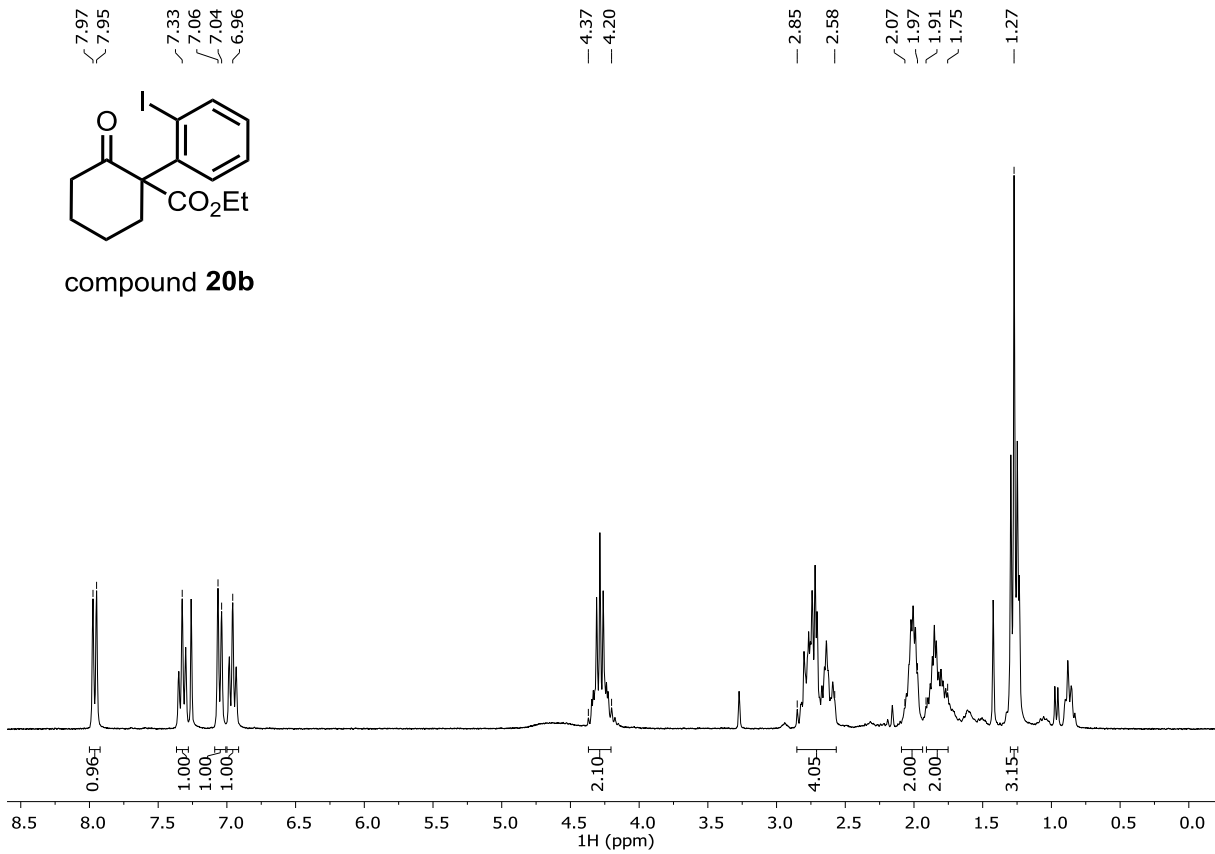

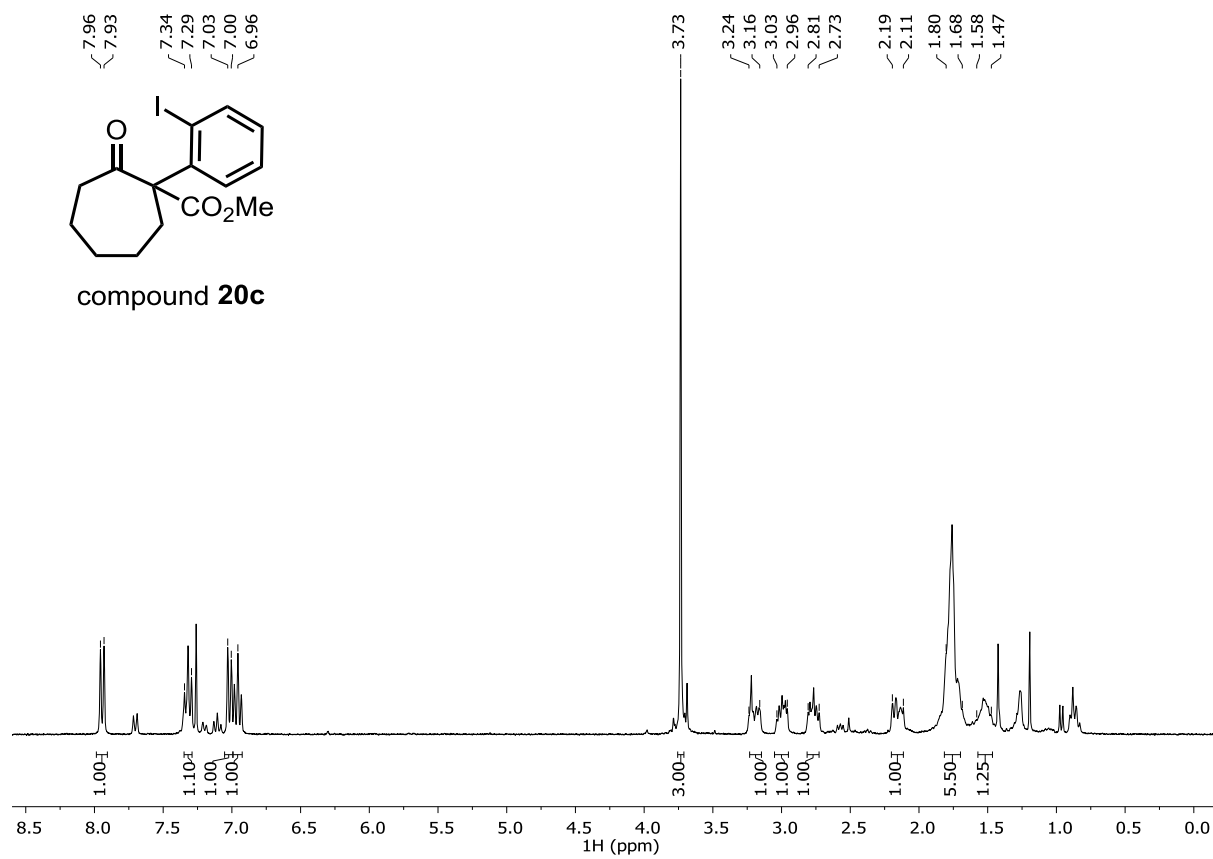

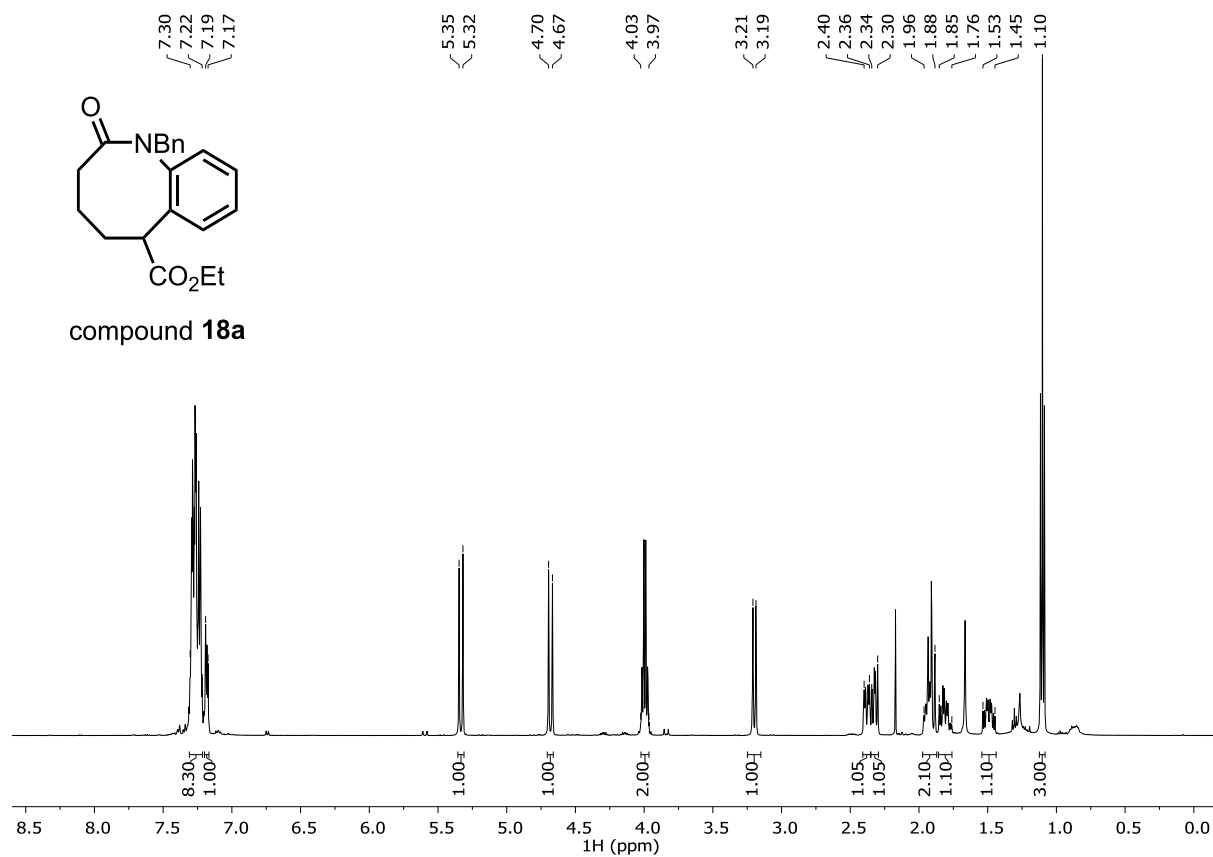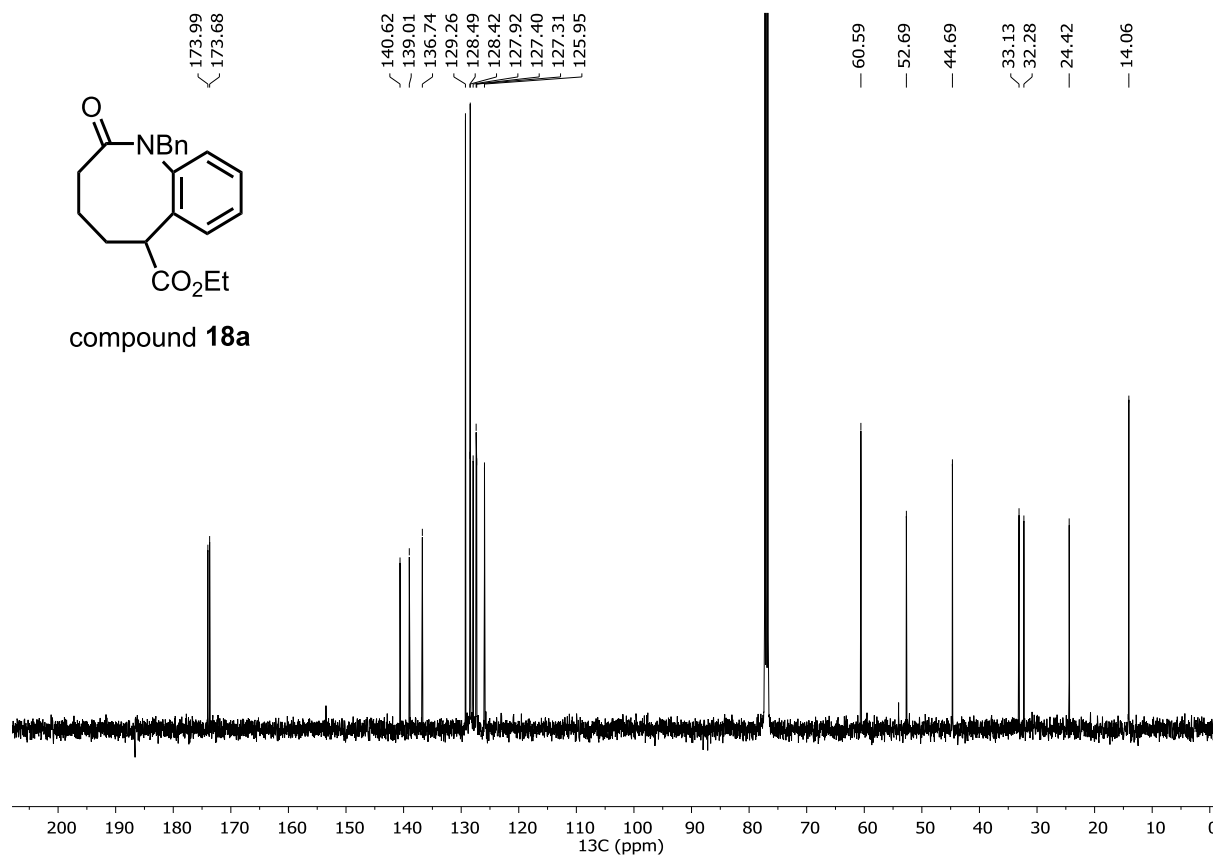

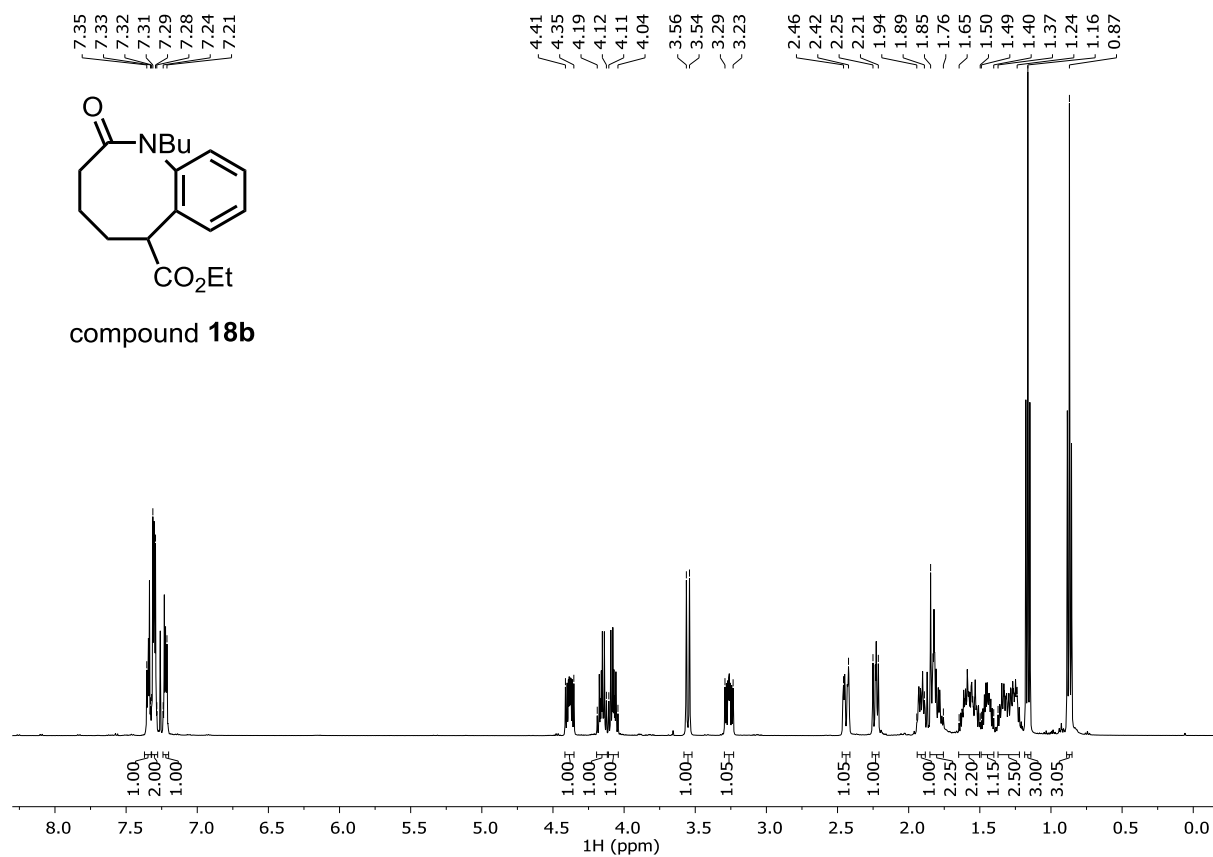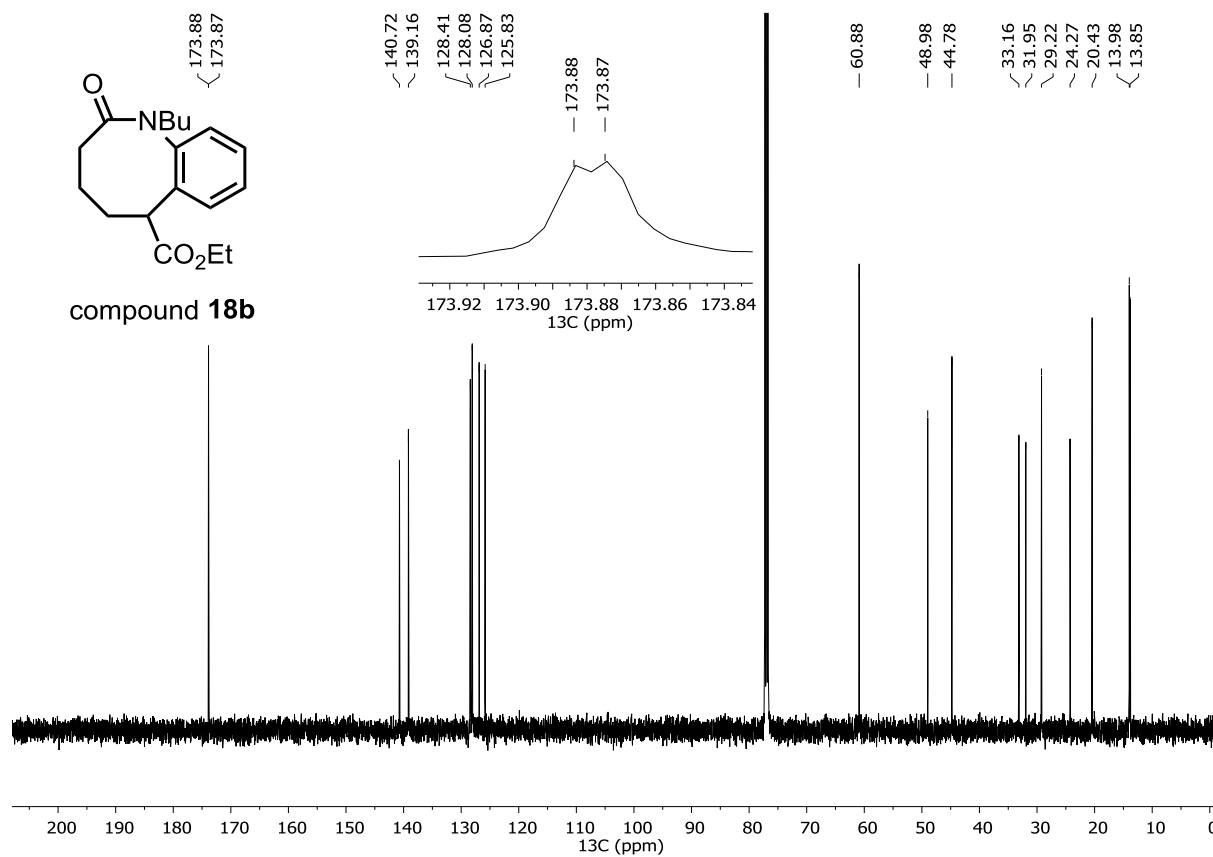

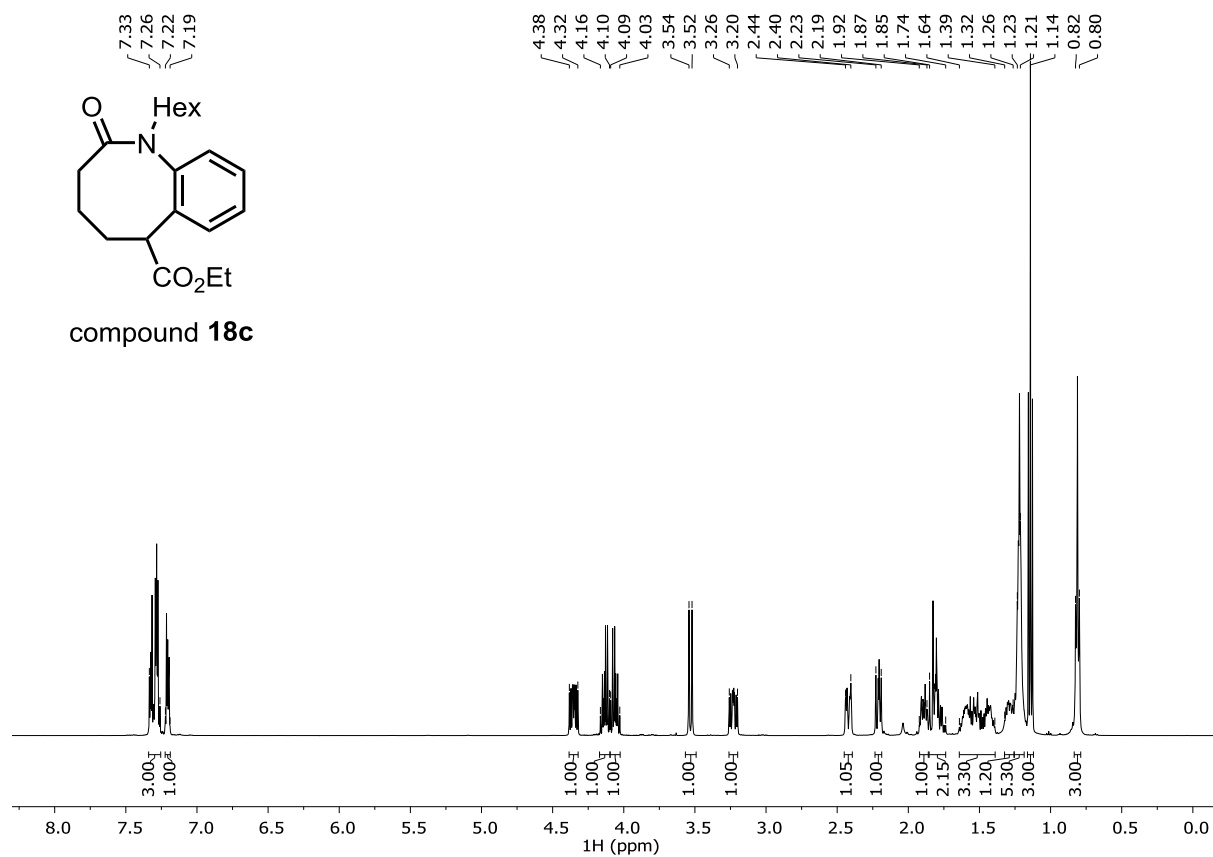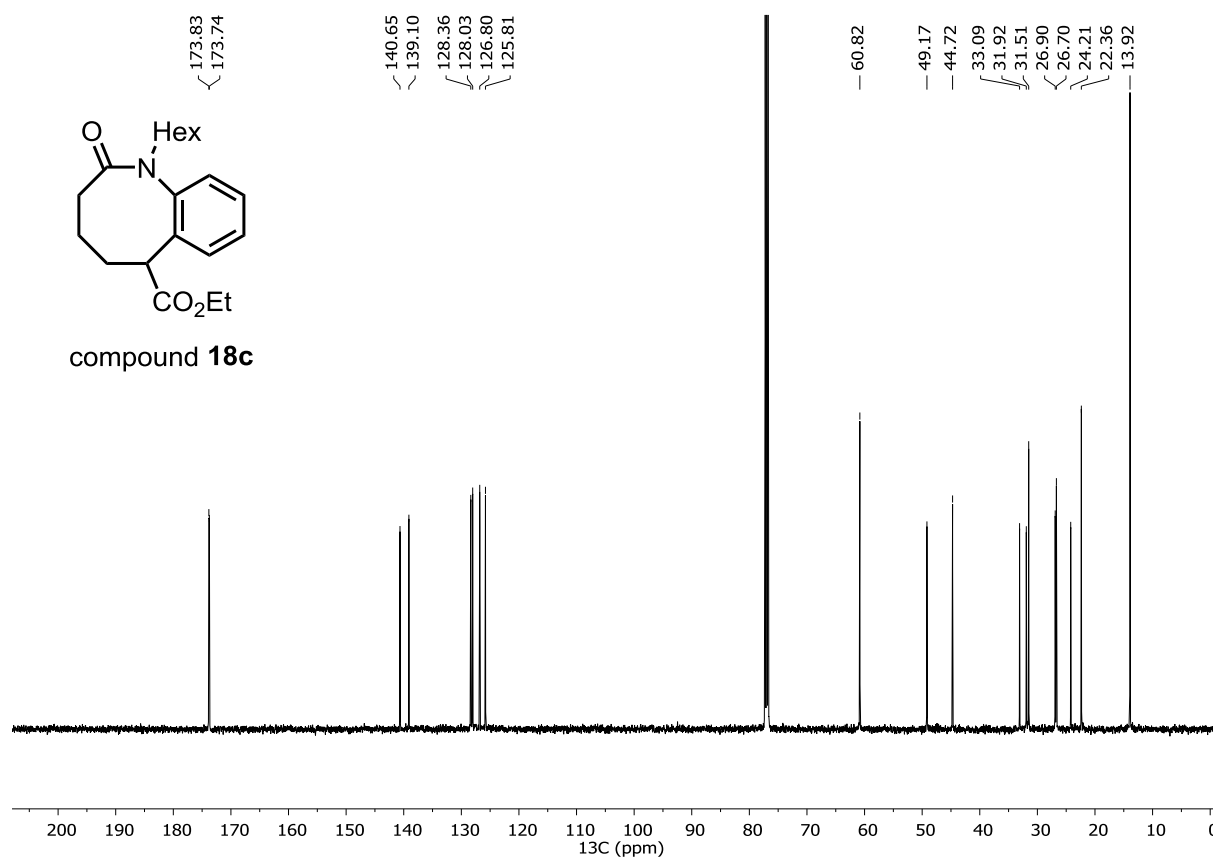

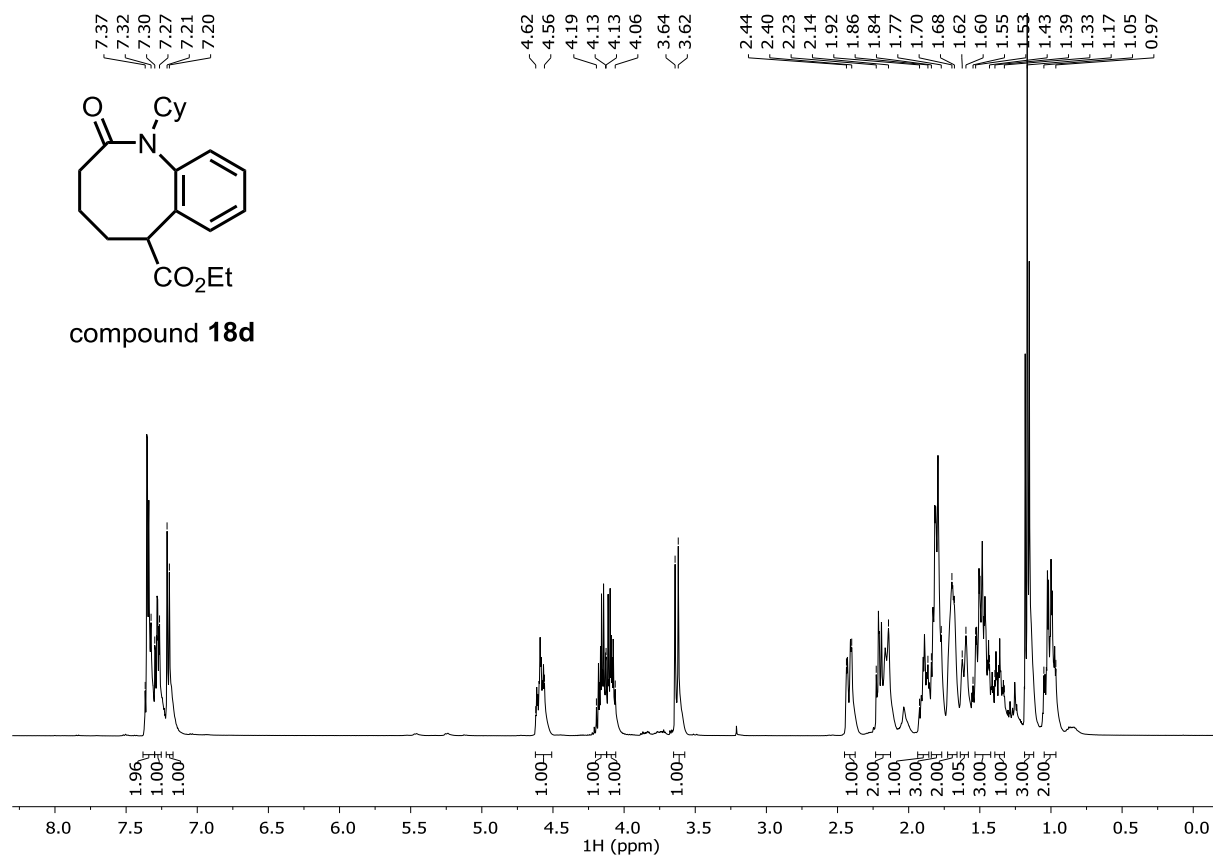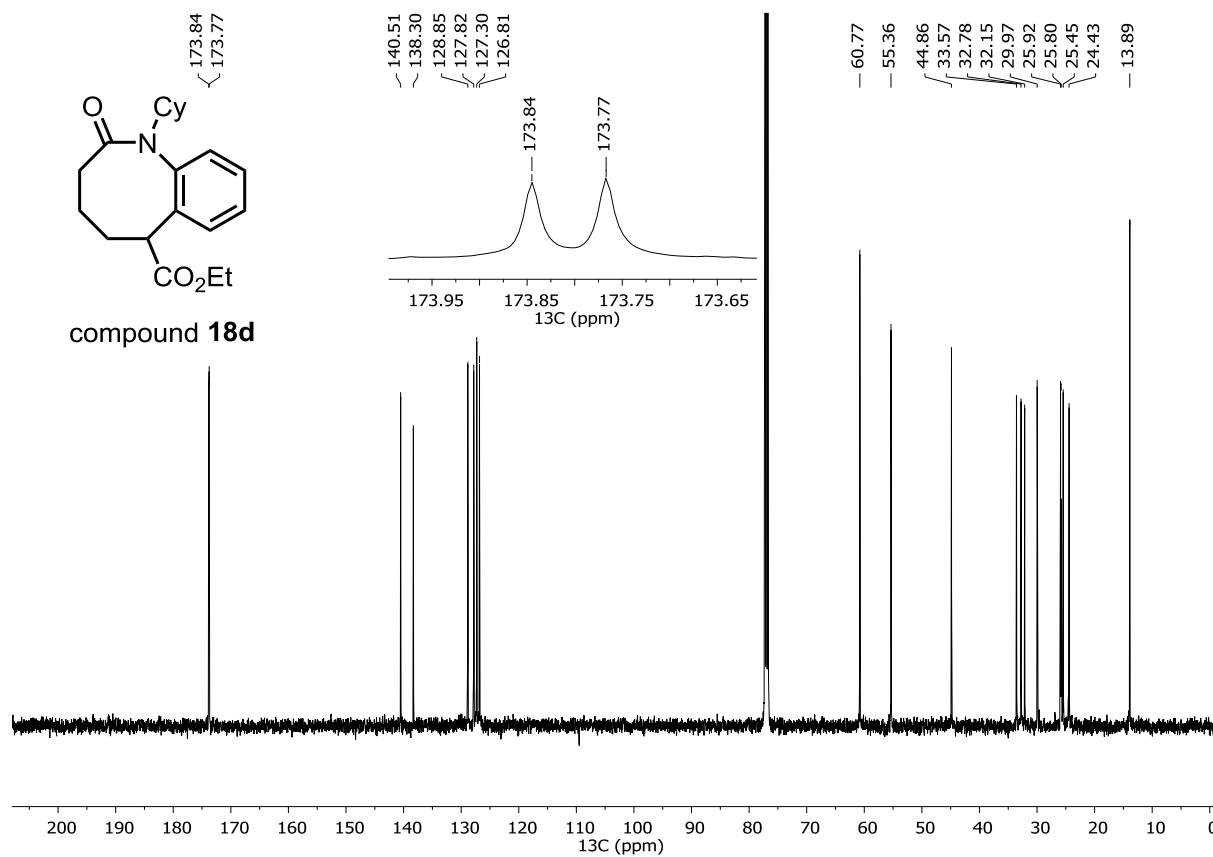



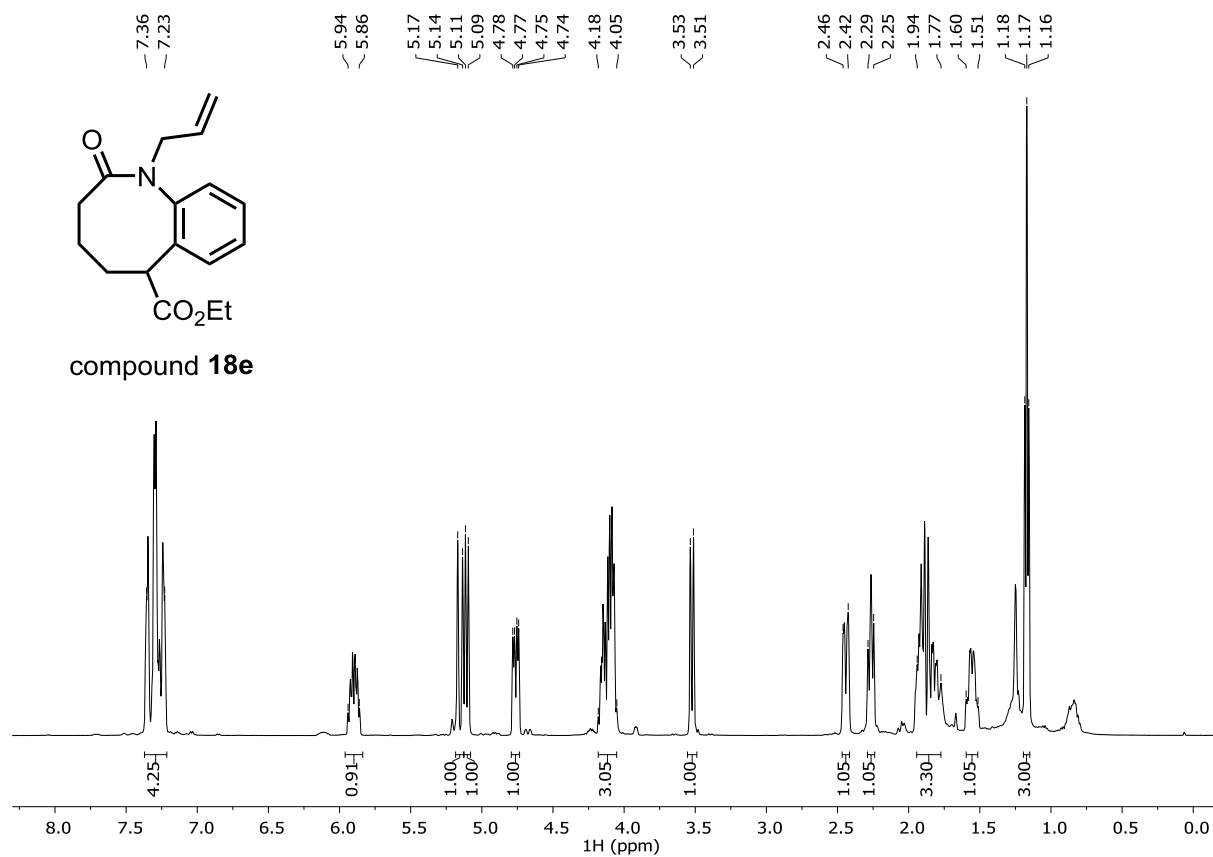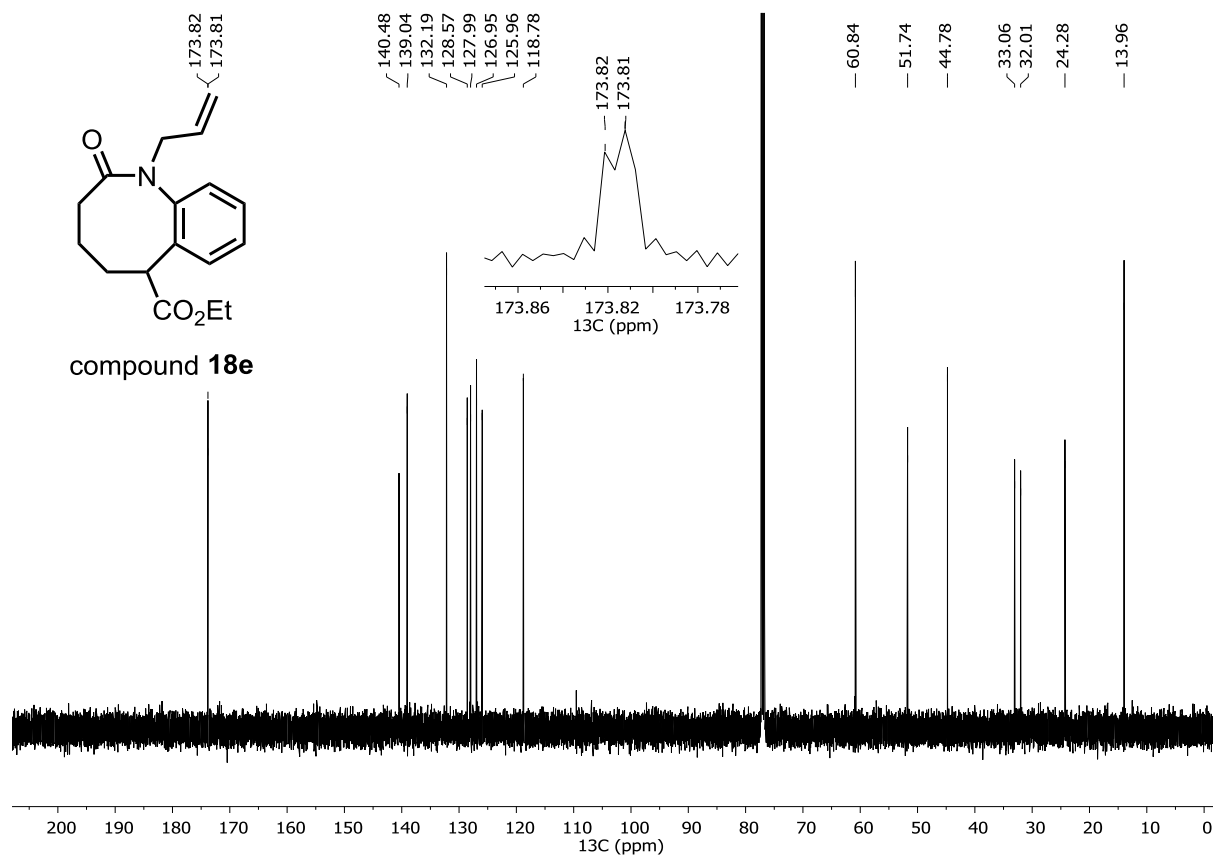



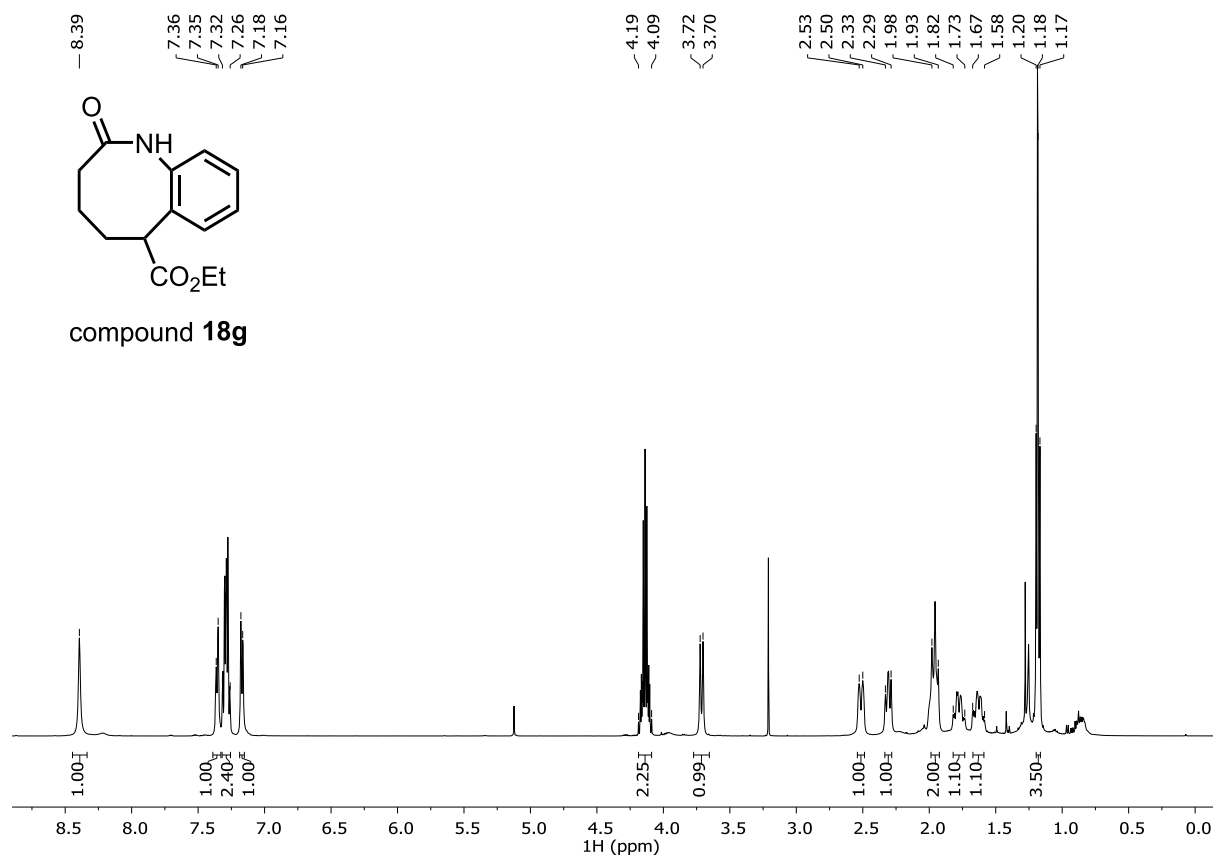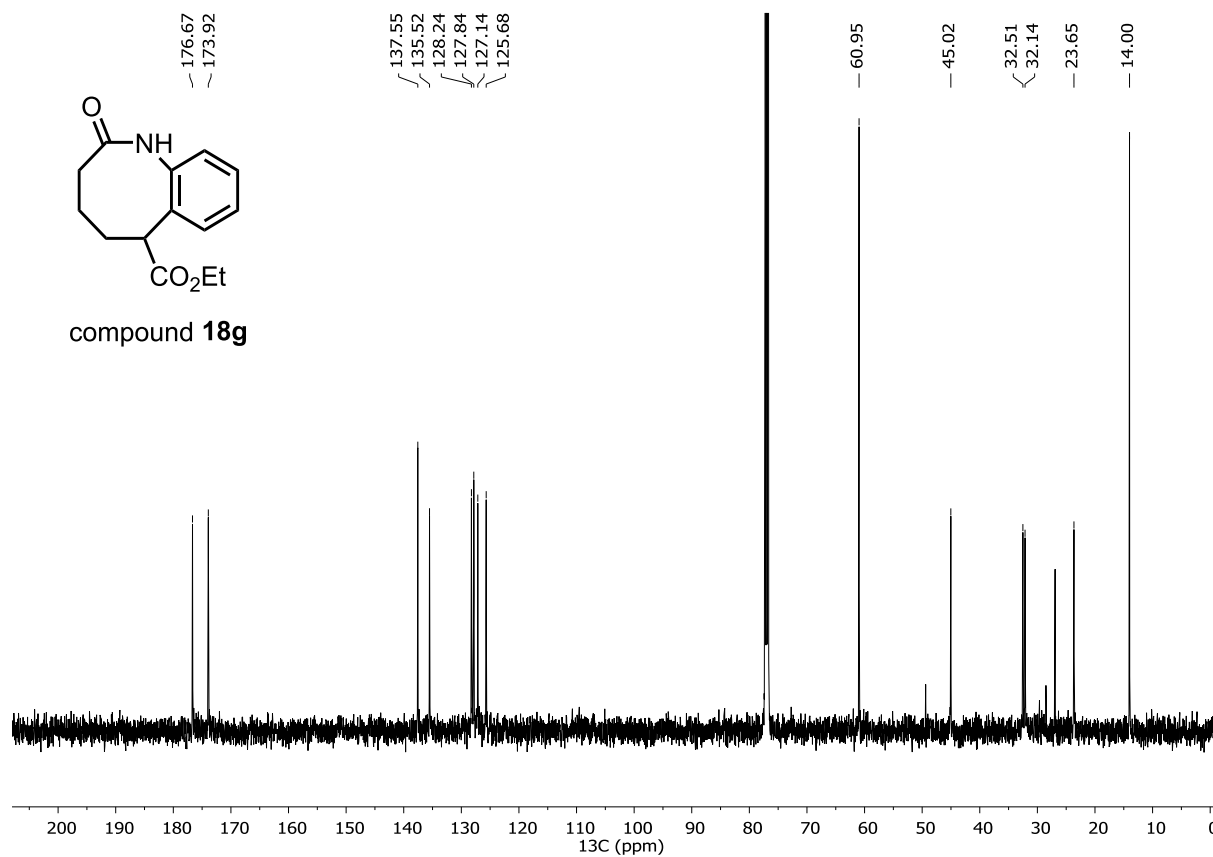

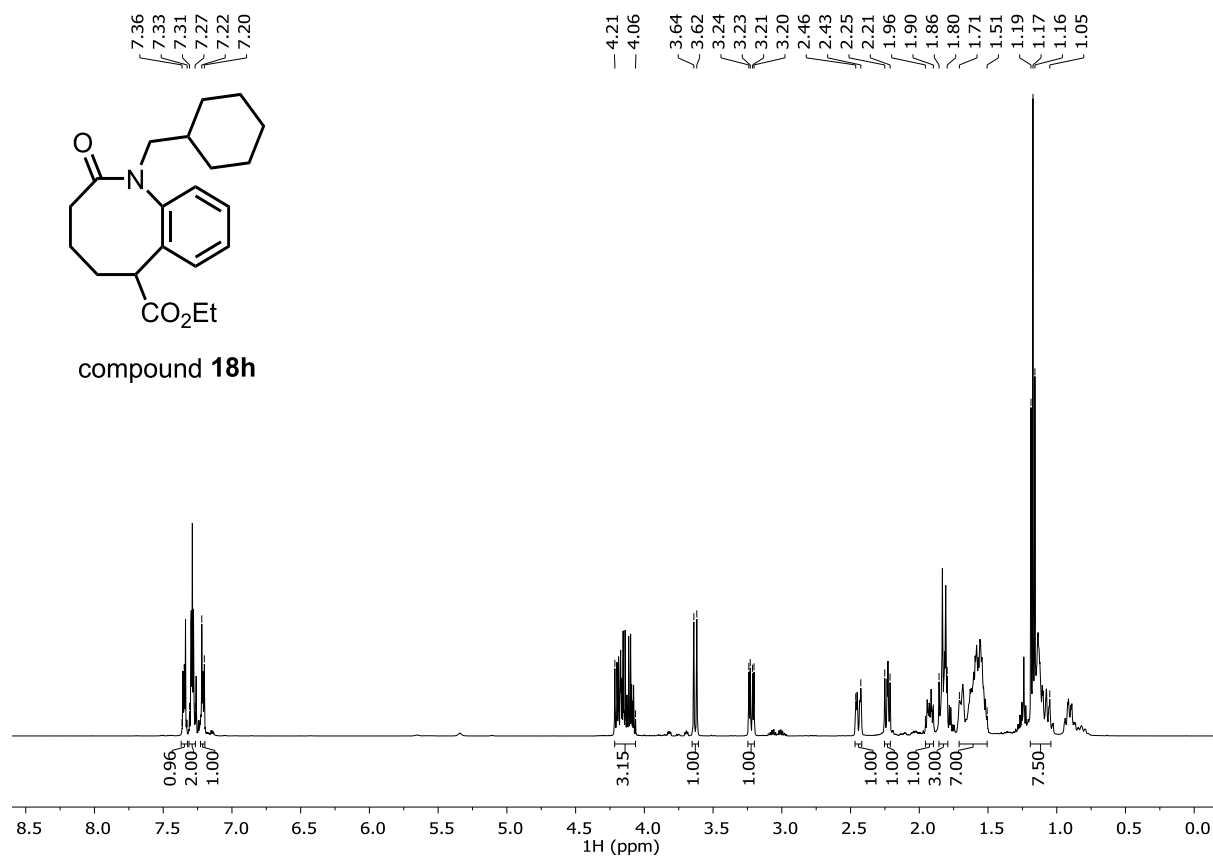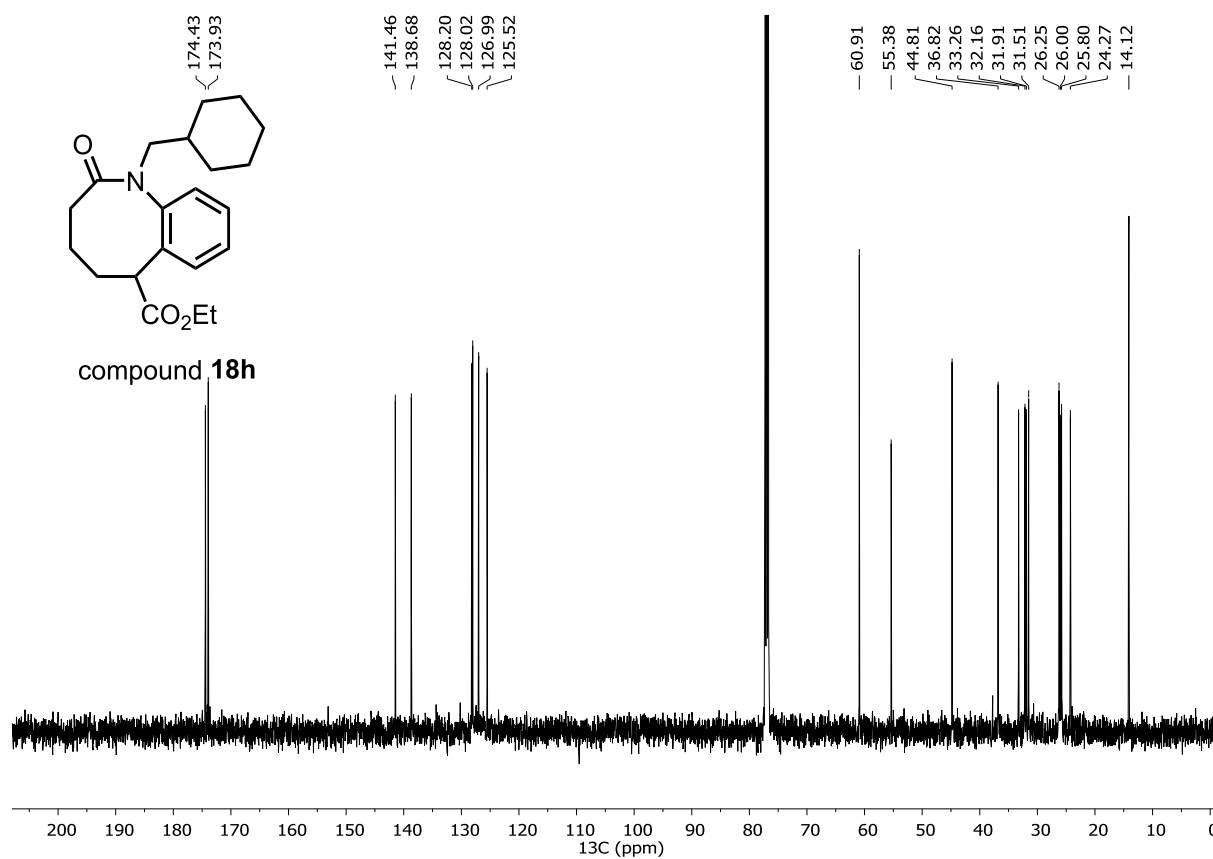

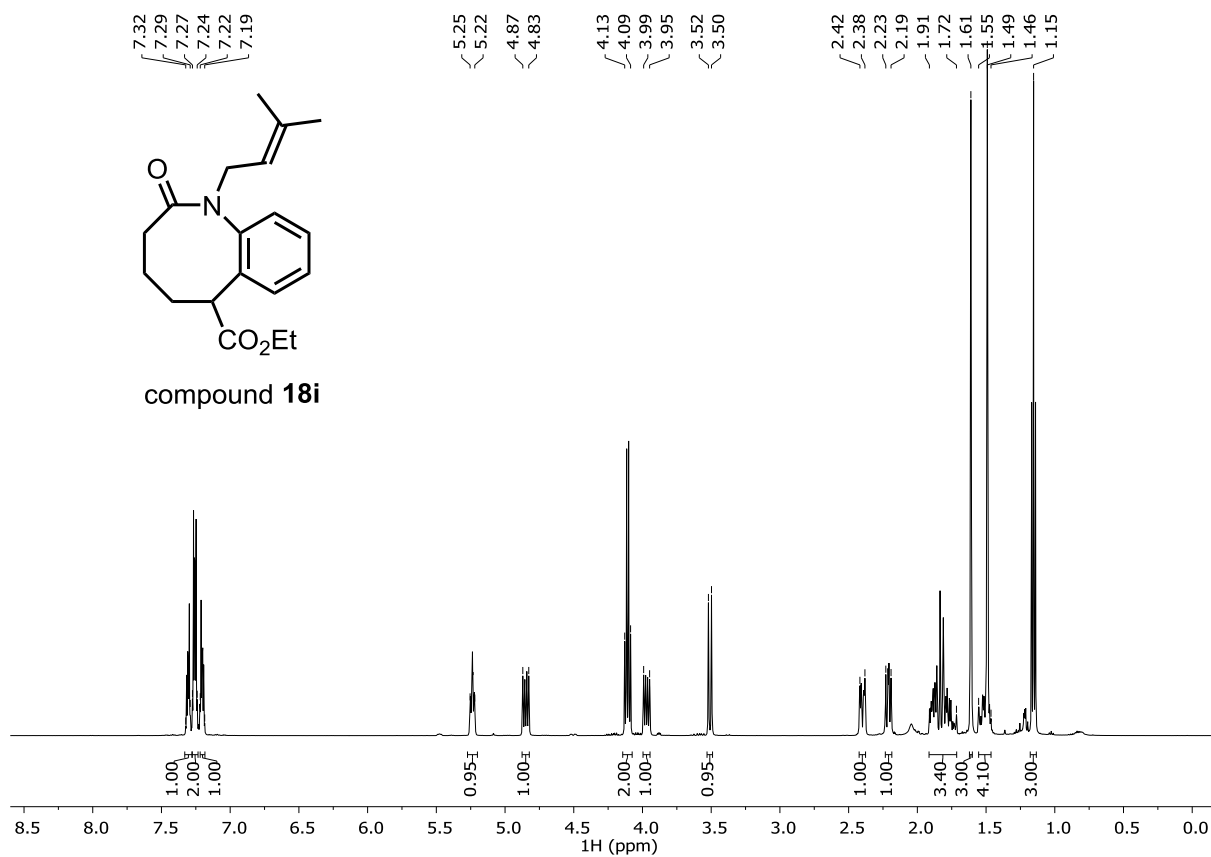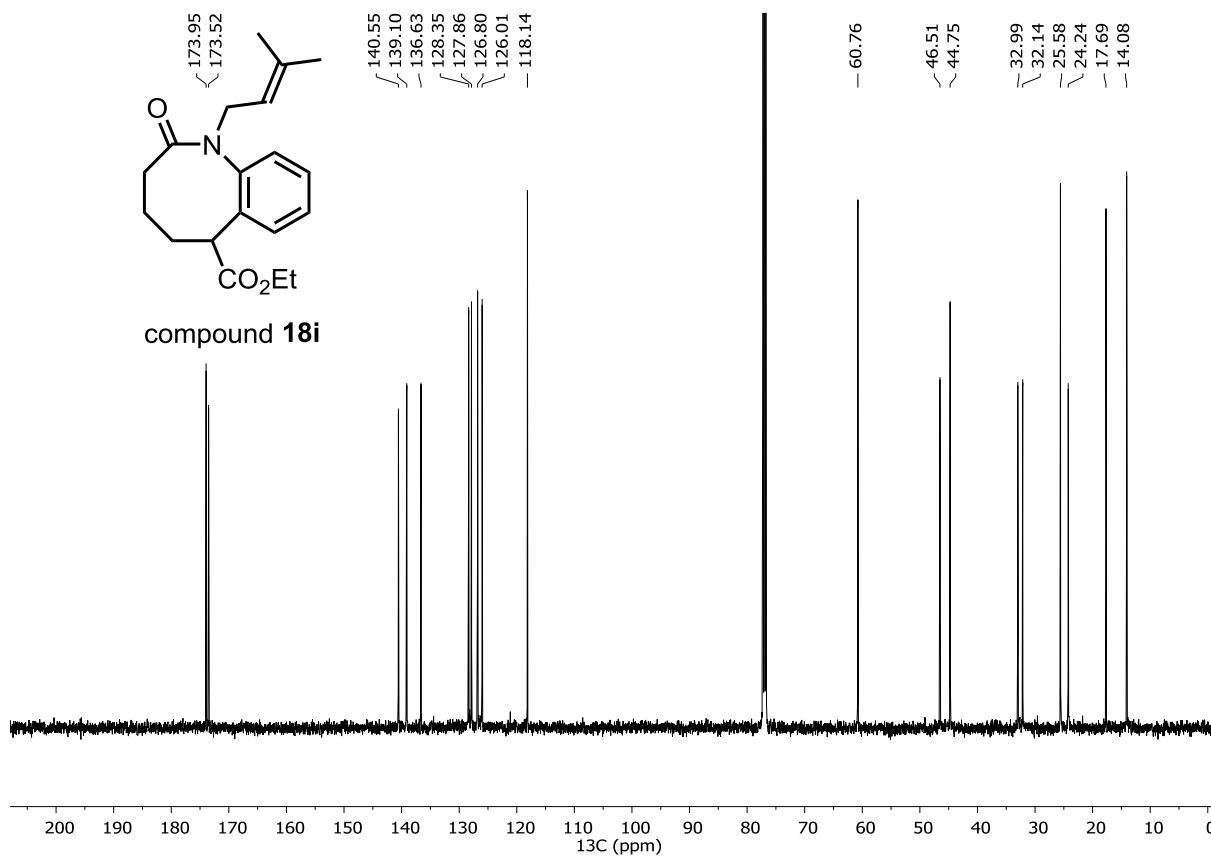

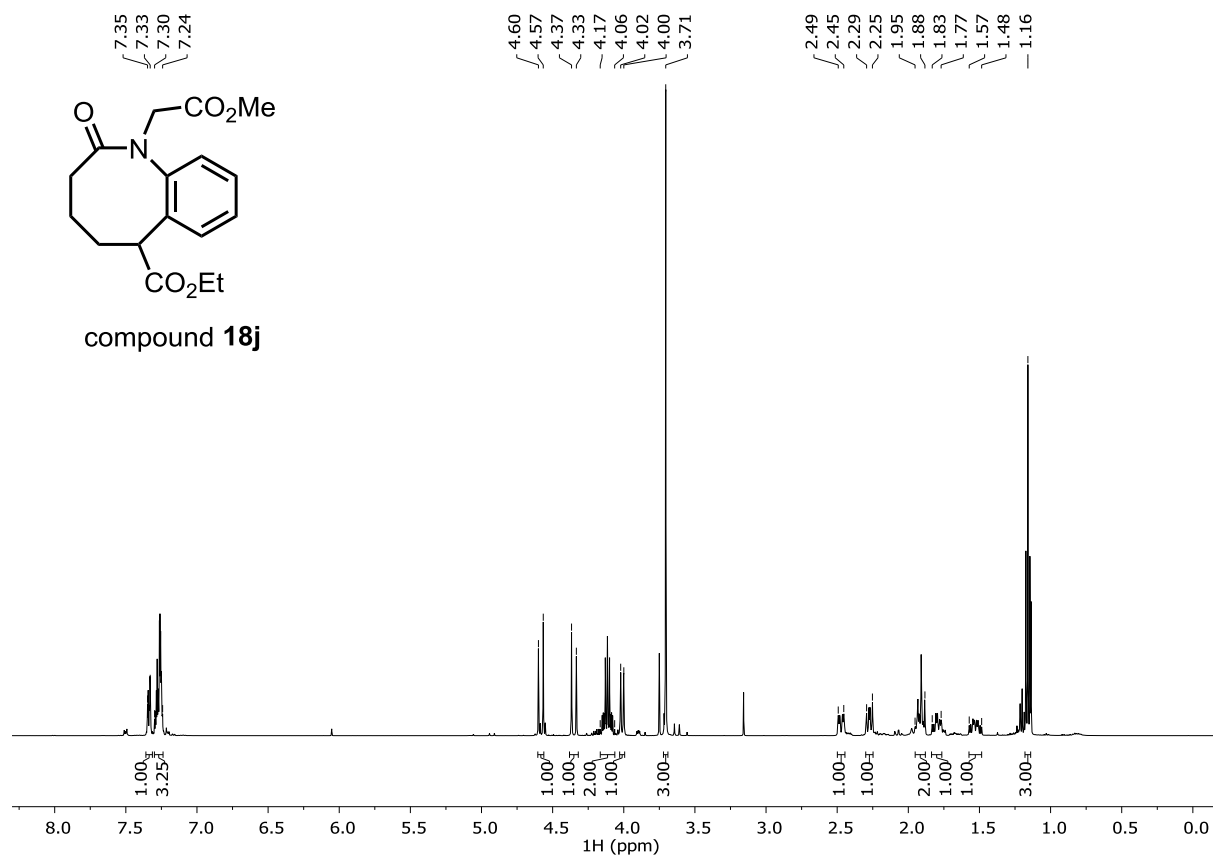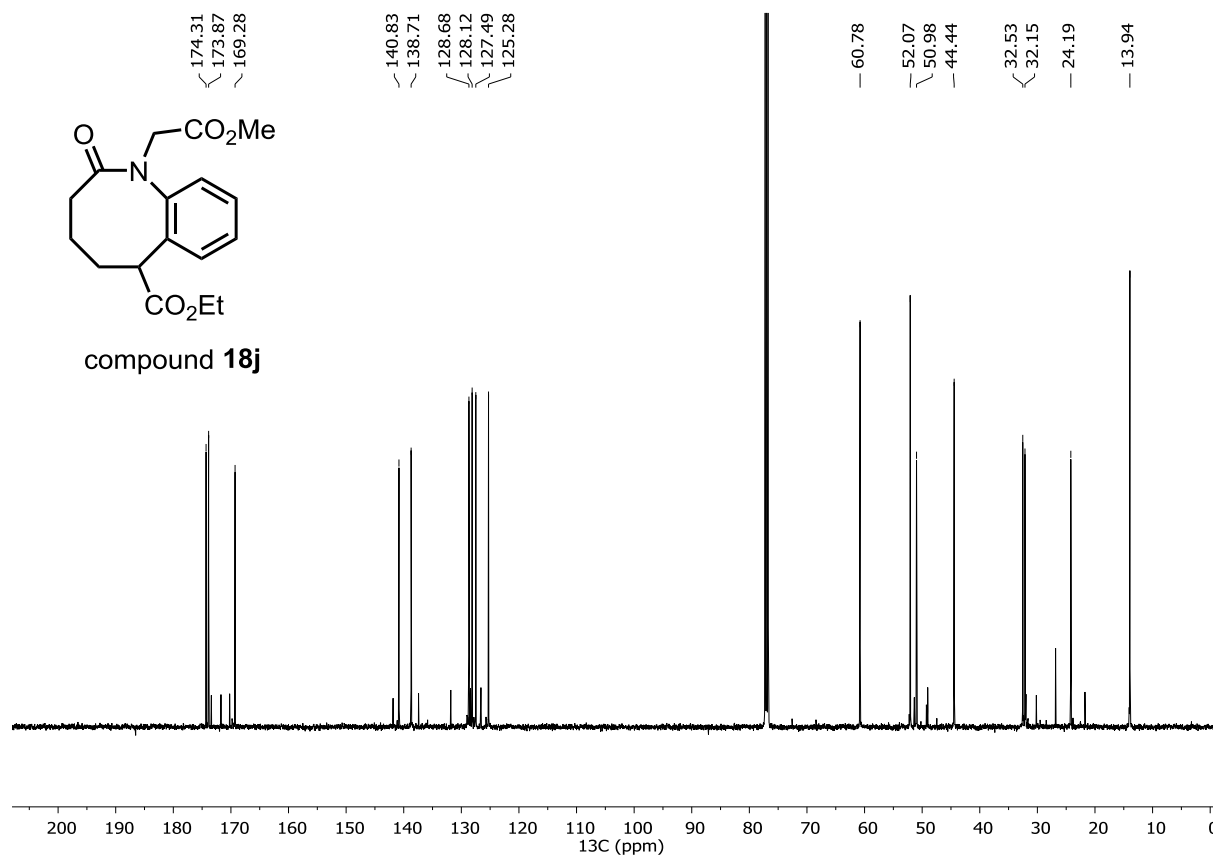

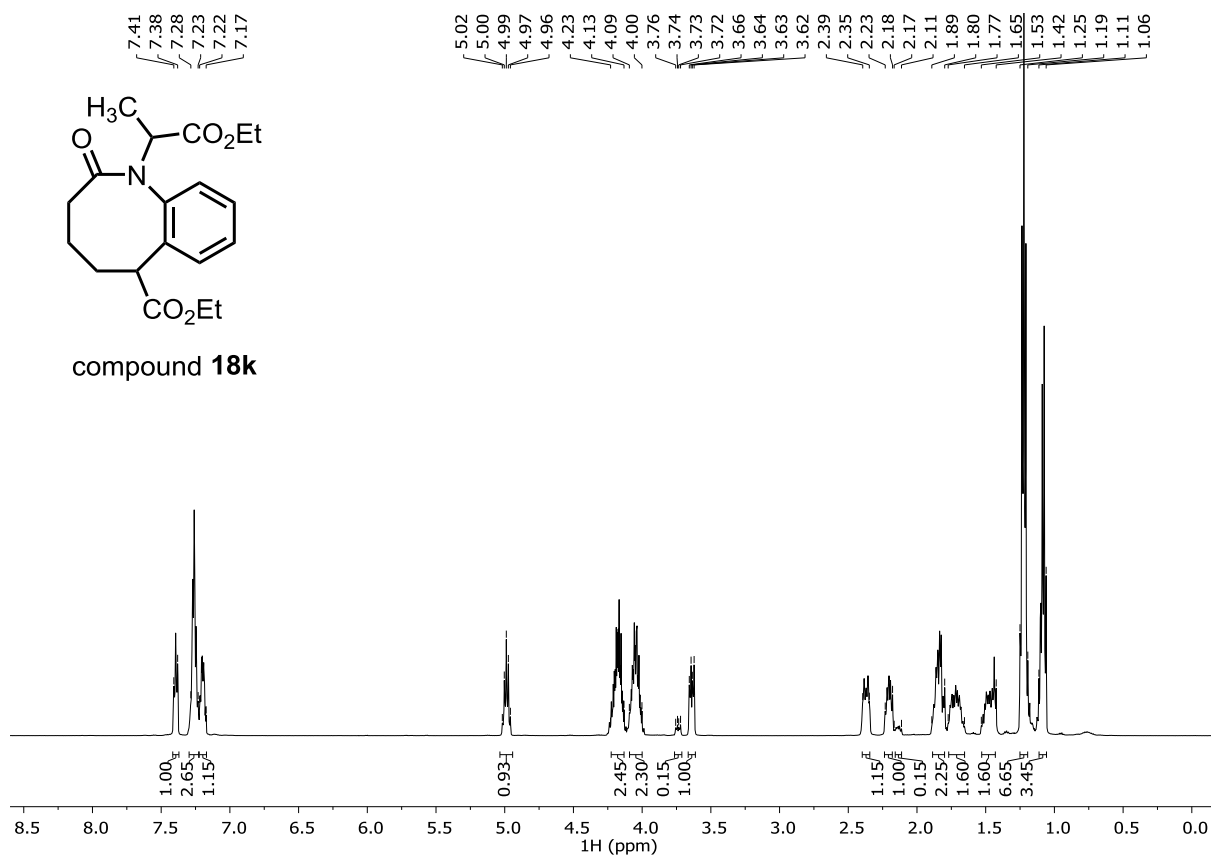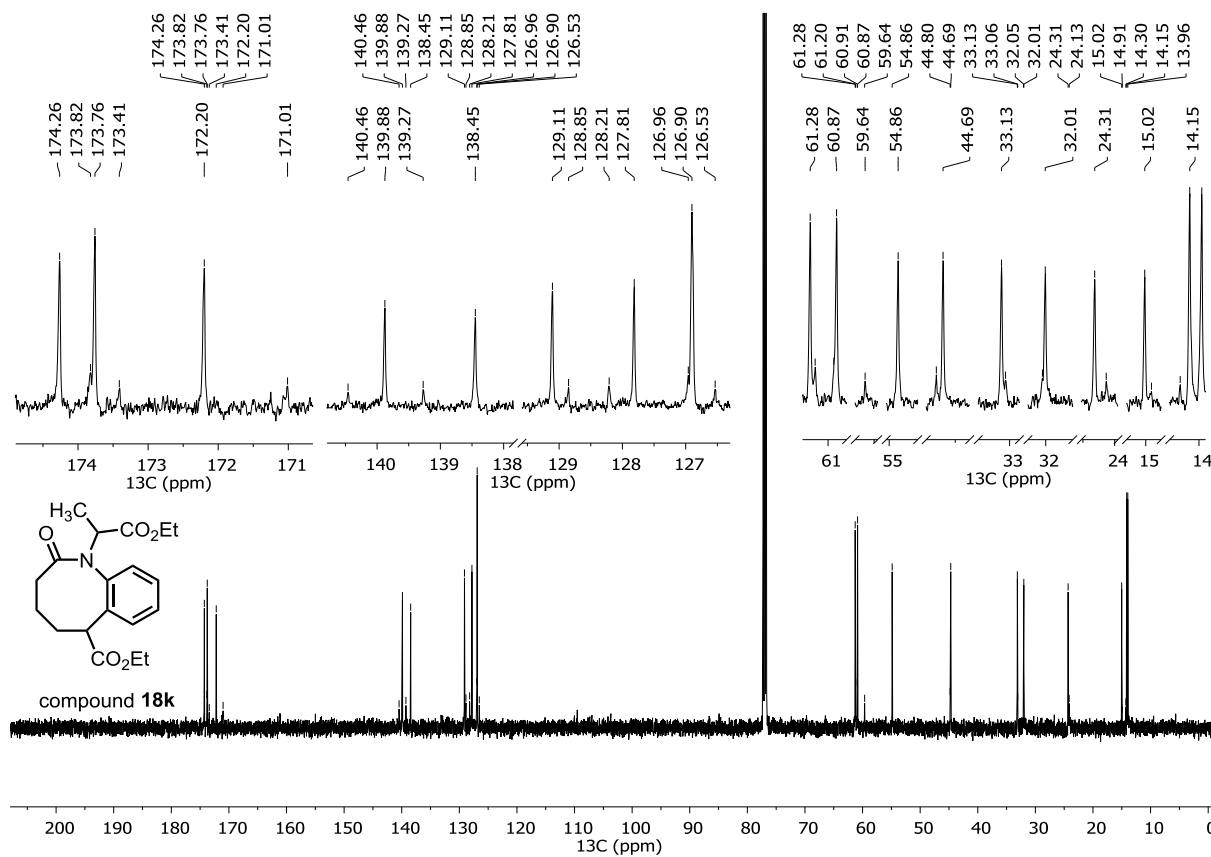

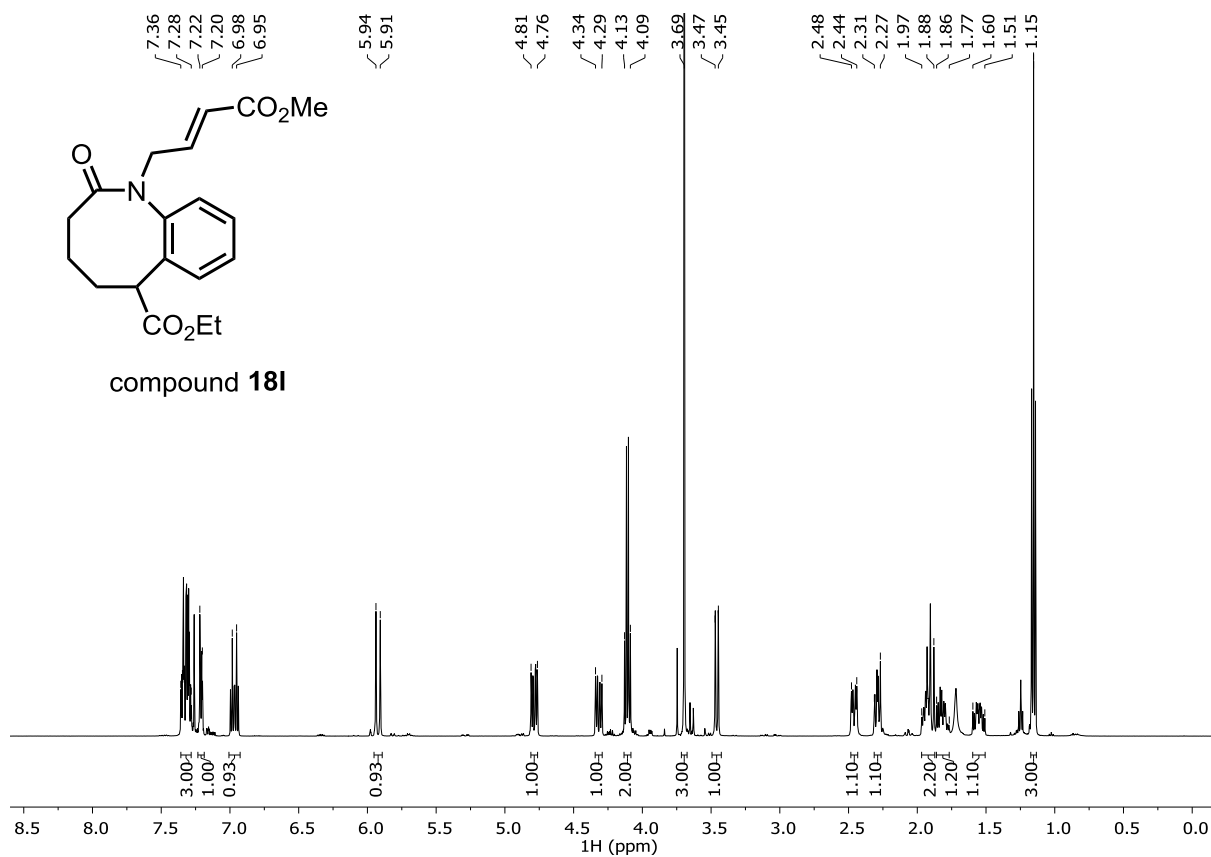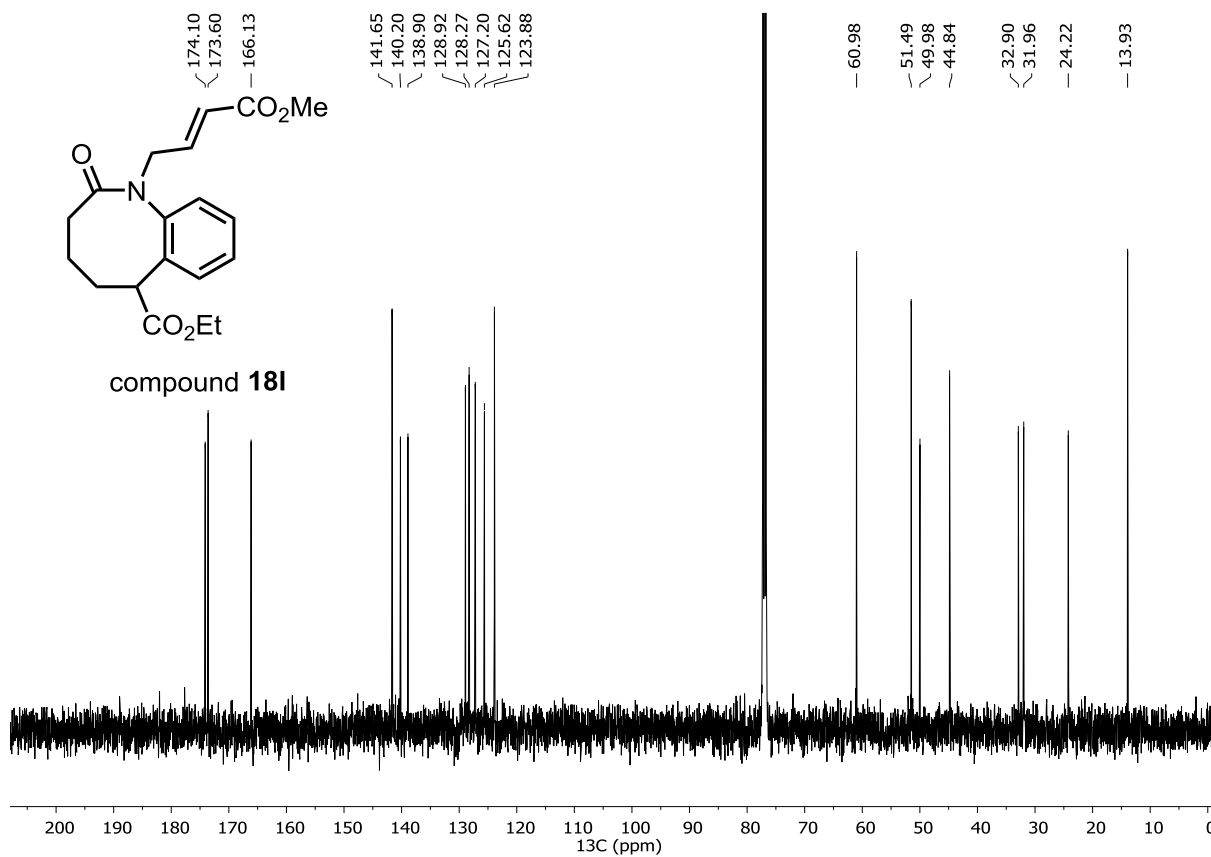



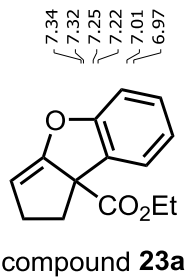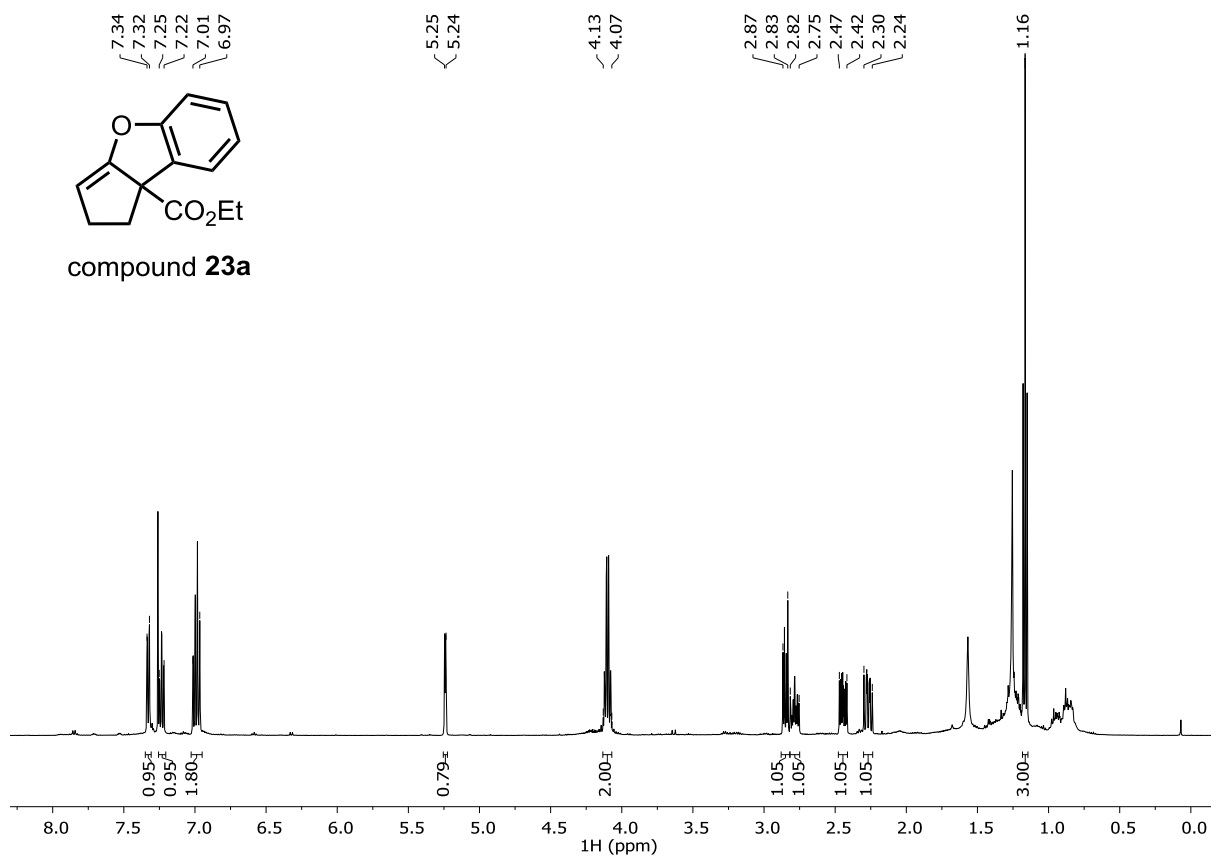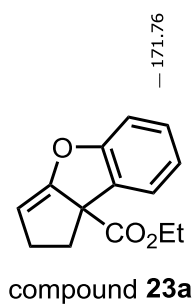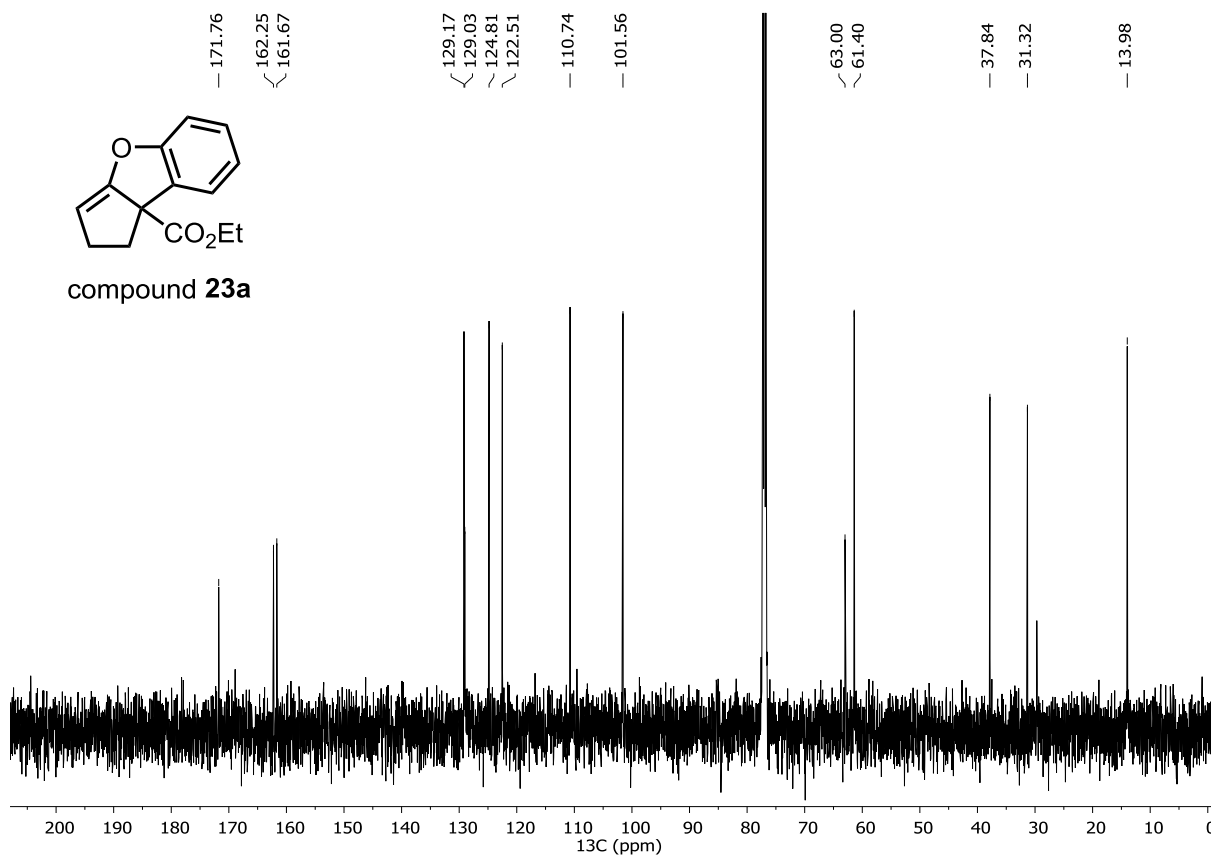

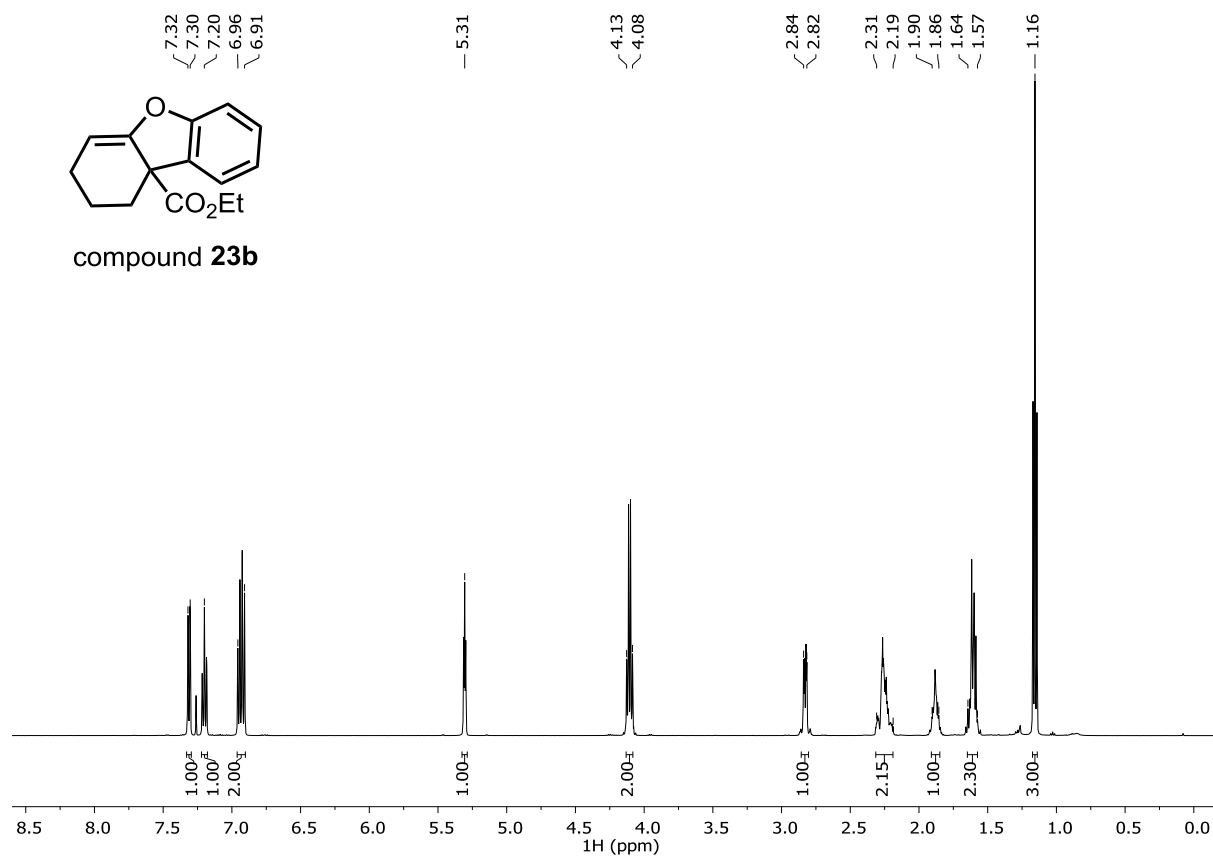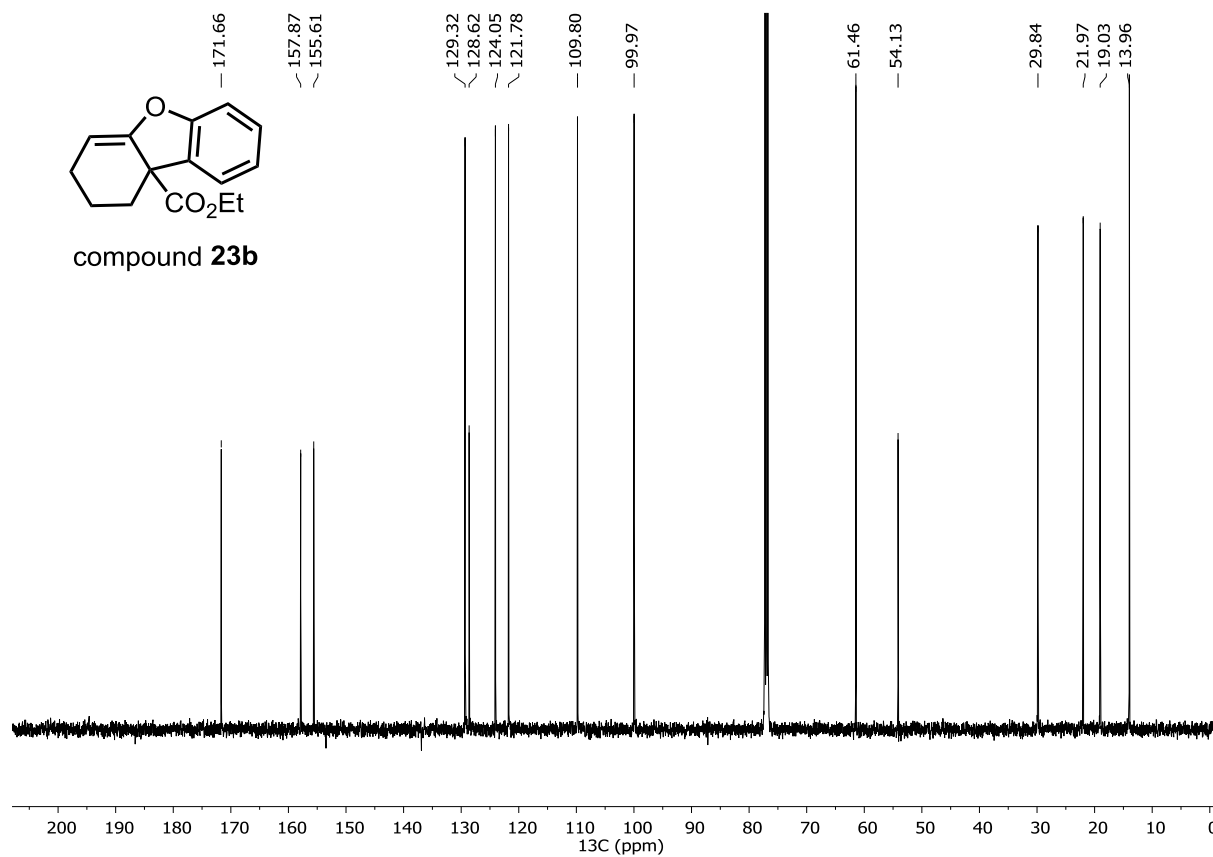

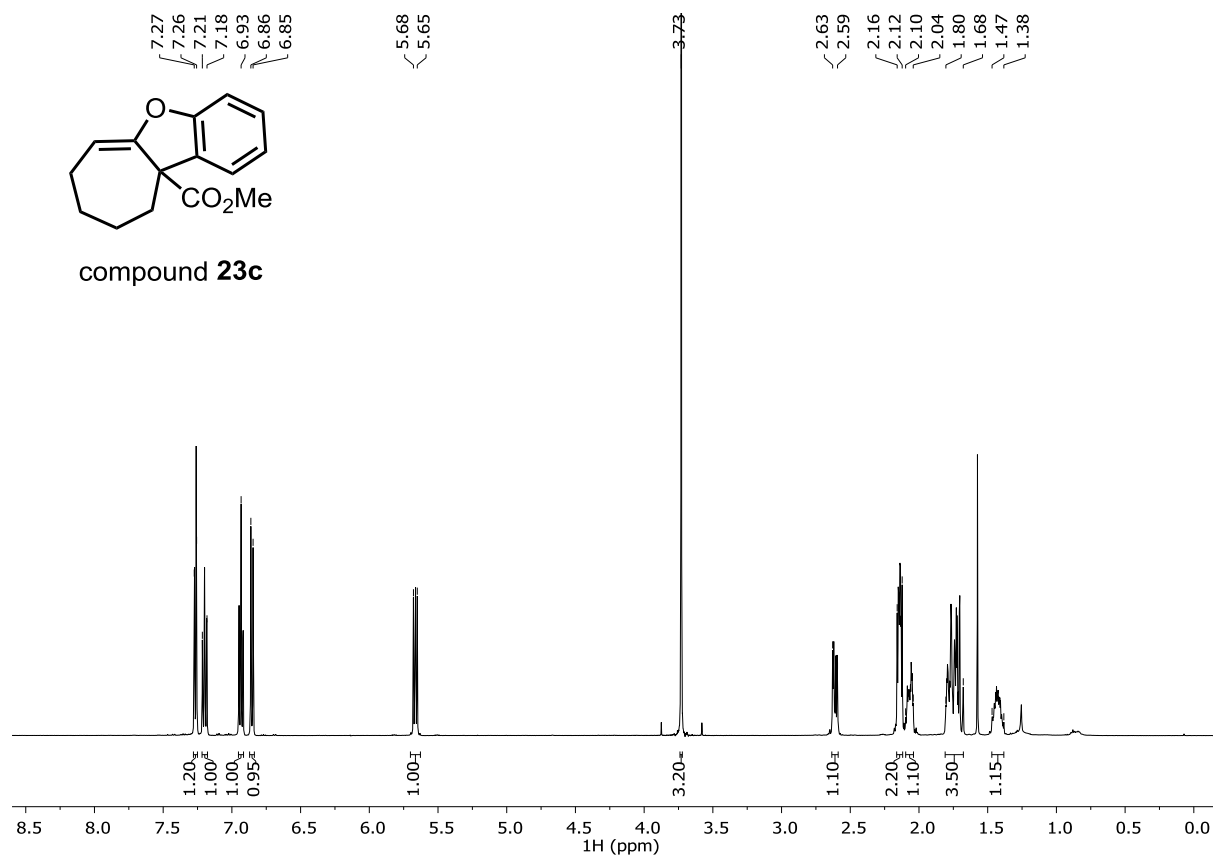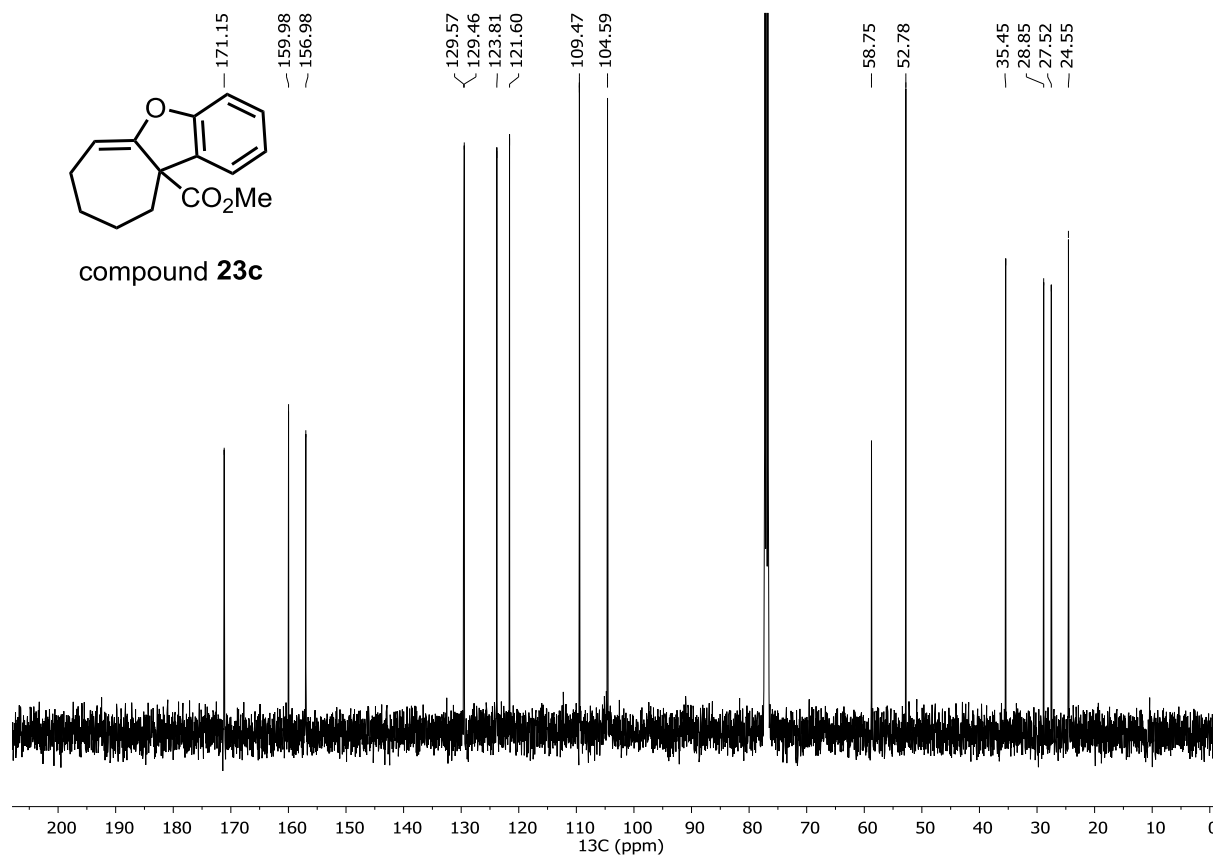

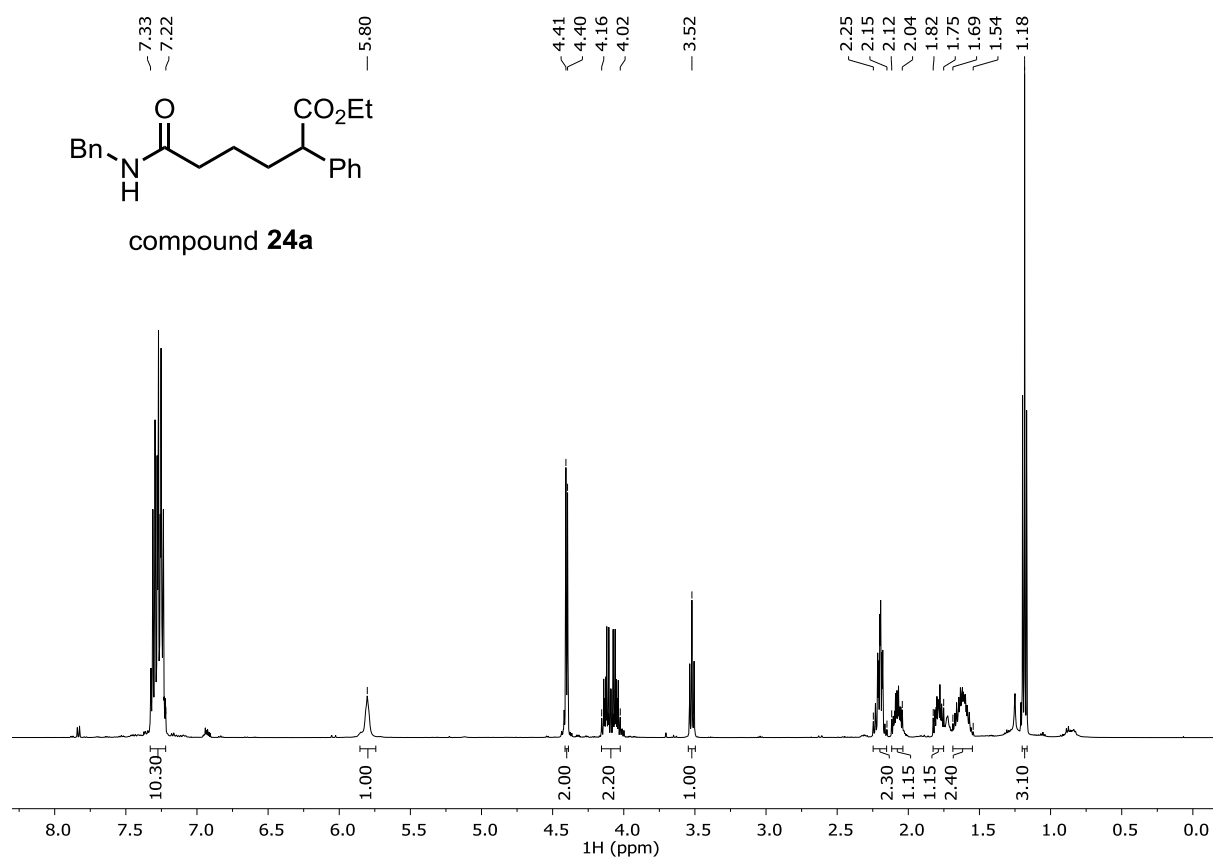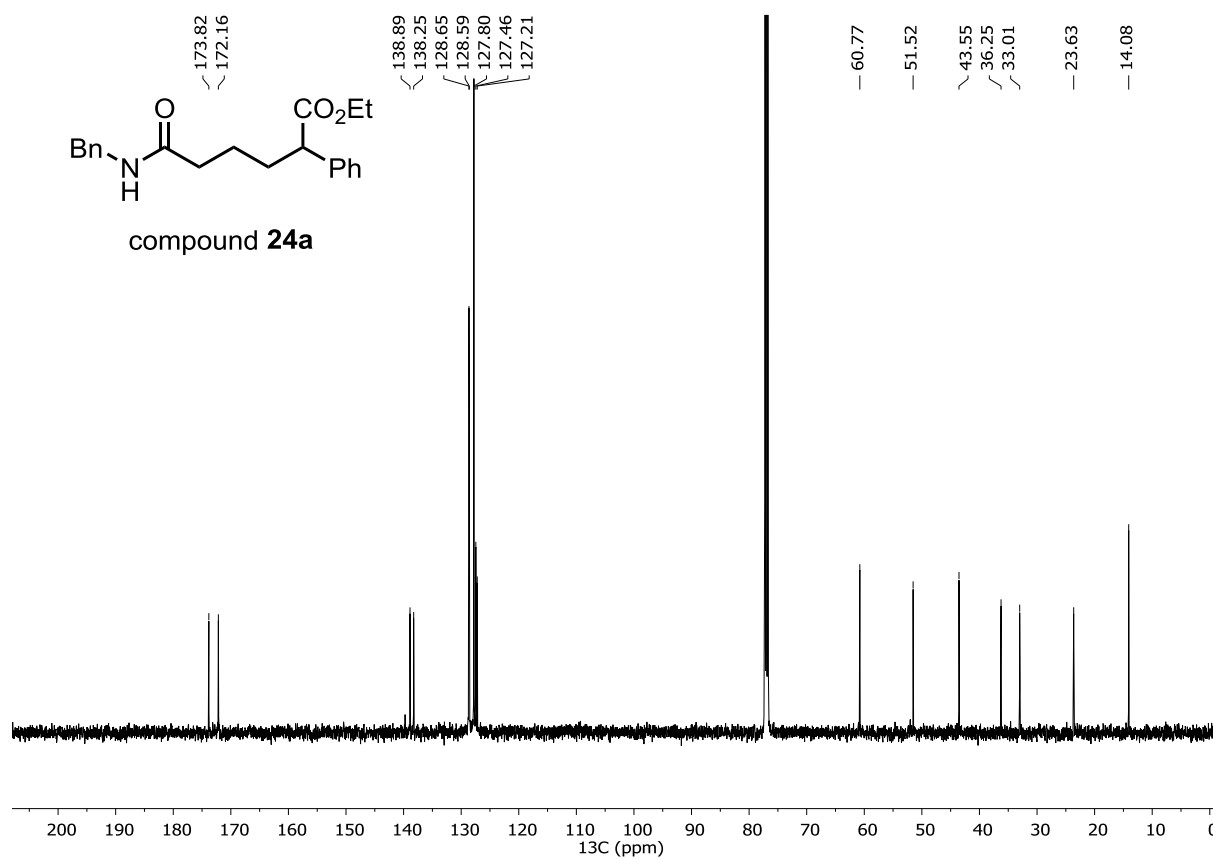

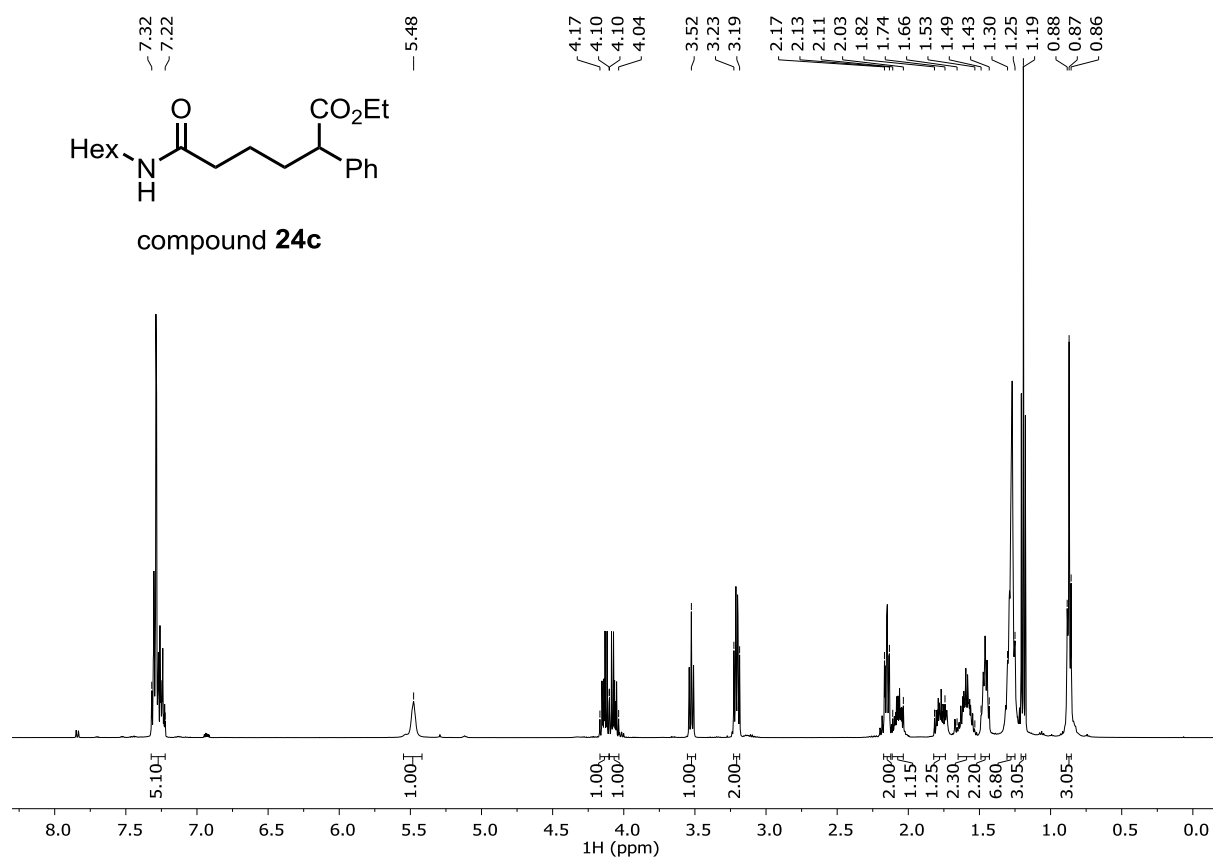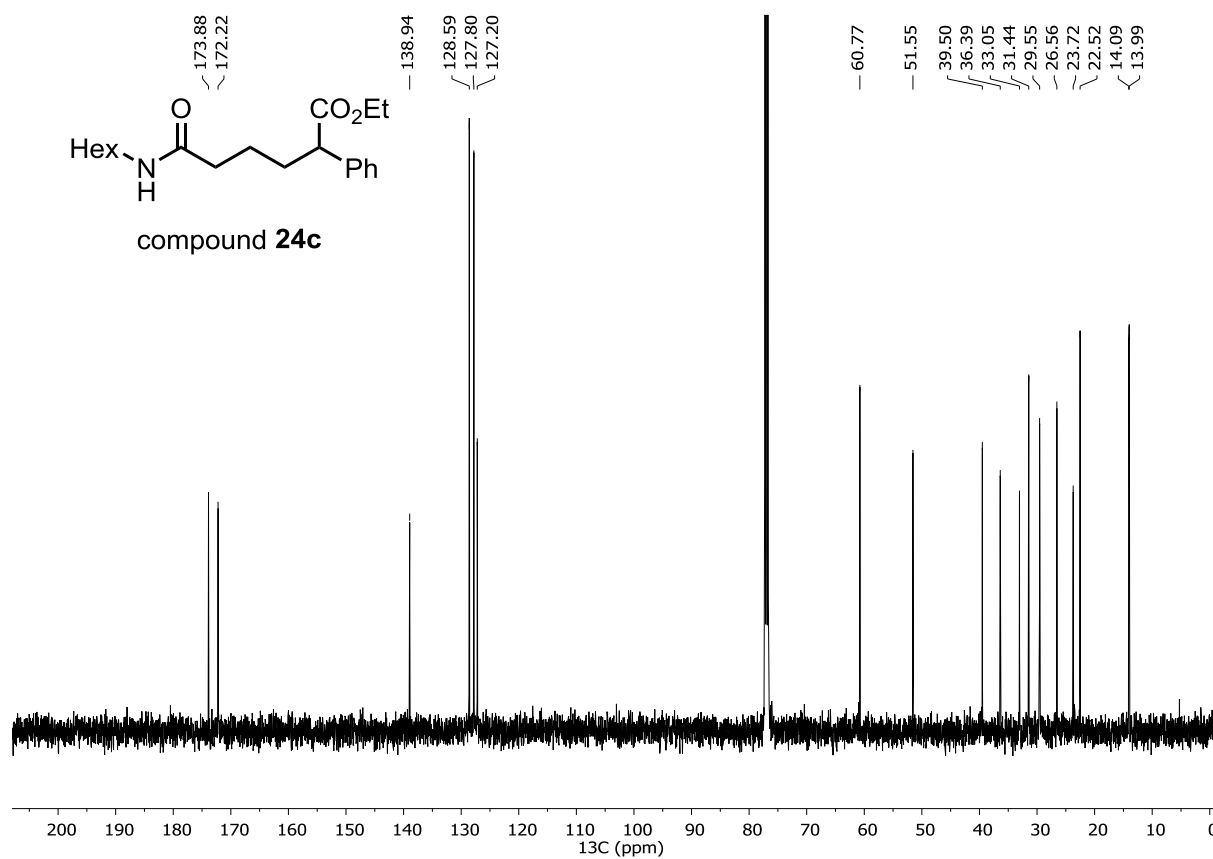

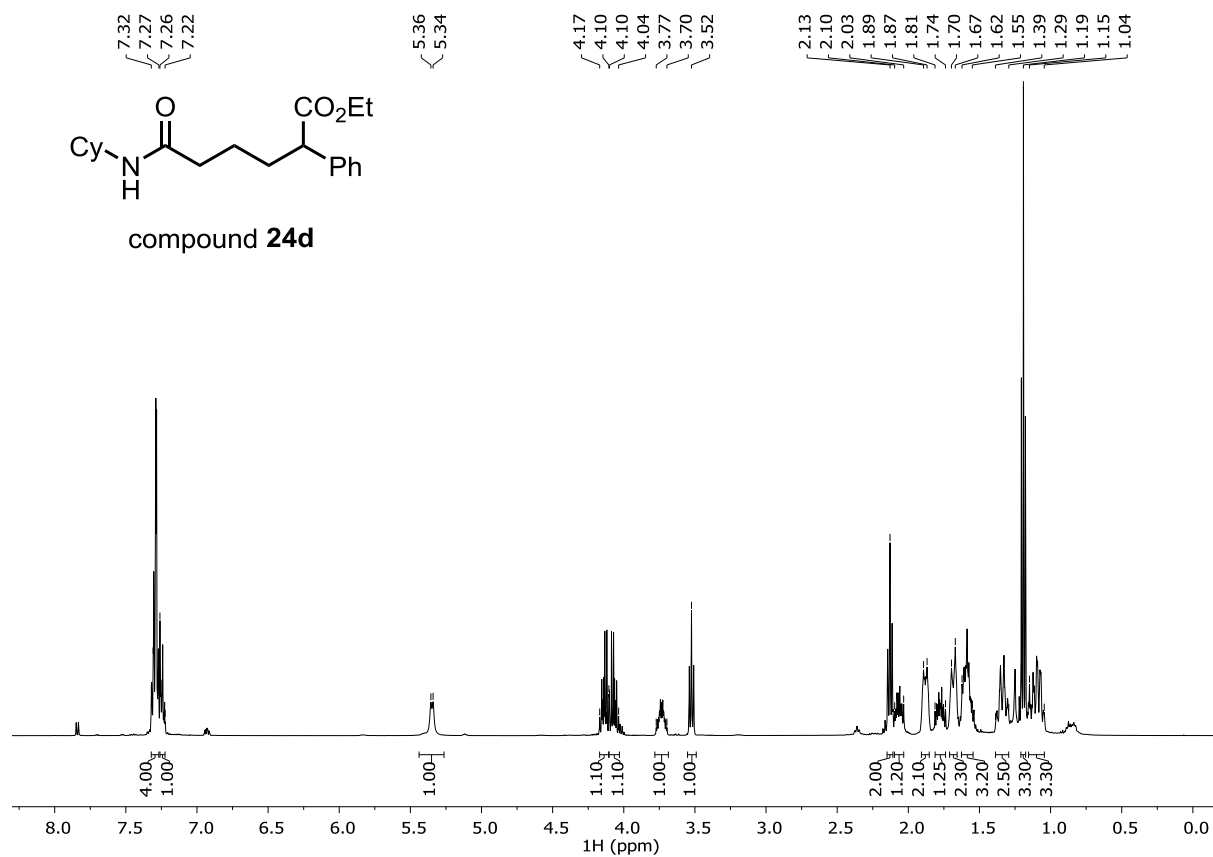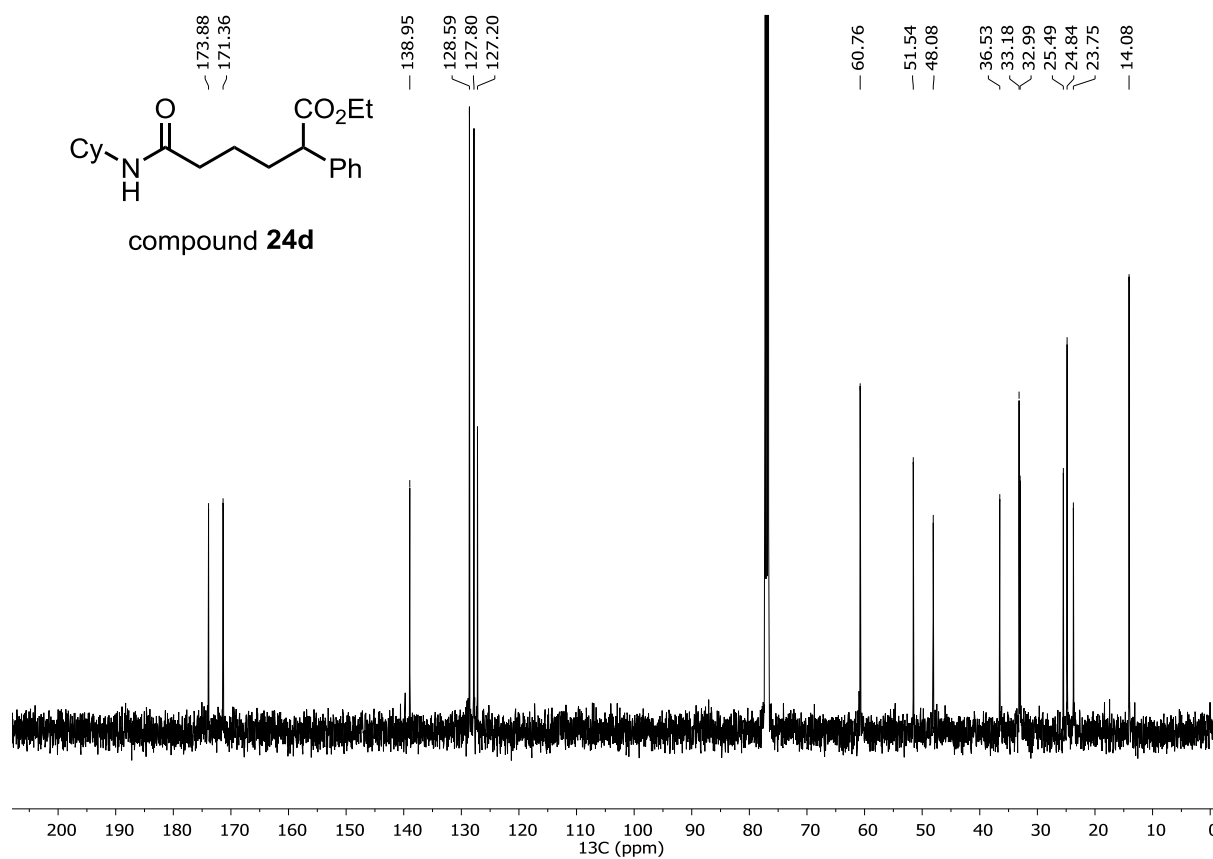

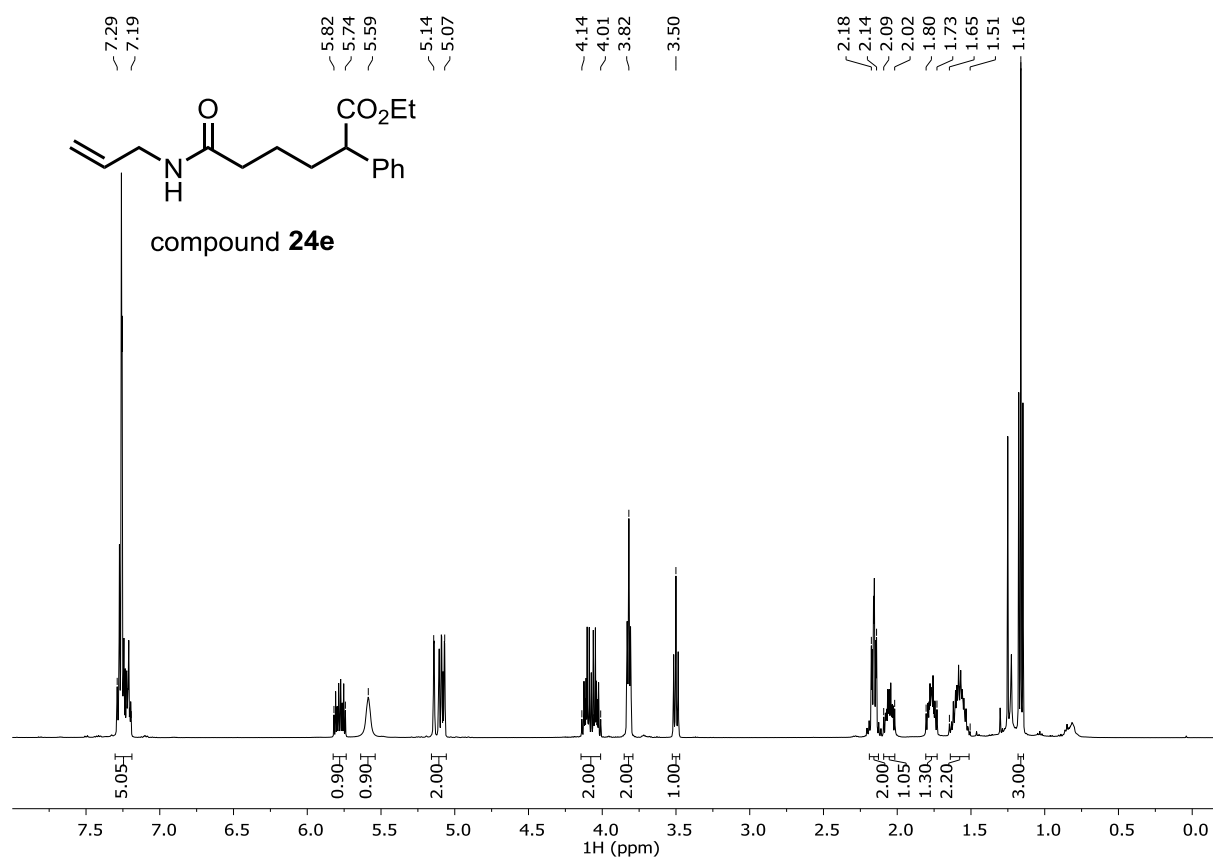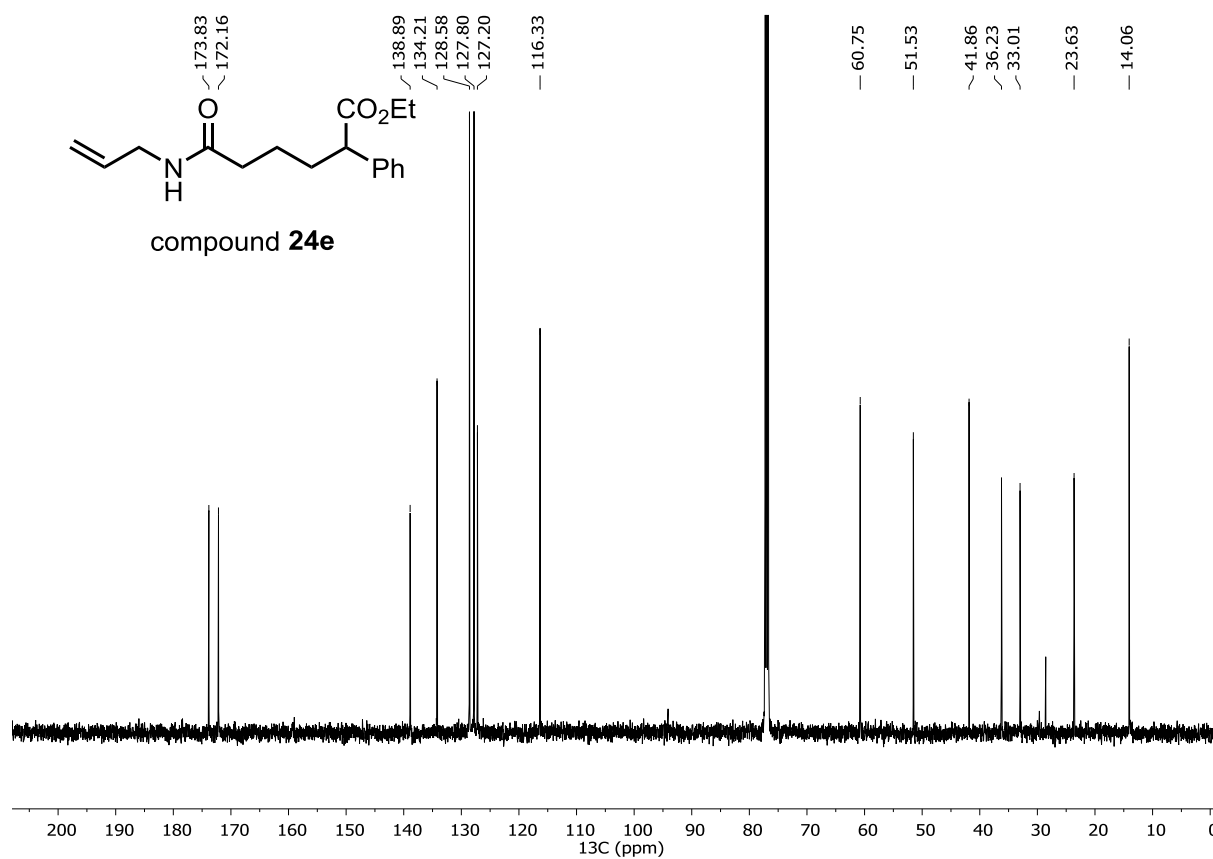

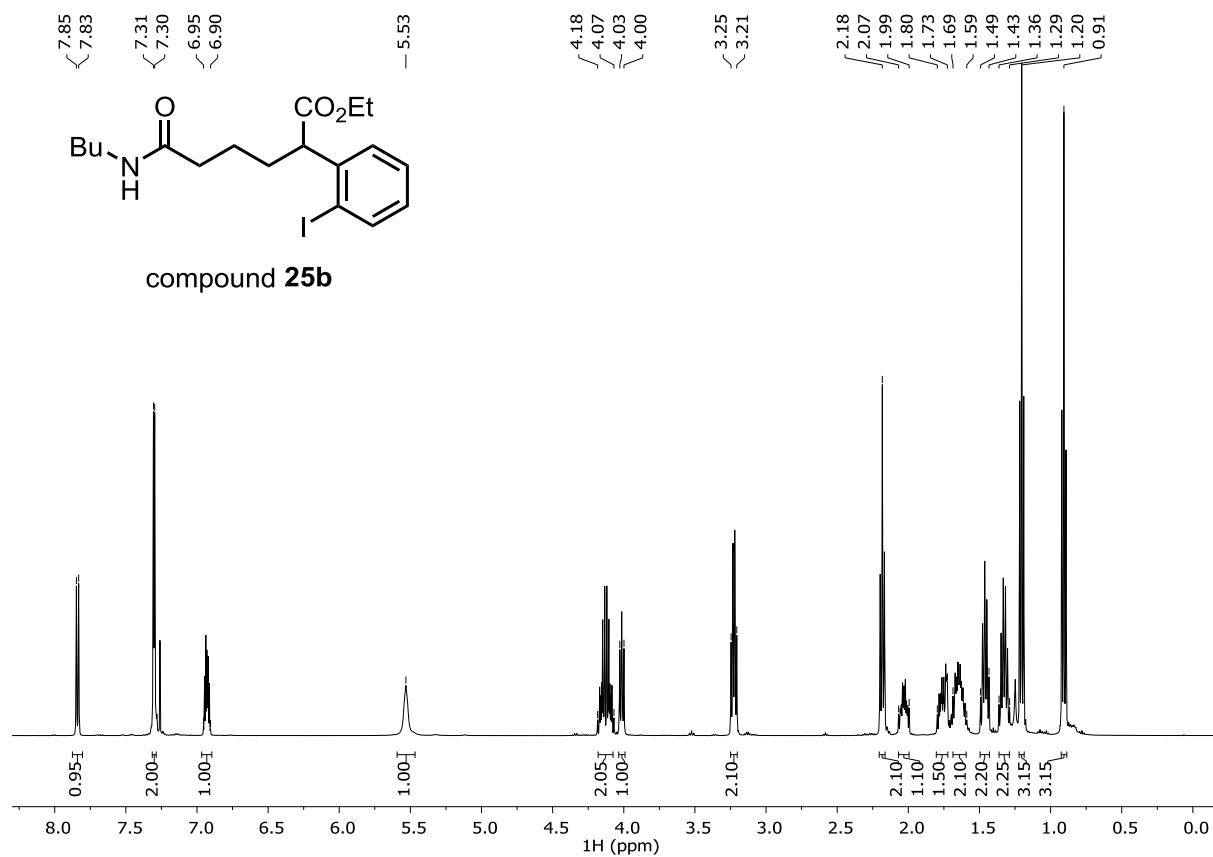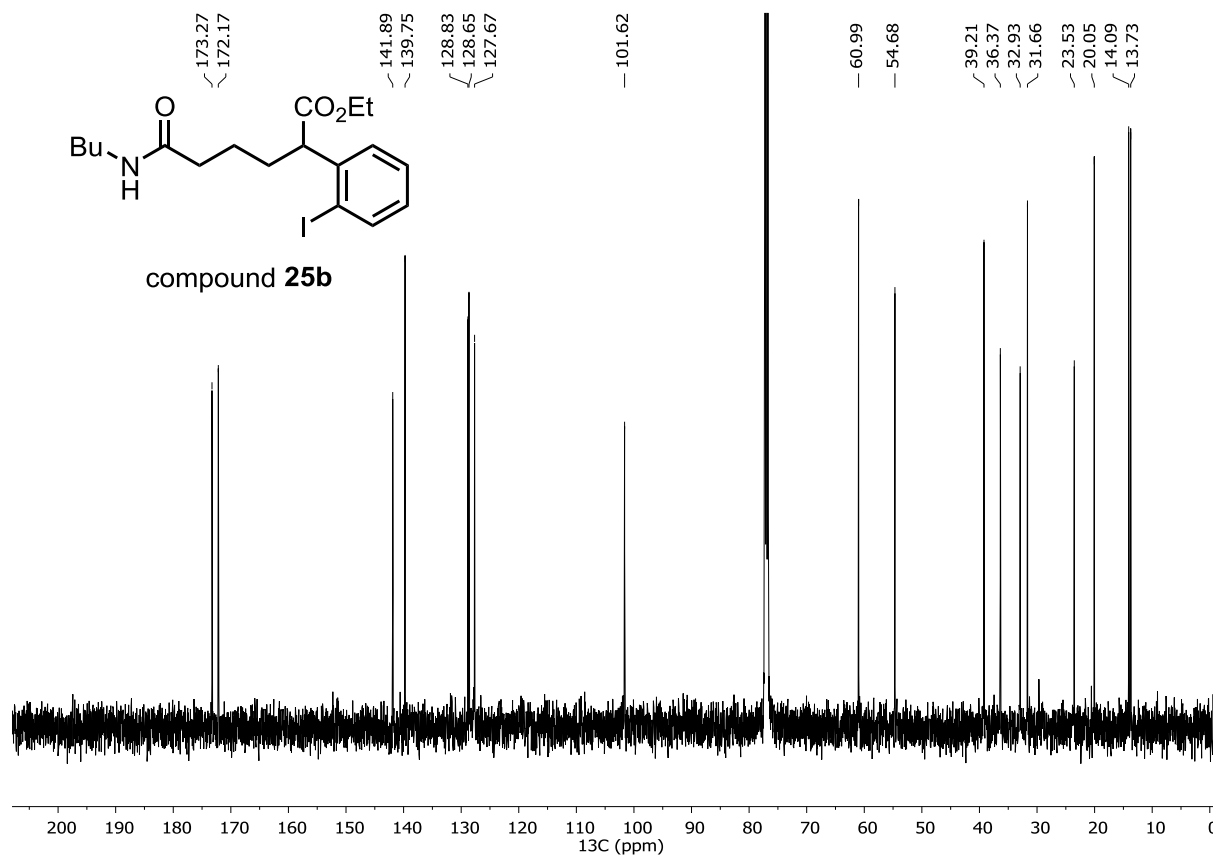



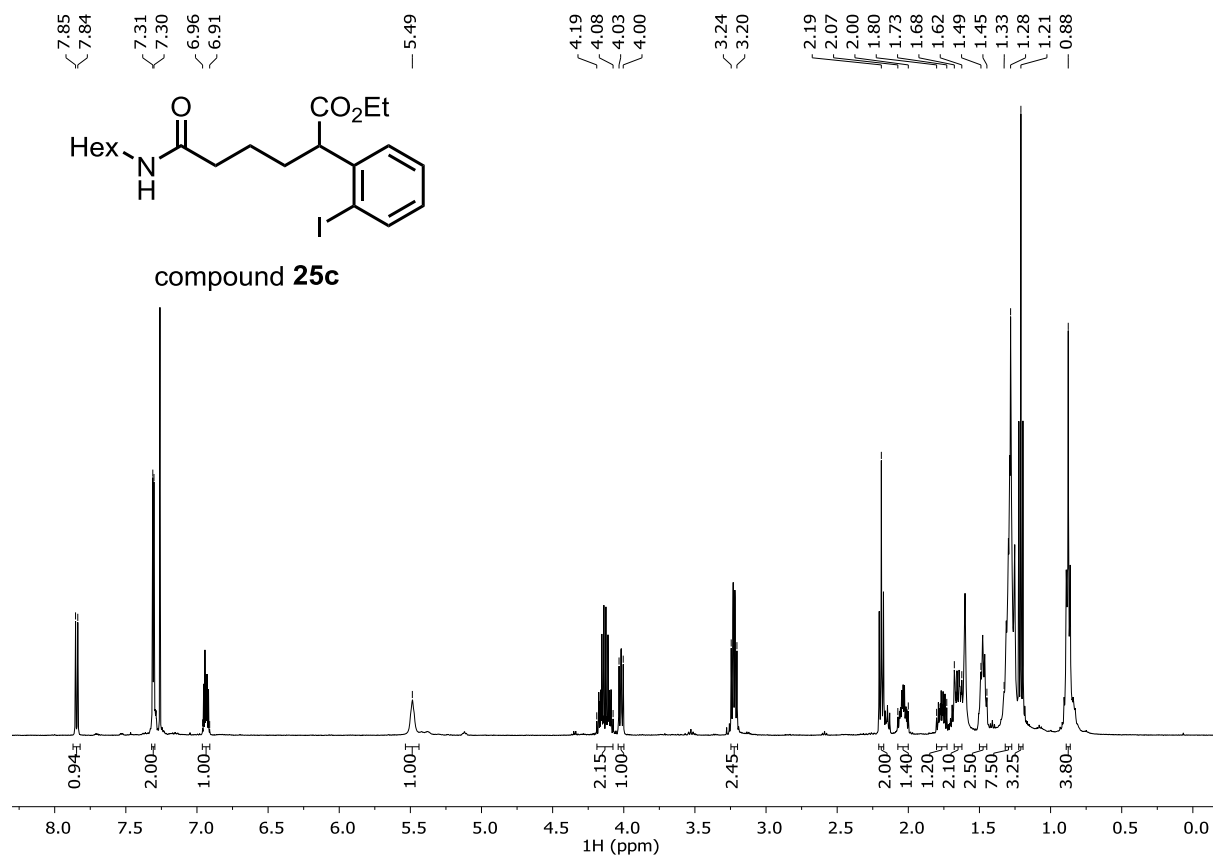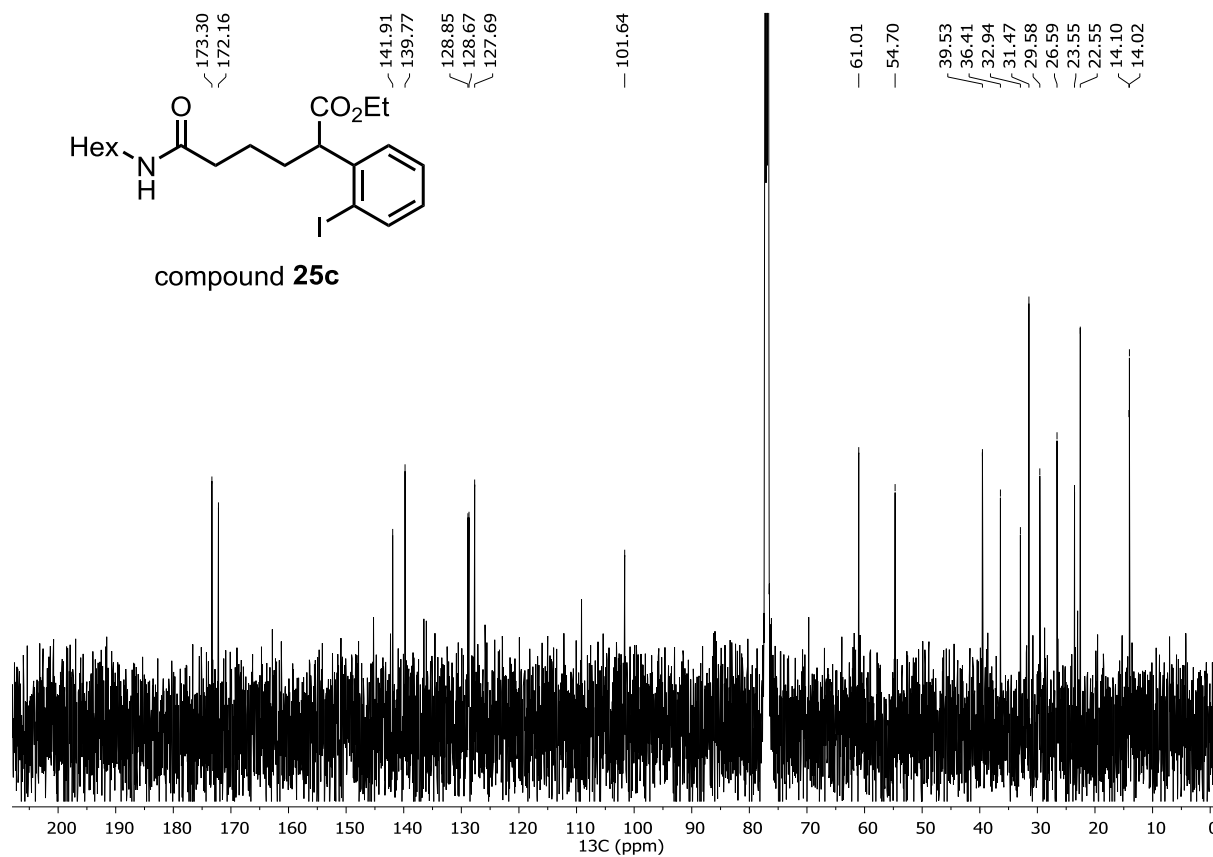



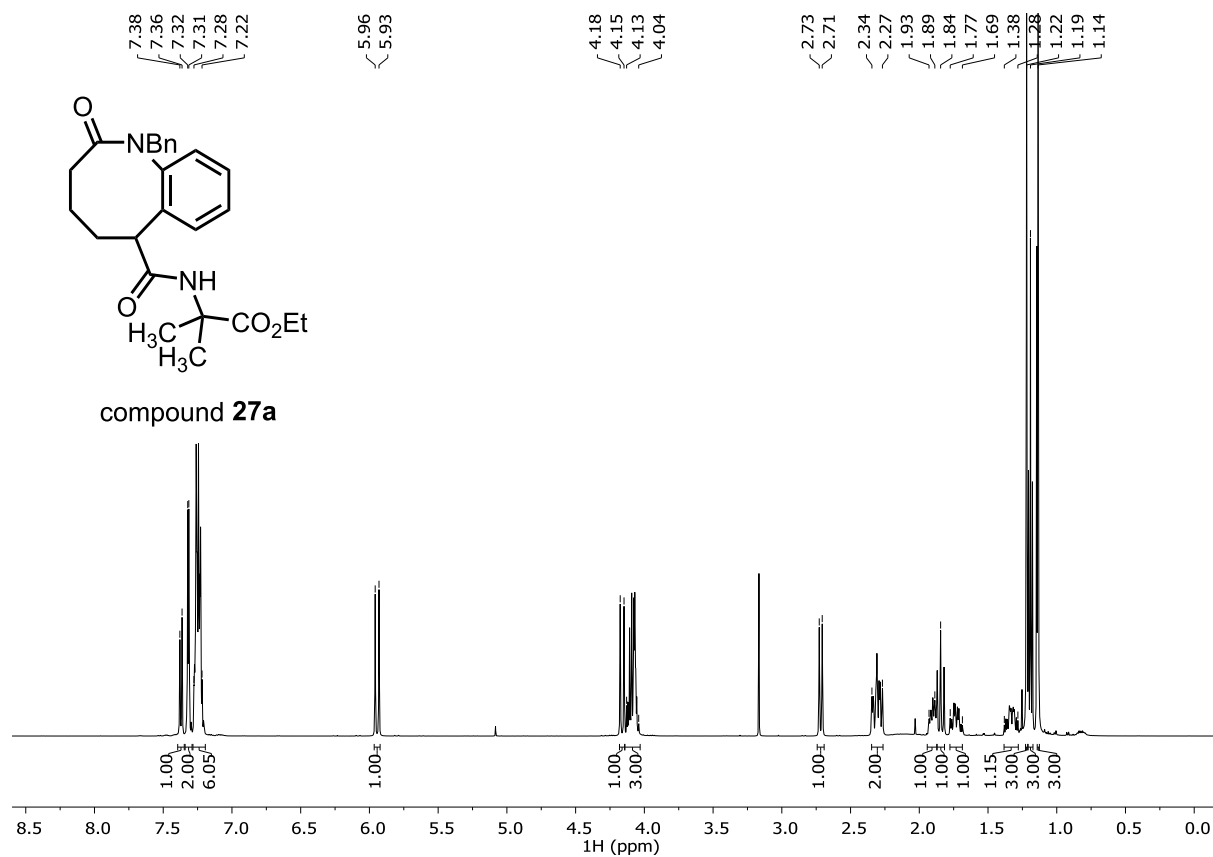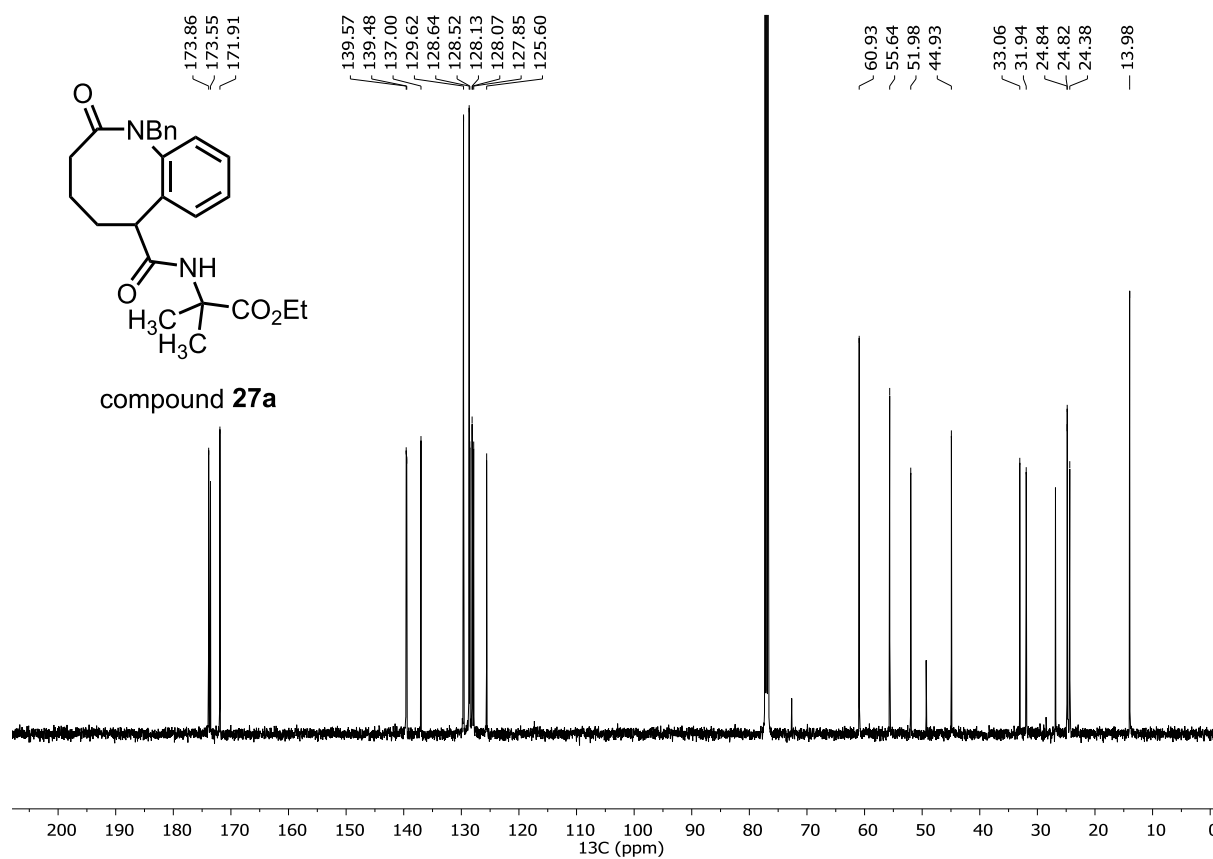

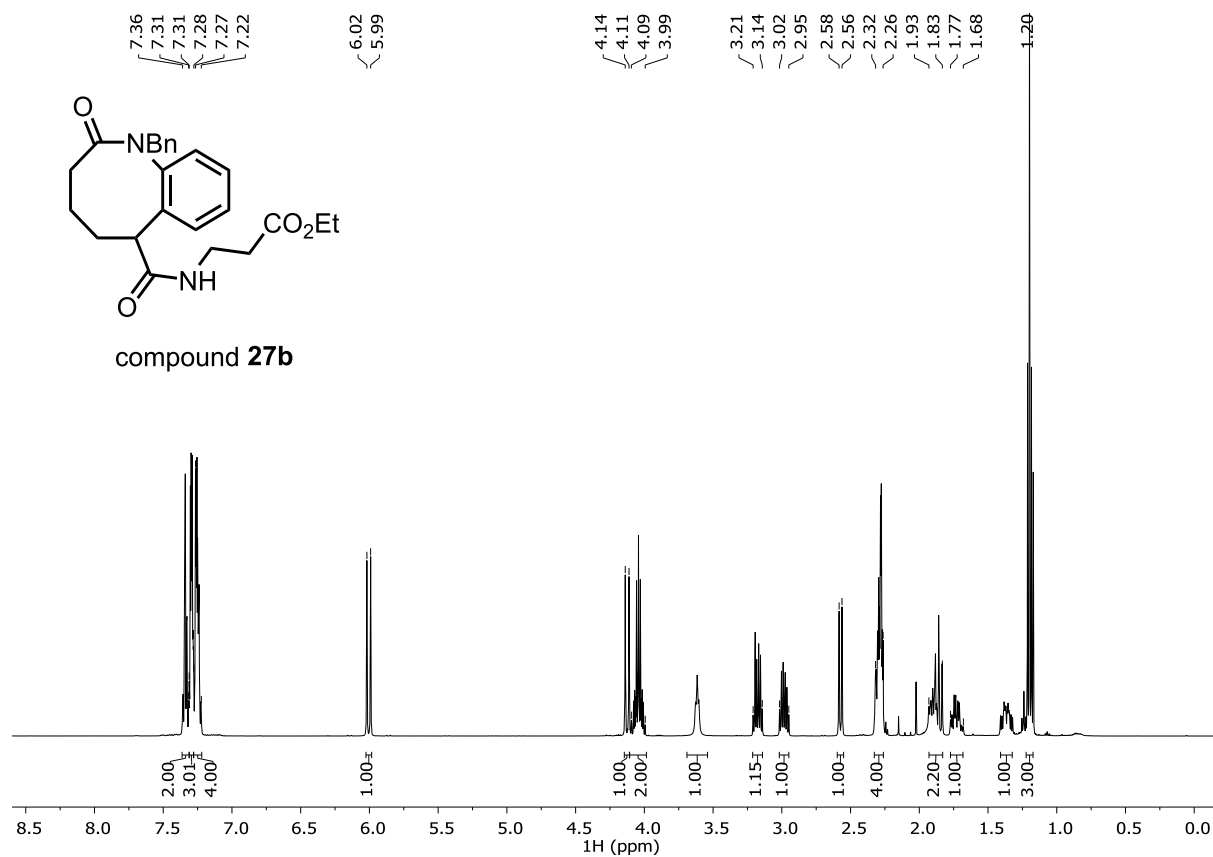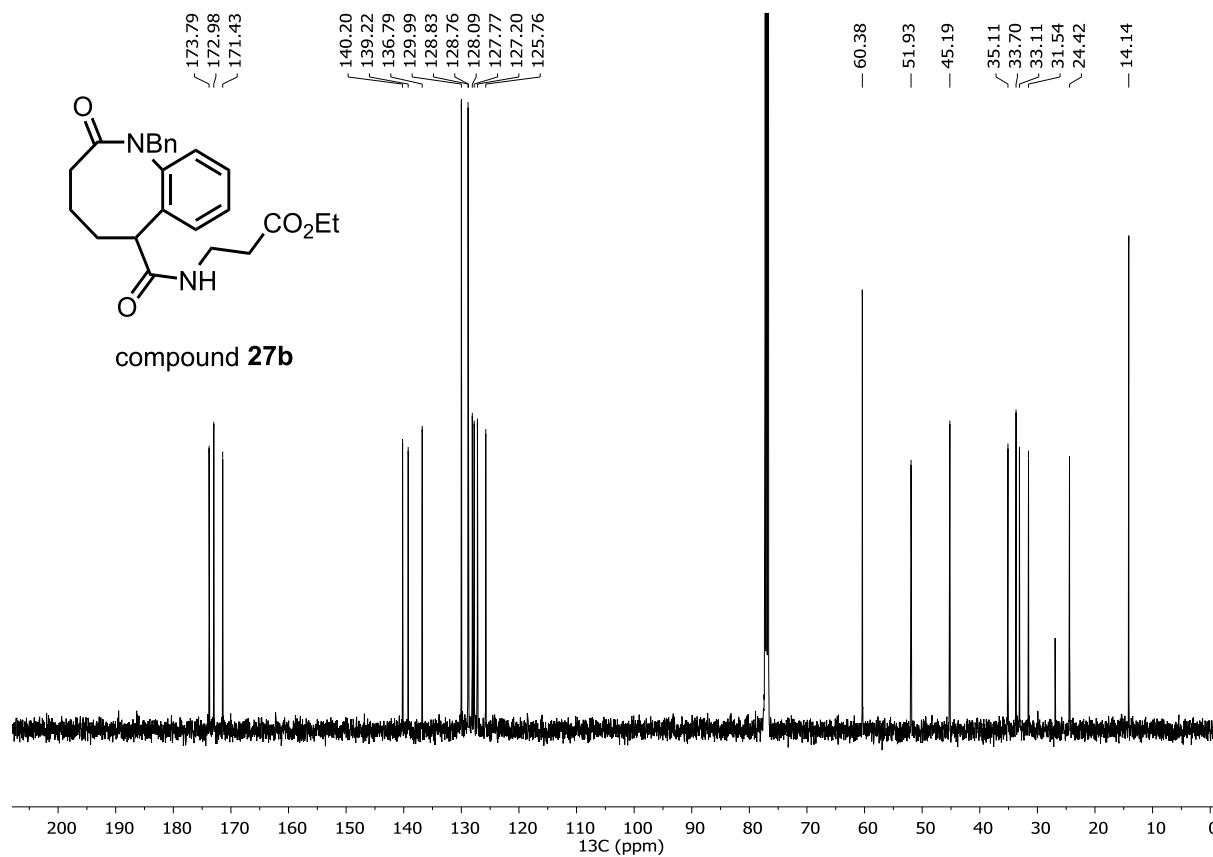

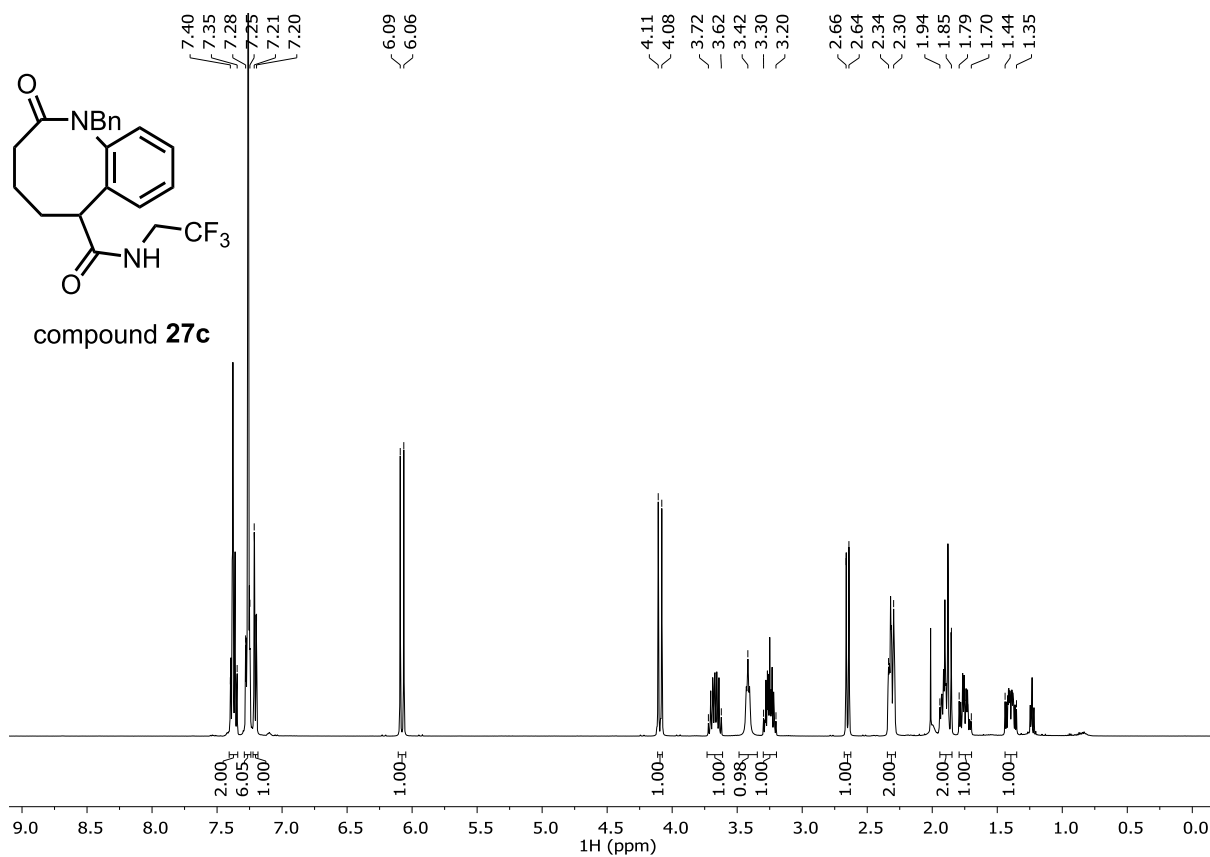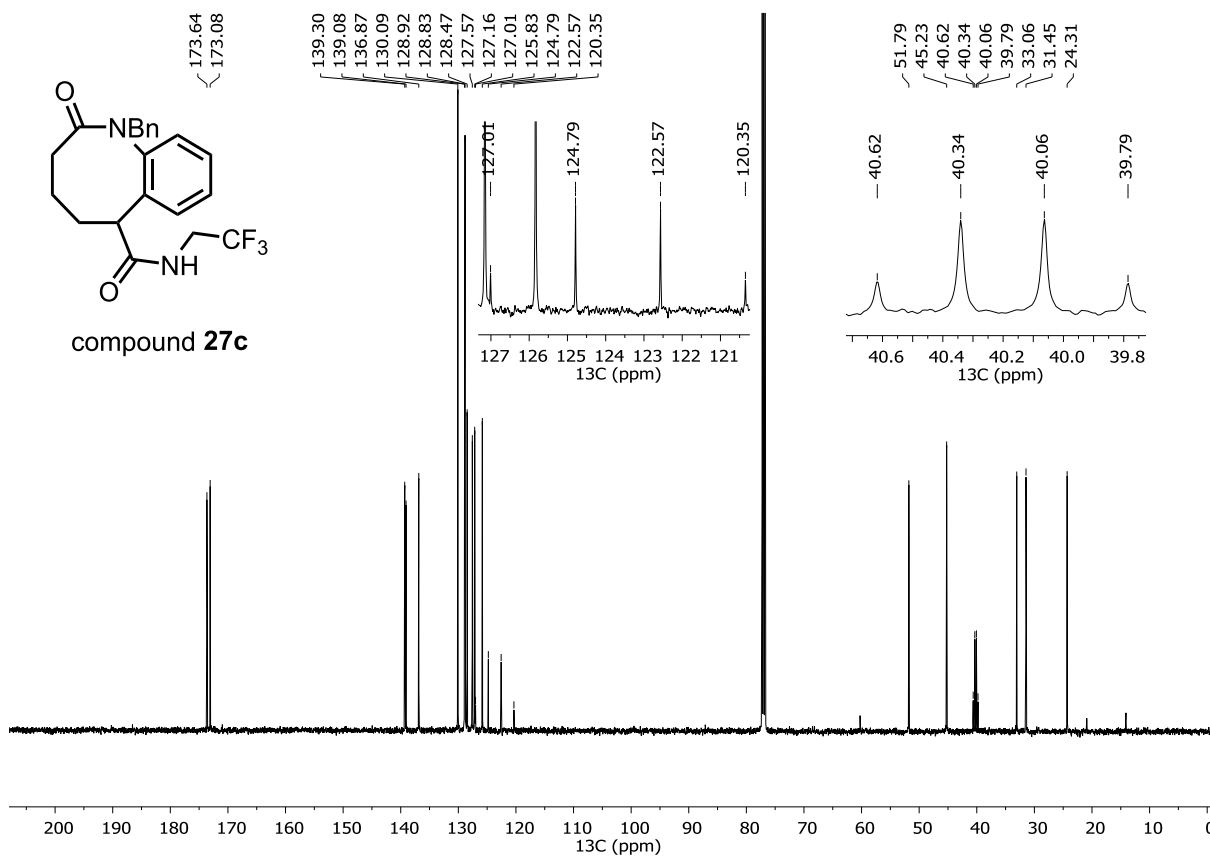

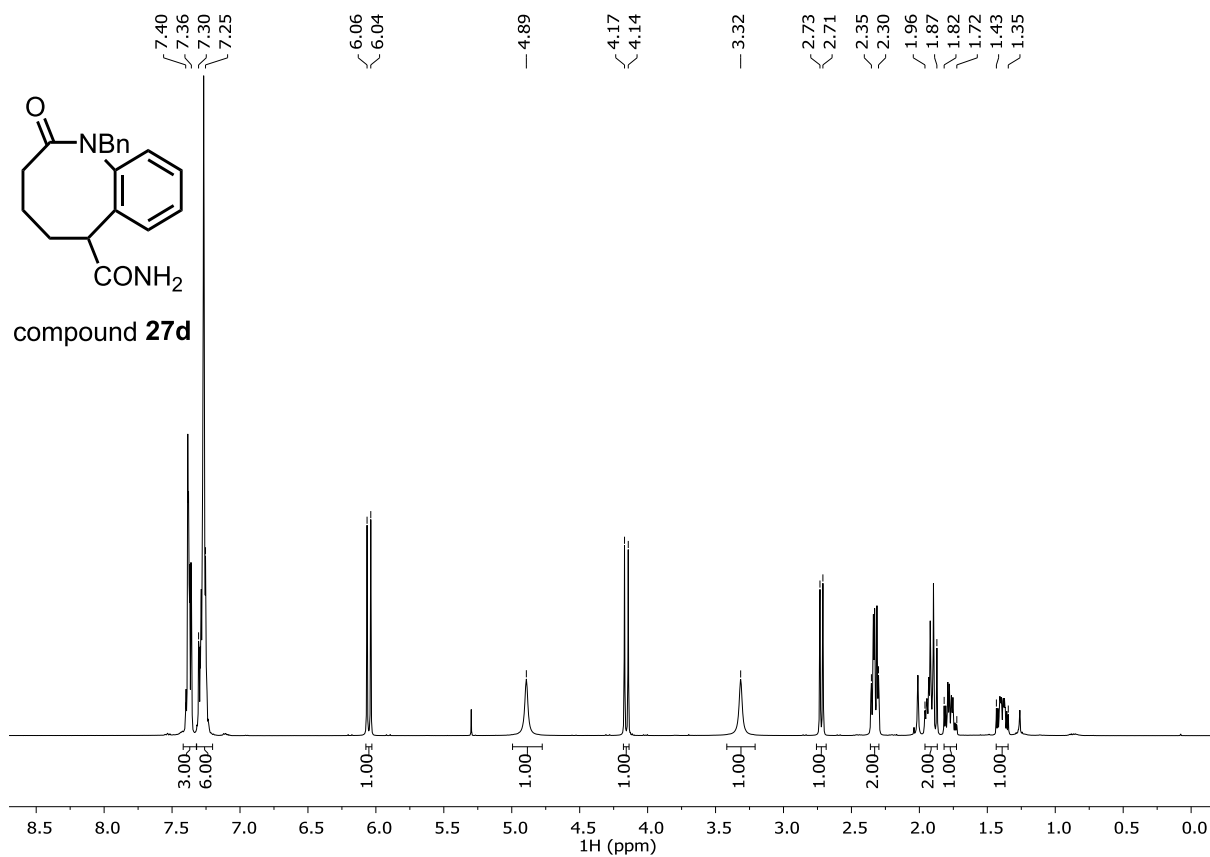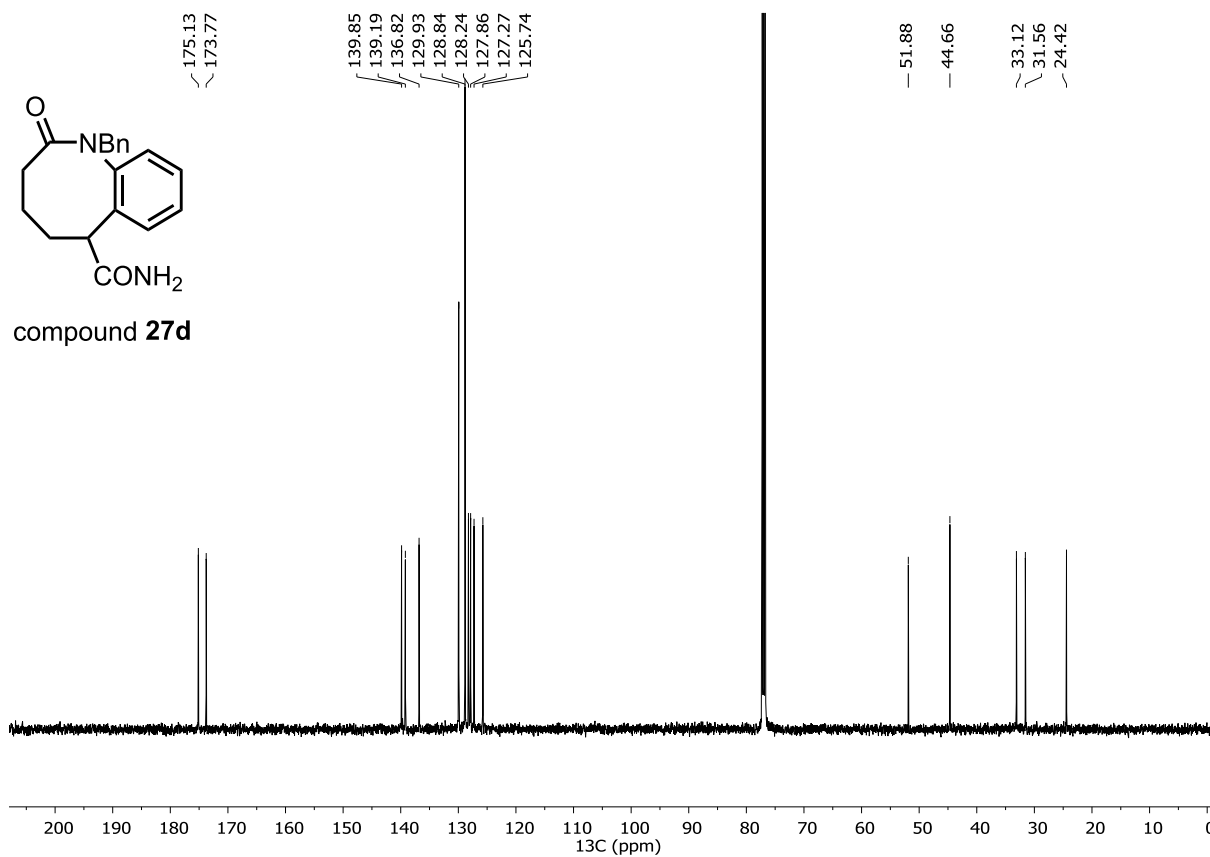

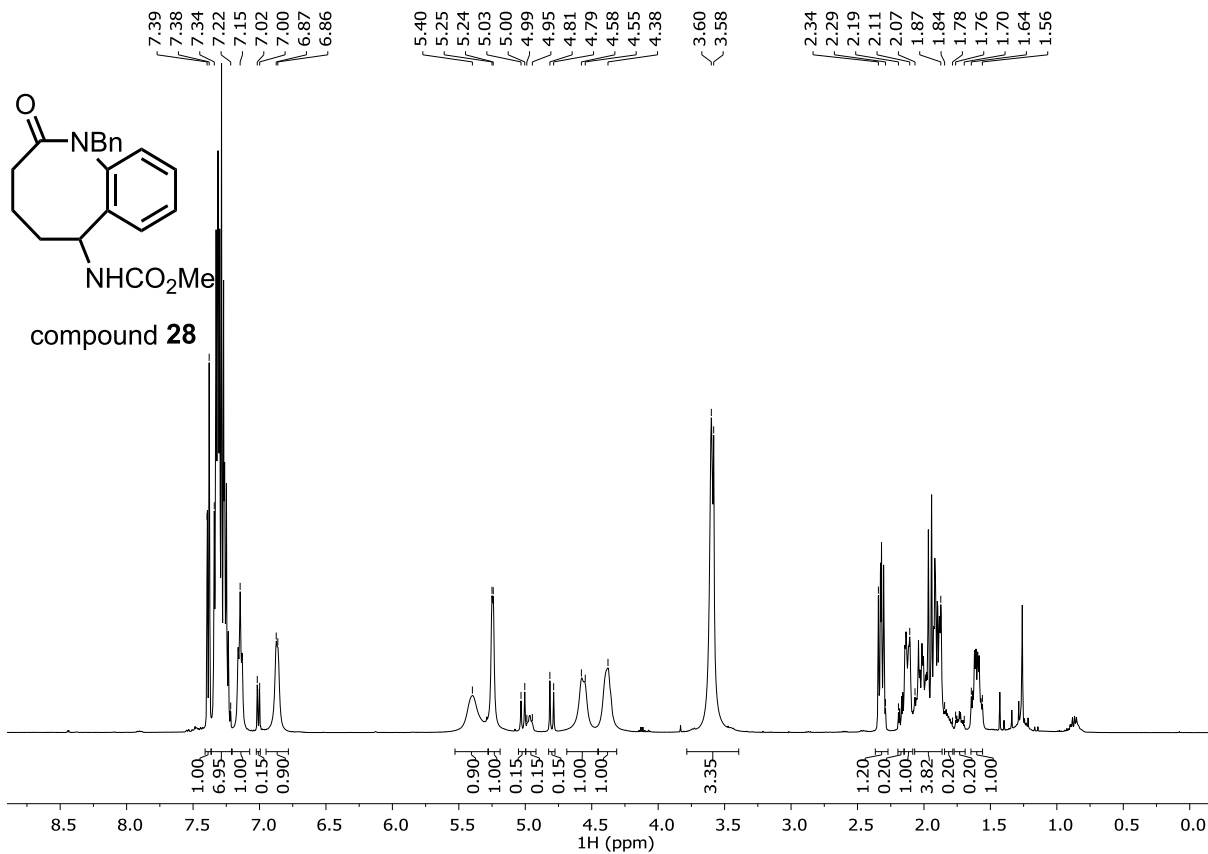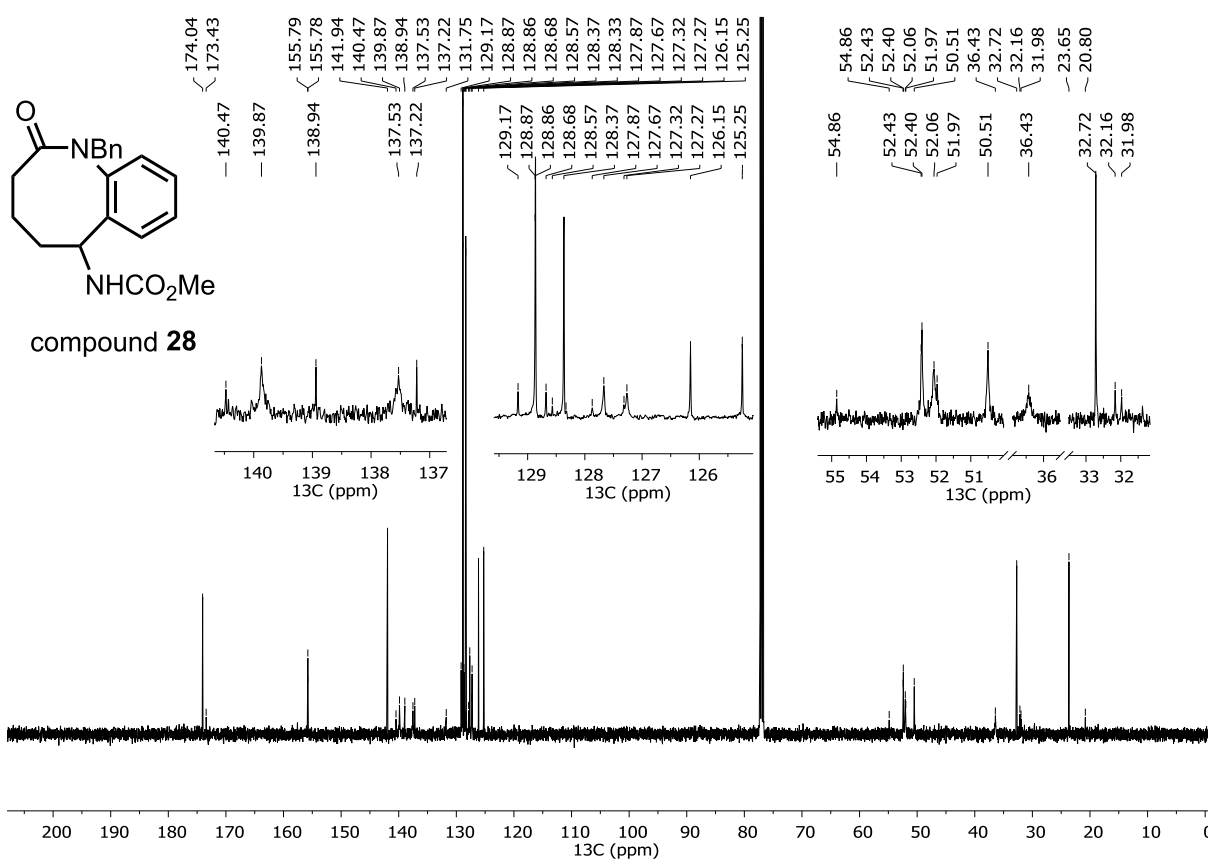

Supplement: CHEM-25-14912-s001.pdf [file CHEM-25-14912-s001.pdf]
